# Supplementary material for: miR-182 and miR-10a Are Key Regulators of Treg Specialisation and Stability during Schistosome and Leishmania-associated Inflammation
Source: PubMed Central journal article supplement (PMC3695057; doi:10.1371/journal.ppat.1003451), 2013-06-27

**Supplementary Table 2**

| <b>A</b> |           |             |               |              |               |              |                               |
|----------|-----------|-------------|---------------|--------------|---------------|--------------|-------------------------------|
| sample   | sample id | total reads | unique filter | unique miRNA | unique genome | unique total | percent unique of total reads |
| Sm-1     | 1         | 12051092    | 242508        | 392962       | 488338        | 1123808      | 9.32536238                    |
| Sm-2     | 2         | 15532258    | 102801        | 170083       | 160818        | 433702       | 2.79226626                    |
| Sm-3     | 3         | 19066403    | 137009        | 110736       | 114473        | 362218       | 1.89977103                    |
| Sm-4     | 4         | 13469369    | 165857        | 219945       | 417708        | 802510       | 5.96546134                    |
| Lm-1     | 5         | 15606322    | 109158        | 94163        | 111199        | 314520       | 2.01533712                    |
| Lm-2     | 6         | 21048407    | 55239         | 15743        | 33249         | 104231       | 0.49519662                    |
| N1       | 7         | 14268959    | 132450        | 321171       | 204430        | 658051       | 4.611766                      |
| N2       | 8         | 16433499    | 107997        | 197172       | 165137        | 470306       | 2.86187379                    |
| N3       | 9         | 21953109    | 143646        | 339756       | 503314        | 986716       | 4.49465267                    |
|          | totals    | 149429418   | 1196665       | 1861731      | 2198666       | 5257062      | 3.51809039                    |

| <b>B</b> |           |             |              |             |              |              |                             |
|----------|-----------|-------------|--------------|-------------|--------------|--------------|-----------------------------|
| sample   | sample id | total reads | total filter | total miRNA | total genome | total mapped | percent of all reads mapped |
| Sm-1     | 1         | 12051092    | 4296507      | 497209      | 874239       | 5667955      | <b>47.032709</b>            |
| Sm-2     | 2         | 15532258    | 7477726      | 215526      | 362647       | 8055899      | <b>51.865601</b>            |
| Sm-3     | 3         | 19066403    | 9393470      | 135852      | 299331       | 9828653      | <b>51.549592</b>            |
| Sm-4     | 4         | 13469369    | 4942118      | 286177      | 710551       | 5938846      | <b>44.091494</b>            |
| Lm-1     | 5         | 15606322    | 7255423      | 120668      | 322337       | 7699828      | <b>49.337877</b>            |
| Lm-2     | 6         | 21048407    | 11926450     | 21186       | 104177       | 12051813     | <b>57.257601</b>            |
| N1       | 7         | 14268959    | 4774400      | 413488      | 558935       | 5746823      | <b>40.274998</b>            |
| N2       | 8         | 16433499    | 6937010      | 243373      | 404712       | 7585095      | <b>46.156299</b>            |
| N3       | 9         | 21953109    | 11415343     | 422349      | 872412       | 12710104     | <b>57.896601</b>            |
|          | totals    | 149429418   | 68418447     | 2357228     | 4509341      | 75285016     | <b>50.381656</b>            |

| <b>C</b> |           |             |               |             |             |             |         |           |                    |             | miRNA %     | SSrRNA %    | LSrRNA %    | SSrRNA % | tRNA % | Other |
|----------|-----------|-------------|---------------|-------------|-------------|-------------|---------|-----------|--------------------|-------------|-------------|-------------|-------------|----------|--------|-------|
| sample   | sample id | total reads | unique mapped | miRNA       | SSrRNA      | LSrRNA      | SSrRNA  | tRNA      | of uniquely mapped |             |             |             |             |          |        |       |
| Sm-1     | 1         | 12051092    | 1123808       | 392517      | 30690       | 143992      | 34055   | 305457    | 34.927             | 2.731       | 12.813      | 3.03        | 27.181      |          |        |       |
| Sm-2     | 2         | 15532258    | 433702        | 169779      | 5119        | 44164       | 21620   | 226896    | 39.146             | 1.18        | 10.183      | 4.985       | 52.316      |          |        |       |
| Sm-3     | 3         | 19066403    | 362218        | 110386      | 10904       | 55018       | 21148   | 164622    | 30.475             | 3.01        | 15.189      | 5.838       | 45.448      |          |        |       |
| Sm-4     | 4         | 13469369    | 803510        | 219523      | 13038       | 86439       | 30377   | 186814    | 27.321             | 1.623       | 10.758      | 3.781       | 23.25       |          |        |       |
| average  |           | 15029780.5  | 680809.5      | 223051.25   | 14937.75    | 82403.25    | 26800   | 220947.25 | 32.96725           | 2.136       | 12.23575    | 4.4085      | 37.04875    | 11.20375 |        |       |
| Lm-1     | 5         | 15606322    | 314520        | 93750       | 1761        | 45086       | 24692   | 56519     | 29.807             | 0.56        | 14.335      | 7.851       | 17.97       |          |        |       |
| Lm-2     | 6         | 21048407    | 104231        | 15524       | 1959        | 8055        | 3533    | 90692     | 14.894             | 1.879       | 7.728       | 3.39        | 87.011      |          |        |       |
| average  |           | 18327364.5  | 209375.5      | 54637       | 1860        | 26570.5     | 14112.5 | 73605.5   | 22.3505            | 1.2195      | 11.0315     | 5.6205      | 52.4905     | 7.2875   |        |       |
| N1       | 7         | 14268959    | 658051        | 320656      | 7146        | 58896       | 30554   | 150051    | 48.728             | 1.086       | 8.95        | 4.643       | 22.802      |          |        |       |
| N2       | 8         | 16433499    | 470306        | 196825      | 5728        | 39941       | 18676   | 136637    | 41.85              | 1.218       | 8.493       | 3.971       | 29.053      |          |        |       |
| N3       | 9         | 21953109    | 986716        | 339233      | 7626        | 60180       | 32664   | 161140    | 34.38              | 0.773       | 6.099       | 3.31        | 16.331      |          |        |       |
| average  |           | 17551855.67 | 705024.3333   | 285571.3333 | 6833.333333 | 53005.66667 | 27298   | 149276    | 41.65266667        | 1.025666667 | 7.847333333 | 3.974666667 | 22.72866667 | 22.771   |        |       |
|          | total     | 149429418   | 5257062       | 1858193     | 83971       | 541771      | 217319  | 1478828   |                    |             |             |             |             |          |        |       |

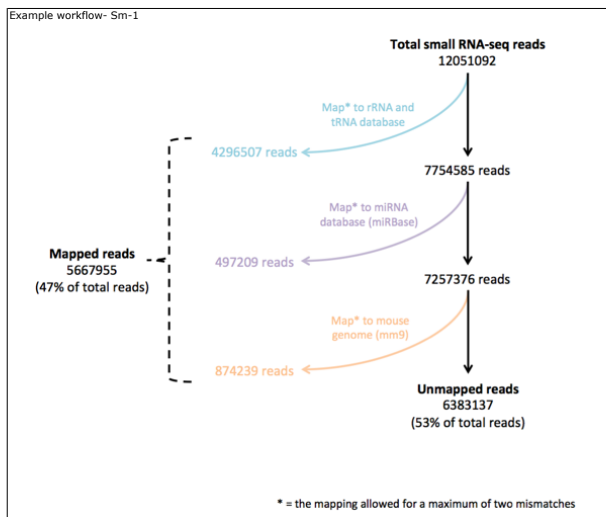

Supplement: ppat.1003451.s010.pdf [file ppat.1003451.s010.pdf]
