# Supplementary material for: miR-182 and miR-10a Are Key Regulators of Treg Specialisation and Stability during Schistosome and Leishmania-associated Inflammation
Source: PubMed Central journal article supplement (PMC3695057; doi:10.1371/journal.ppat.1003451), 2013-06-27
Supplement: ppat.1003451.s009.pdf [file ppat.1003451.s009.pdf]

|          |               |               |            |
|----------|---------------|---------------|------------|
| 10471535 | Fam129b       | NM_146119     | 0.00026598 |
| 10379034 | Tlcl1         | NM_026708     | 0.00026703 |
| 10545534 | Rnf26         | NM_153762     | 0.00026737 |
| 10393754 | Actg1         | NM_009609     | 0.00026824 |
| 10501048 | Z010016118Rik | AK140363      | 0.00026871 |
| 10598034 | Ndr2          | ENSMUST000000 | 0.00026899 |
| 10456492 | D18Ert653e    | BC096371      | 0.00026987 |
| 10566398 | Olfrr66       | NM_147096     | 0.00027    |
| 10474825 | D2Ert4750e    | NM_026412     | 0.00027054 |
| 10578145 | Erh           | NM_007951     | 0.00027172 |
| 10603289 | Cicn5         | NM_016691     | 0.0002723  |
| 10505911 | Dmrt1         | NM_175647     | 0.00027288 |
| 10478633 | Mmp9          | NM_013599     | 0.00027308 |
| 10585428 | Dnaj4         | NM_021422     | 0.00027736 |
| 10487480 | Sub1          | NM_001113179  | 0.00027804 |
| 10369615 | Srgn          | NM_011157     | 0.00027816 |
| 10582562 |               | ---           | 0.00027824 |
| 10521205 | Sh3bp2        | NM_001145859  | 0.0002784  |
| 10400892 | Gm7985        | XR_034366     | 0.00028048 |
| 10482863 | Gm13549       | XR_031802     | 0.00028063 |
| 10396740 | Gphn          | NM_172952     | 0.00028218 |
| 10407173 | Il6st         | NM_010560     | 0.00028278 |
| 10410625 | Sdha          | NM_023281     | 0.00028303 |
| 10343272 |               | ---           | 0.00028381 |
| 10386219 | Zfp39         | NM_011758     | 0.00028395 |
| 10421717 | Gm1587        | NM_001033440  | 0.00028444 |
| 10462398 | Pcd11g2       | NM_001396     | 0.00028491 |
| 10452430 | Fbxl17        | BC138330      | 0.00028666 |
| 10565990 | Art2a         | NM_007490     | 0.00028697 |
| 10451943 | Plin5         | NM_001077348  | 0.00028759 |
| 10361110 | Dtl           | NM_029766     | 0.00028923 |
| 10513158 | Ptpn3         | NM_011207     | 0.00028956 |
| 10424543 | Wisp1         | NM_018865     | 0.00029068 |
| 10422194 | Rbm26         | NM_134077     | 0.00029069 |
| 10512574 | Gba2          | NM_172692     | 0.00029141 |
| 10396862 | Strm          | AF031663      | 0.00029187 |
| 10516246 | Cdca8         | NM_026560     | 0.00029188 |
| 10558740 | Gm15542       | XM_001480612  | 0.00029189 |
| 10417617 | Gapdh         | NM_008084     | 0.00029265 |
| 10362450 | Trdn          | NM_029726     | 0.00029359 |
| 10374323 | Zpbb          | NM_015785     | 0.00029373 |
| 10490150 | Zbp1          | NM_021394     | 0.0002942  |
| 10565994 | Art2b         | NM_019915     | 0.00029437 |
| 10395376 | Ankmy2        | NM_146033     | 0.00029477 |
| 10364130 | Zfp280b       | NM_177475     | 0.00029495 |
| 10496447 | Adh6a         | NM_026945     | 0.00029519 |
| 10474239 | Gapdh         | BC092294      | 0.00029549 |
| 10444589 | Hspa1a        | NM_010479     | 0.00029621 |
| 10501063 | Cd93          | NM_007651     | 0.00029672 |
| 10385484 | Ddx5          | NM_007840     | 0.00029767 |
| 10435565 | Hcls1         | NM_008225     | 0.00029777 |
| 10385159 | Rars          | NM_025936     | 0.00029993 |
| 10439208 | Sec22a        | NM_133704     | 0.00029937 |
| 10505674 | Cntln         | NM_175275     | 0.00030079 |
| 10512701 | Tomm5         | NM_001099675  | 0.00030131 |
| 10532164 | Atp5k         | NM_007507     | 0.00030195 |
| 10600482 |               | ---           | 0.00030244 |
| 10466127 | AW112010      | EF660528      | 0.00030691 |
| 10486396 | Ehd4          | NM_133838     | 0.00030782 |
| 10572235 | Lpar2         | NM_020028     | 0.00030813 |
| 10396068 | Ppil5         | NM_001081406  | 0.00030837 |
| 10338392 |               | ---           | 0.00030904 |
| 10357788 | Ppp1r15b      | NM_133819     | 0.00030972 |
| 10417004 | Dzip1         | NM_025943     | 0.00030998 |
| 10480432 | Mastl         | NM_025979     | 0.00031029 |
| 10543785 | AB041803      | AB041803      | 0.00031063 |
| 10354588 | Stk17b        | NM_133810     | 0.00031167 |
| 10367379 | Sl            | NM_021882     | 0.00031242 |
| 10567903 | Sh2b1         | NM_011363     | 0.00031325 |
| 10459755 | Z810433K01Rik | NM_025581     | 0.00031379 |
| 10381588 | Grn           | NM_008175     | 0.0003159  |
| 10550365 | Prkd2         | NM_178900     | 0.00031643 |
| 10474875 | Casc5         | NM_029617     | 0.0003169  |
| 10425161 | Lgals1        | NM_008495     | 0.0003182  |
| 10448202 | Tpm4          | NM_001001491  | 0.00031821 |
| 10420837 | Extl3         | NM_018788     | 0.00031825 |
| 10412260 | Fst           | NM_008046     | 0.0003183  |
| 10453512 | Kpna2         | NM_010655     | 0.00031863 |
| 10580590 | Gapdh         | NM_008084     | 0.00031878 |
| 10592303 | Reps3         | NM_050570     | 0.00032033 |
| 10432986 | Aaas          | NM_153416     | 0.0003209  |
| 10436830 | Ifnar2        | NM_010509     | 0.00032106 |
| 10469255 | Prkcq         | NM_008859     | 0.00032237 |
| 10603346 | Plp2          | NM_019755     | 0.0003224  |
| 10465770 |               | ---           | 0.00032268 |
| 10508228 | Zmym6         | NM_177462     | 0.00032328 |
| 10545651 | Ino80b        | NM_023547     | 0.00032359 |
| 10367499 | Olfrr788      | NM_146551     | 0.00032391 |
| 10353010 | Mybl1         | NM_008651     | 0.00032475 |
| 10574415 | Z700047G07Rik | ENSMUST000000 | 0.00032523 |
| 10437852 | 4921513D23Rik | NM_001081154  | 0.00032569 |
| 10446777 | Ehd3          | NM_020578     | 0.00032687 |
| 10372844 | Rassf3        | NM_138956     | 0.00032798 |
| 10339709 |               | ---           | 0.00032829 |
| 10356001 | Cul3          | NM_016716     | 0.00032938 |
| 10543118 | Glicc1        | NM_133236     | 0.00033    |
| 10483264 | Ttc21b        | NM_001047604  | 0.00033012 |
| 10568217 | Dctpp1        | NM_023203     | 0.00033073 |
| 10584821 | Cd3d          | NM_013487     | 0.00033156 |
| 10442468 | Cas9          | NM_027937     | 0.00033193 |
| 10497622 | Lrrc34        | NM_027941     | 0.00033336 |
| 10340521 |               | ---           | 0.00033379 |
| 10338116 |               | ---           | 0.00033396 |
| 10483856 | Prkra         | NM_011871     | 0.00033412 |
| 10562663 | Rps4x         | NM_009094     | 0.00033466 |
| 10582295 | Odc1          | NM_013614     | 0.00033532 |
| 10511692 | Nbn           | NM_013752     | 0.00033532 |
| 10414793 | C920008G01Rik | ENSMUST000000 | 0.00033597 |
| 10414903 | C920008G01Rik | ENSMUST000000 | 0.00033597 |
| 10427290 | Hoxc8         | NM_010466     | 0.00033669 |
| 10443749 | Ubash3a       | NM_177823     | 0.00033825 |
| 10340654 |               | ---           | 0.00033863 |
| 10524353 | Tfip11        | NM_018783     | 0.00034056 |
| 10359525 | Bat2d         | NM_001081290  | 0.00034391 |
| 10496756 | Mcoln3        | NM_134160     | 0.00034392 |
| 10561474 | Il28a         | NM_001024673  | 0.00034481 |
| 10570982 | Fgfr1         | NM_010206     | 0.00034505 |
| 10354307 | Txn1          | NM_011660     | 0.00034518 |
| 10455954 | Gm4951        | NM_001033767  | 0.00034609 |
| 10429560 | Ly6i          | NM_020498     | 0.00034633 |
| 10338104 |               | ---           | 0.00034641 |
| 10434925 | Hes1          | NM_008235     | 0.00034911 |
| 10360695 | Nvl           | NM_026171     | 0.00034914 |
| 10395365 | Agr2          | NM_011783     | 0.00034952 |
| 10406663 | Arsb          | NM_009712     | 0.00035035 |
| 10480027 | Zbtb2         | NM_001033466  | 0.00035086 |
| 10343422 |               | ---           | 0.00035112 |
| 10445119 | H2-M3         | NM_013819     | 0.00035173 |

|               |       |          |
|---------------|-------|----------|
| Pnpt1         | -2.16 | 3.60E-03 |
| Zfp597        | -2.16 | 5.40E-04 |
| Hibch         | -2.16 | 2.08E-03 |
| Kdm5d         | -2.16 | 7.65E-04 |
| Pmm2          | -2.17 | 6.49E-04 |
| P2x7          | -2.17 | 8.07E-05 |
| Dnajc3        | -2.18 | 4.23E-03 |
| 4930432021Rik | -2.18 | 2.36E-04 |
| Ppilh         | -2.18 | 3.60E-05 |
| Rsl1          | -2.18 | 1.81E-03 |
| Ephx1         | -2.19 | 1.74E-02 |
| Pms1          | -2.21 | 6.60E-05 |
| Mudeng        | -2.21 | 1.07E-03 |
| Ddx43         | -2.21 | 1.73E-04 |
| Cenpa         | -2.21 | 3.30E-03 |
| Vta1          | -2.21 | 6.22E-03 |
| Msh2          | -2.21 | 2.51E-03 |
| Cbwd1         | -2.22 | 1.69E-02 |
| Zfp759        | -2.23 | 8.25E-03 |
| BC018101      | -2.23 | 1.69E-03 |
| Fnta          | -2.24 | 1.62E-04 |
| Zfp81         | -2.24 | 4.63E-03 |
| Z410002022Rik | -2.25 | 7.41E-06 |
| Ifih1         | -2.26 | 6.28E-05 |
| Pfdr4         | -2.26 | 1.07E-02 |
| Ugc           | -2.27 | 6.27E-05 |
| Gpr89         | -2.27 | 1.13E-03 |
| Orai17        | -2.27 | 1.73E-03 |
| Snord16a      | -2.27 | 3.50E-03 |
| Zfp42         | -2.29 | 1.43E-03 |
| Rnf213        | -2.29 | 1.69E-03 |
| Tgds          | -2.29 | 6.15E-03 |
| Thumpp3       | -2.29 | 5.99E-03 |
| Prkcq         | -2.30 | 5.45E-04 |
| Dnahc8        | -2.30 | 8.04E-04 |
| E030037K03Rik | -2.32 | 9.68E-05 |
| Zfp809        | -2.33 | 5.33E-03 |
| Mext4         | -2.35 | 3.45E-03 |
| Taf9b         | -2.35 | 8.56E-03 |
| Zfp719        | -2.35 | 9.48E-05 |
| Gm10673       | -2.35 | 1.44E-02 |
| Mir421        | -2.36 | 1.25E-03 |
| Rrs1          | -2.37 | 1.18E-02 |
| Manea         | -2.39 | 8.60E-04 |
| 5730455013Rik | -2.40 | 4.22E-03 |
| Gimap5        | -2.40 | 1.33E-05 |
| Sp140         | -2.42 | 8.31E-03 |
| Zfp160        | -2.42 | 1.13E-03 |
| I110057K04Rik | -2.42 | 6.52E-03 |
| Mipol1        | -2.44 | 8.64E-04 |
| Ly6i          | -2.44 | 5.58E-04 |
| Parp11        | -2.45 | 4.35E-04 |
| Tmem19        | -2.45 | 1.07E-02 |
| Fam105a       | -2.48 | 3.13E-03 |
| 9230105E10Rik | -2.48 | 2.58E-04 |
| AA987161      | -2.49 | 3.48E-03 |
| Slc38a1       | -2.50 | 8.97E-04 |
| Ccdc111       | -2.50 | 4.11E-05 |
| Dnajc13       | -2.51 | 4.57E-03 |
| Tmem167       | -2.52 | 6.09E-03 |
| Cul5          | -2.53 | 3.84E-03 |
| Cspp1         | -2.56 | 3.55E-03 |
| Zfp455        | -2.61 | 4.35E-03 |
| Mir103-2      | -2.65 | 9.34E-03 |
| Gm10847       | -2.71 | 2.83E-03 |
| Ppp2r5c       | -2.73 | 1.40E-03 |
| Rars2         | -2.76 | 3.43E-04 |
| Atpv60d2      | -2.80 | 1.73E-03 |
| Fam49a        | -2.89 | 2.58E-03 |
| Gm6907        | -2.90 | 2.53E-03 |
| Ms4e4b        | -2.97 | 5.85E-04 |
| Itga4         | -2.99 | 1.48E-05 |
| Zfp518a       | -3.04 | 3.66E-04 |
| Mk67ip        | -3.05 | 1.14E-03 |
| Rnu73b        | -3.10 | 6.85E-03 |
| Zfp418        | -3.14 | 2.14E-05 |
| Gm10778       | -3.25 | 1.02E-04 |
| Cybb          | -3.42 | 6.01E-06 |
| Zfp617        | -3.57 | 1.11E-02 |
| 4933426121Rik | -3.58 | 6.18E-04 |
| Gm4956        | -3.75 | 3.14E-03 |
| B230307C23Rik | -4.10 | 9.51E-03 |
| Arhgef12      | -4.16 | 1.09E-02 |
| Art2b         | -7.90 | 1.18E-03 |



|          |               |                  |            |
|----------|---------------|------------------|------------|
| 10556005 | Ilk           | NM_010562        | 0.00035214 |
| 10435789 | Zbb20         | ENSMUST000000    | 0.00035247 |
| 10493259 | Ssr2          | NM_025448        | 0.00035333 |
| 10593130 | Sidt2         | NM_172257        | 0.00035429 |
| 10504753 | LOC641050     | M11024           | 0.00035503 |
| 10446763 | Lbt           | NM_029999        | 0.00035635 |
| 10577528 | Al316807      | NM_001012667     | 0.00035642 |
| 10415513 | Parp4         | NM_001145978     | 0.00035708 |
| 10406551 | Ssbp2         | NM_024272        | 0.00036193 |
| 10508707 | Tmem200b      | ENSMUST000000    | 0.00036315 |
| 10377253 | 9130017K11Rik | ENSMUST000000    | 0.00036504 |
| 10537955 |               | ---              | 0.00036522 |
| 10411359 | Pip2          | NM_019755        | 0.00036538 |
| 10368612 | Gapdh         | NM_008084        | 0.00036548 |
| 10596637 | Mapkapk3      | NM_178907        | 0.00036639 |
| 10548884 | Erp27         | NM_026983        | 0.00036709 |
| 10409220 | Hist2h2aa1    | NM_012549        | 0.00036758 |
| 10470788 | Odf2          | NM_001113213     | 0.00036863 |
| 10579331 | Gdf15         | NM_011819        | 0.00036951 |
| 10557806 |               | ---              | 0.00037061 |
| 10477233 | Xkr7          | NM_001011732     | 0.00037079 |
| 10512465 | Fam166b       | NM_177377        | 0.00037152 |
| 10453399 | Srbd1         | NM_030133        | 0.00037237 |
| 10525516 | Wdr66         | BC138176         | 0.00037817 |
| 10438358 |               | 05-Sep NM_213614 | 0.00037887 |
| 10383311 | Gm9734        | ENSMUST000000    | 0.00037953 |
| 10443977 | Tmem191c      | NM_174773        | 0.00037973 |
| 10554718 | Vmn2r71       | NM_001105184     | 0.00038109 |
| 10346298 | Coq10b        | NM_001039710     | 0.00038215 |
| 10374621 | Ahsa2         | NM_172391        | 0.00038332 |
| 10385533 | Tgtp          | NM_011579        | 0.00038332 |
| 10359097 | Tor1aip1      | NM_001160018     | 0.00038334 |
| 10410892 | Rasa1         | NM_145452        | 0.00038406 |
| 10436892 | Itns1         | NM_010587        | 0.00038432 |
| 10455826 | Megf10        | NM_001001979     | 0.00038451 |
| 10429555 | Z010109103Rik | NM_025929        | 0.00038588 |
| 10401149 | Plek2         | NM_013738        | 0.00038643 |
| 10390072 | Gm11541       | NM_001007584     | 0.00038776 |
| 10577337 | Defb40        | NM_183039        | 0.00038794 |
| 10340417 |               | ---              | 0.00038796 |
| 10440621 | Grik1         | NM_146072        | 0.00038851 |
| 10517364 | A330049M08Rik | BC005730         | 0.00038993 |
| 10574944 | Dus2l         | NM_025518        | 0.00039005 |
| 10341117 |               | ---              | 0.00039126 |
| 10351277 | Nme7          | NM_138314        | 0.00039205 |
| 10483401 | Spc25         | NM_025565        | 0.00039238 |
| 10382980 | Svnr2         | NM_009304        | 0.00039291 |
| 10493789 | S100a13       | NM_009113        | 0.00039334 |
| 10536390 | Giccl1        | NM_133236        | 0.00039374 |
| 10340797 |               | ---              | 0.00039385 |
| 10381096 | Igfbp4        | NM_010517        | 0.00039597 |
| 10581181 | Tradd         | NM_001033161     | 0.00039669 |
| 10510580 | Tnfrsf9       | NM_011612        | 0.00039731 |
| 10597973 | Lztf1         | NM_033322        | 0.00039981 |
| 10550870 | Lypd5         | NM_029806        | 0.00040015 |
| 10443980 | Myo1f         | NM_053214        | 0.00040029 |
| 10339745 |               | ---              | 0.00040205 |
| 10345406 |               | ---              | 0.00040233 |
| 10600604 | Dmd           | NM_007868        | 0.00040286 |
| 10429802 | Plec1         | NM_011117        | 0.00040301 |
| 10408077 | Hist1h2ak     | NM_178183        | 0.00040343 |
| 10542335 | Gprc5a        | NM_181444        | 0.00040389 |
| 10385842 | Rad50         | NM_009012        | 0.00040459 |
| 10400326 | Eapp          | NM_025456        | 0.00040544 |
| 10421325 | Piwil2        | NM_021308        | 0.00040629 |
| 10395692 | Arhgap5       | NM_009706        | 0.00040774 |
| 10348376 | Heat7b1       | ENSMUST000000    | 0.00040793 |
| 10339920 |               | ---              | 0.00040852 |
| 10574163 | Nlrc5         | F3889356         | 0.00040894 |
| 10543859 | Akr1b3        | NM_009658        | 0.00040991 |
| 10526743 | Cops6         | NM_012002        | 0.00040911 |
| 10542237 |               | ---              | 0.00041106 |
| 10510399 | Masp2         | NM_001003893     | 0.00041125 |
| 10453276 | Thada         | NM_183021        | 0.00041113 |
| 10574812 | Ctcf          | NM_181322        | 0.00041145 |
| 10503315 | Rad54b        | NM_001039556     | 0.00041172 |
| 10595614 | Z810026P18Rik | BC032970         | 0.00041212 |
| 10514818 | BC055111      | NM_183182        | 0.00041275 |
| 10482323 | Ppp6c         | NM_024209        | 0.00041316 |
| 10486029 | Atad4         | NM_025675        | 0.00041326 |
| 10464688 | Ankrd13d      | NM_026720        | 0.00041345 |
| 10358191 | Camsap11      | NM_001081360     | 0.0004136  |
| 10419198 | Ero1l         | NM_015774        | 0.00041394 |
| 10607346 | Tspyl2        | NM_029836        | 0.00041409 |
| 10504838 | Nr4a3         | NM_015743        | 0.00041412 |
| 10370021 | Mif           | NM_010798        | 0.00041523 |
| 10479510 | 9230112E08Rik | ENSMUST000000    | 0.00041529 |
| 10549804 | Nlrp4c        | NM_031389        | 0.00041589 |
| 10391286 | Stat5b        | NM_001113563     | 0.00041787 |
| 10358038 | Rnrep         | NM_145417        | 0.00041848 |
| 10403943 | Hist1h2bm     | NM_178200        | 0.00041891 |
| 10598222 | 4930408F14Rik | BC117727         | 0.00041988 |
| 10597656 | Scn5a         | NM_021544        | 0.00042036 |
| 10538890 | LOC641050     | M11024           | 0.00042102 |
| 10352354 | A430110L20Rik | ENSMUST000000    | 0.00042226 |
| 10552715 | Z310016G11Rik | ENSMUST000000    | 0.00042288 |
| 10543031 | Sic25a13      | NM_015829        | 0.00042389 |
| 10468909 | Disp1         | NM_026866        | 0.00042486 |
| 10517664 |               | ---              | 0.00042571 |
| 10501837 | Gapdh         | NM_008084        | 0.00042585 |
| 10491967 | Gapdh         | NM_008084        | 0.00042585 |
| 10496626 | Gapdh         | NM_008084        | 0.00042585 |
| 10480032 | Gapdh         | NM_008084        | 0.00042585 |
| 10545765 | Gapdh         | NM_008084        | 0.00042585 |
| 10606058 | Cxcr3         | NM_009910        | 0.0004269  |
| 10374777 | Efemp1        | NM_146015        | 0.00042726 |
| 10340094 |               | ---              | 0.00042963 |
| 10570321 | Cul4a         | NM_146207        | 0.00042965 |
| 10537463 | Agk           | NM_023538        | 0.00042998 |
| 10414929 | Gm13949       | X63928           | 0.00043007 |
| 10539617 | Aims1         | NM_145223        | 0.00043053 |
| 10503223 | Chd7          | NM_001081417     | 0.00043109 |
| 10535435 | Zfp316        | NM_017467        | 0.00043119 |
| 10370721 | Sbno2         | NM_183426        | 0.00043166 |
| 10371271 | Zfp781        | NM_199062        | 0.00043314 |
| 10532472 | Ulk1          | NM_009469        | 0.00043481 |
| 10491106 | Pid1          | NM_008875        | 0.00043497 |
| 10557591 | Irgal         | NM_008400        | 0.000435   |
| 10389231 | Ccl3          | NM_011337        | 0.00043504 |
| 10408600 | Serpinc6a     | NM_009254        | 0.00043529 |
| 10511298 | 9430015G10Rik | NM_177205        | 0.0004355  |
| 10606436 | Nstn1         | NM_016710        | 0.00043659 |
| 10591763 | Zfp810        | NM_145612        | 0.00043738 |
| 10539295 | Dqx1          | NM_033606        | 0.00043772 |
| 10473919 | Ckap5         | NM_029437        | 0.00043815 |
| 10383152 |               | ---              | 0.00043854 |
| 10482791 | Gm13531       | XM_001474318     | 0.00043991 |
| 10351825 | Tagln2        | NM_178598        | 0.0004413  |

|          |               |               |            |
|----------|---------------|---------------|------------|
| 10452721 | Trmt61b       | NR 015549     | 0.00044211 |
| 10339540 |               | ---           | 0.00044224 |
| 10587665 | 4921528107Rik | ENSMUST000000 | 0.00044307 |
| 10494335 | Otud7b        | NM 001025613  | 0.00044364 |
| 10441073 | Kcni6         | NM 010606     | 0.00044398 |
| 10576603 | A630001O12Rik | ENSMUST000000 | 0.00044501 |
| 10343386 |               | ---           | 0.00044503 |
| 10437080 | Ttc3          | NM 009441     | 0.00044645 |
| 10356677 | Myeov2        | BC147334      | 0.00044736 |
| 10531675 | Sec31a        | NM 026969     | 0.00044793 |
| 10403978 | RP23-38E20.1  | NM 001097979  | 0.00044857 |
| 10450145 | Psmb9         | NM 013585     | 0.00044953 |
| 10433929 | Ppm1f         | NM 176833     | 0.00045084 |
| 10556280 | Swap70        | NM 009302     | 0.00045095 |
| 10517081 | Gm13213       | XM 620107     | 0.00045216 |
| 10417940 | Synpo2l       | NM 175132     | 0.00045361 |
| 10576953 |               | ---           | 0.00045451 |
| 10350392 | Aspm          | NM 009791     | 0.00045568 |
| 10542050 | Efcab4b       | NM 001033464  | 0.00045629 |
| 10608701 |               | ---           | 0.00045728 |
| 10388409 | Rpa1          | NM 026653     | 0.00045734 |
| 10456383 | Impa2         | NM 053261     | 0.00045799 |
| 10529995 | Dhx15         | NM 007839     | 0.00046378 |
| 10533725 | Gpr81         | NM 175520     | 0.00046543 |
| 10376864 | Ubb           | NM 011664     | 0.00046574 |
| 10430179 | Apol7b        | NM 001024848  | 0.00046737 |
| 10344200 |               | ---           | 0.00046992 |
| 10384210 |               | ---           | 0.00047145 |
| 10538957 | Eif2ak3       | BC054809      | 0.00047145 |
| 10488409 | 9230104L09Rik | NM 029960     | 0.00047152 |
| 10358605 | Hmcn1         | NM 001024720  | 0.00047234 |
| 10402020 | Emi5          | NM 001081191  | 0.00047271 |
| 10399725 | Sox11         | NM 009234     | 0.00047429 |
| 10601390 | Pgk1          | NM 008828     | 0.00047482 |
| 10490159 | Pmepa1        | NM 022995     | 0.00047653 |
| 10434754 | BC106179      | BC106179      | 0.00047994 |
| 10339336 |               | ---           | 0.00048031 |
| 10401966 | Galc          | NM 008079     | 0.00048138 |
| 10494386 | Hist1h2an     | NM 178184     | 0.00048284 |
| 10532865 | Git2          | NM 019834     | 0.00048311 |
| 10356859 | Dtymk         | NM 001105667  | 0.00048412 |
| 10515822 | Olf1342       | NM 146713     | 0.00048534 |
| 10494023 | Rorc          | NM 011281     | 0.00048709 |
| 10366519 | 5330438D12Rik | AK077360      | 0.00048722 |
| 10448383 | Prss33        | NM 001081399  | 0.00048737 |
| 10592023 | Aplp2         | NM 001102455  | 0.00048792 |
| 10385776 | Tcf7          | NM 009331     | 0.00048885 |
| 10429341 | Pik2          | NM 007982     | 0.00048956 |
| 10370780 | Pcsk4         | NM 008793     | 0.00048999 |
| 10365601 | Gnptab        | NM 001004164  | 0.00049088 |
| 10593878 | Snx33         | NM 175483     | 0.00049164 |
| 10558919 | Snora52       | AF357388      | 0.00049237 |
| 10348929 | Hnrmpf        | NM 133834     | 0.00049224 |
| 10353189 | Gm5523        | NR 004447     | 0.00049509 |
| 10448214 | 6330416L07Rik | NM 176962     | 0.00049577 |
| 10373660 | Olf1818       | NM 146777     | 0.00049612 |
| 10338200 |               | ---           | 0.00049617 |
| 10553829 | Gm7367        | NR 003376     | 0.00049635 |
| 10553811 | Gm7367        | NR 003376     | 0.00049635 |
| 10584399 | Olf1898       | NM 146871     | 0.00049648 |
| 10492049 | Fam48a        | NM 019995     | 0.00049693 |
| 10429972 | Cpsf1         | NM 053193     | 0.00049701 |
| 10414313 | Ubb           | NM 011664     | 0.00049769 |
| 10339552 |               | ---           | 0.00049788 |
| 10578401 | Zfp42         | NM 009556     | 0.00049842 |
| 10352556 | Gm3809        | XR 032441     | 0.00050007 |
| 10607395 | Magah1        | NM 023788     | 0.00050054 |
| 10503010 | Fgat          | NM 029330     | 0.00050502 |
| 10503484 | Fam82b        | NM 025476     | 0.00050536 |
| 10402598 | Beqain        | ENSMUST000000 | 0.00050391 |
| 10410650 | Zfp825        | NM 146231     | 0.00050467 |
| 10346747 | Cyp20a1       | NM 030013     | 0.00050556 |
| 10379127 | Spag5         | NM 017407     | 0.00050598 |
| 10422007 |               | ---           | 0.00050622 |
| 10533145 | Tpcn1         | NM 145853     | 0.00050767 |
| 10437257 | Zfp597        | NM 001033159  | 0.00050786 |
| 10496592 | Gbp2          | NM 010260     | 0.00050818 |
| 10604799 | Atp11c        | NM 001037863  | 0.00050902 |
| 10454298 | Zfp397        | NM 027007     | 0.00050995 |
| 10553918 | Pacdc         | NM 176831     | 0.00050991 |
| 10403980 | RP23-38E20.1  | NM 001097979  | 0.00051025 |
| 10576191 | Spg7          | NM 153176     | 0.00051053 |
| 10348889 | D2hgdh        | NM 178882     | 0.00051108 |
| 10349014 | Capza1        | NM 009797     | 0.00051242 |
| 10416753 | Pibf1         | NM 029320     | 0.00051384 |
| 10578690 | Neil3         | NM 146208     | 0.00051555 |
| 10556214 |               | ---           | 0.00051829 |
| 10447490 | Pja2          | NM 001025309  | 0.00051965 |
| 10422493 | Gpr18         | NM 182806     | 0.00051991 |
| 10514368 | Gm12070       | NR 002890     | 0.00052159 |
| 10476680 | Zfp133        | AF332089      | 0.00052284 |
| 10449419 | Tead3         | NM 001098226  | 0.00052314 |
| 10443598 | Dnahc8        | NM 013811     | 0.00052328 |
| 10604610 |               | ---           | 0.00052435 |
| 10461856 | Gna14         | NM 008137     | 0.00052505 |
| 10383202 |               | ---           | 0.00052622 |
| 10357191 | Ptpn4         | NM 019933     | 0.00052671 |
| 10349872 |               | ---           | 0.00052777 |
| 10495562 | Lrrc39        | NM 175413     | 0.00052828 |
| 10411782 | Pik3r1        | NM 001077495  | 0.00052996 |
| 10563323 | Nucb1         | NM 008749     | 0.00053238 |
| 10512640 | Gne           | NM 015828     | 0.00053261 |
| 10502165 | Sec24b        | NM 207209     | 0.00053366 |
| 10380689 | Cbx1          | NM 007622     | 0.00053533 |
| 10354677 | Ankrd44       | NM 001081433  | 0.00053768 |
| 10416938 | Gm4822        | XM 139243     | 0.00053803 |
| 10368370 | Gm8681        | XR 032130     | 0.00053877 |
| 10510668 | Tnfrsf25      | NM 033042     | 0.00053949 |
| 10394926 |               | ---           | 0.00053954 |
| 10592531 |               | ---           | 0.00053977 |
| 10474102 |               | ---           | 0.00054117 |
| 10580733 | Bbs2          | NM 026116     | 0.00054295 |
| 10584578 | Hspa8         | M13967        | 0.00054321 |
| 10565156 | Homer2        | NM 011983     | 0.00054366 |
| 10535213 | Snx8          | NM 172277     | 0.00054443 |
| 10392970 | Mif4gd        | NM 027162     | 0.00054445 |
| 10585588 | Cspg4         | NM 139001     | 0.00054494 |
| 10457729 | Dsc1          | ENSMUST000000 | 0.00054508 |
| 10521136 | Whsc1         | NM 001081102  | 0.00054563 |
| 10447702 | Pp1h          | NM 028677     | 0.00054586 |
| 10521498 | Crmp1         | NM 007765     | 0.00054796 |
| 10505187 | Ubcg          | NM 011673     | 0.00054904 |
| 10406426 | Cetn3         | NM 007684     | 0.00054938 |
| 10514158 | Psp1          | NM 133948     | 0.00055005 |
| 10357472 | Cxcr4         | NM 009911     | 0.00055046 |
| 10602038 | E230019M04Rik | BC119078      | 0.00055141 |
| 10554142 | 2310037I24Rik | BC083325      | 0.00055253 |
| 10579114 | Yjefn3        | ENSMUST000000 | 0.00055316 |

|          |               |               |            |
|----------|---------------|---------------|------------|
| 10421143 | Adam28        | NM 010082     | 0.00055345 |
| 10584576 | Hspa8         | M13967        | 0.00055423 |
| 10566138 | Olfir544      | NM 020289     | 0.00055433 |
| 10556246 | Zfp143        | NM 009281     | 0.00055483 |
| 10400170 | Prkd1         | NM 008858     | 0.00055719 |
| 10553301 | Ldha          | NM 010699     | 0.00055764 |
| 10389865 | Nme1          | NM 008704     | 0.00055797 |
| 10578387 | Zfp353        | NM 153096     | 0.00055812 |
| 10410508 | Ndufs6        | NM 010888     | 0.00056063 |
| 10491958 | Gm10729       | ENSMUST000000 | 0.00056102 |
| 10417183 | Pcca          | NM 144844     | 0.00056126 |
| 10537406 | Clec2l        | NM 001101507  | 0.00056129 |
| 10542275 | Etv6          | NM 007961     | 0.00056355 |
| 10344545 |               | ---           | 0.00056367 |
| 10608695 |               | ---           | 0.00056471 |
| 10338353 |               | ---           | 0.00056501 |
| 10588203 | Ky            | NM 024291     | 0.00056532 |
| 10504957 | Smc2          | NM 008017     | 0.00056758 |
| 10371770 | Gas2l3        | NM 001033331  | 0.00056831 |
| 10487433 | Zfp661        | NM 028141     | 0.00056888 |
| 10366746 | Lrig3         | NM 177152     | 0.00057024 |
| 10483536 | 4930578N16Rik | BC125570      | 0.00057247 |
| 10469322 | Vim           | NM 011701     | 0.00057362 |
| 10347254 | Smarcal1      | NM 018817     | 0.00057468 |
| 10419390 | Gm4818        | XR 033116     | 0.00057512 |
| 10365845 | Fgd6          | NM 053072     | 0.00057674 |
| 10369319 | Ctsd          | NM 009983     | 0.00057804 |
| 10512949 | Abca1         | NM 013494     | 0.00058048 |
| 10339391 |               | ---           | 0.00058127 |
| 10433462 | Pmm2          | NM 016881     | 0.00058182 |
| 10363773 | Rhobtb1       | NM 001081347  | 0.00058258 |
| 10435112 | Muc4          | NM 080457     | 0.00058361 |
| 10452980 | Eif2ak2       | NM 011163     | 0.00058399 |
| 10520782 | Zfp512        | NM 172993     | 0.00058414 |
| 10607972 | Kdm5d         | NM 011419     | 0.00058484 |
| 10394936 |               | ---           | 0.00058604 |
| 10505922 |               | ---           | 0.00058703 |
| 10608718 |               | ---           | 0.00058779 |
| 10462195 | Kank1         | NM 181404     | 0.00058894 |
| 10342595 |               | ---           | 0.00059116 |
| 10455761 | Prdm6         | NM 001033281  | 0.00059293 |
| 10504761 | LOC641050     | M11024        | 0.00059318 |
| 10400470 | Cox6c         | NM 053071     | 0.00059532 |
| 10346678 | Carf          | NM 139150     | 0.00059553 |
| 10548905 | Eps8          | NM 007945     | 0.00059695 |
| 10408937 | Atxn1         | NM 009124     | 0.00059971 |
| 10430572 |               | ---           | 0.00060098 |
| 10506335 | Pde4b         | NM 019840     | 0.00060393 |
| 10400304 | Egln3         | NM 028133     | 0.00060462 |
| 10488449 |               | ---           | 0.00060662 |
| 10578810 | Cicn3         | NM 173874     | 0.00060933 |
| 10367843 | Utrn          | NM 011682     | 0.00060985 |
| 10467068 | Sgms1         | NM 144792     | 0.00061153 |
| 10512067 | Ddx58         | NM 172689     | 0.00061181 |
| 10421293 | Ppp3cc        | NM 008915     | 0.00061237 |
| 10361091 | Atf3          | NM 007498     | 0.00061287 |
| 10475532 | Sqrdl         | NM 021507     | 0.00061423 |
| 10371220 | Gna15         | NM 010304     | 0.00061559 |
| 10435982 | Bta           | NM 001037719  | 0.00061806 |
| 10424670 | Hemt1         | NM 010416     | 0.00061813 |
| 10566366 | Al451617      | NM 199146     | 0.00061877 |
| 10399228 | Gm6742        | XR 030600     | 0.00062062 |
| 10500412 | Gpr89         | NM 026229     | 0.00062072 |
| 10412701 | 3830406C13Rik | NM 146051     | 0.00062282 |
| 10350819 | Csnk2a1       | NM 007788     | 0.00062291 |
| 10532921 | Spp13         | NM 029012     | 0.00062508 |
| 10595638 | 4930579C12Rik | ENSMUST000000 | 0.00062575 |
| 10376245 | Gria1         | NM 001113325  | 0.00062582 |
| 10500677 | Cd2           | NM 013486     | 0.00062584 |
| 10454782 | Egr1          | NM 007913     | 0.00062628 |
| 10340331 |               | ---           | 0.00062709 |
| 10572253 | Sf4           | NM 027481     | 0.00062813 |
| 10420637 | Kpna3         | NM 008466     | 0.00062938 |
| 10527573 |               | ---           | 0.00063214 |
| 10457223 | Cdh11         | NM 009866     | 0.00063401 |
| 10608680 |               | ---           | 0.00063417 |
| 10518364 | Gm13143       | XM 204069     | 0.00063581 |
| 10345807 | Ii18r1        | NM 008365     | 0.00063595 |
| 10493585 | Ube2a1        | NM 027315     | 0.00063738 |
| 10496182 | Cxsc4         | NM 001004367  | 0.00063802 |
| 10400210 | Hectd1        | NM 144788     | 0.00063928 |
| 10398635 | Amn           | NM 033603     | 0.00063974 |
| 10406598 | Serinc5       | NM 172588     | 0.00064    |
| 10414431 | Gapdh         | NM 008084     | 0.00064348 |
| 10341517 |               | ---           | 0.00064359 |
| 10433163 | Ppp1r1a       | NM 021391     | 0.00064665 |
| 10401278 | Erh           | NM 007951     | 0.00064924 |
| 10407481 | Pfkip         | NM 019703     | 0.00065083 |
| 10338056 |               | ---           | 0.00065132 |
| 10338037 |               | ---           | 0.00065169 |
| 10537296 |               | ---           | 0.00065189 |
| 10593526 | Atm           | NM 007499     | 0.00065193 |
| 10498076 | Maml3         | NM 001004176  | 0.00065276 |
| 10570356 | Tmco3         | NM 172282     | 0.00065299 |
| 10578904 | Cpe           | NM 013494     | 0.00065416 |
| 10400706 | Arf6          | ENSMUST000000 | 0.00065614 |
| 10480901 | Nacc2         | NM 001037098  | 0.00065814 |
| 10519607 | 4930420K17Rik | BC147127      | 0.00065911 |
| 10496379 | H2afz         | NM 016750     | 0.00066005 |
| 10422075 | Mycbp2        | NM 207215     | 0.00066602 |
| 10407300 | 4930444M13Rik | ENSMUST000000 | 0.00066603 |
| 10482301 | Scai          | NM 178778     | 0.00066616 |
| 10475144 | Capn3         | NM 007601     | 0.00066617 |
| 10374821 | Smek2         | NM 134034     | 0.00066639 |
| 10424781 | Grina         | NM 023168     | 0.00066627 |
| 10413977 | Gm626         | XM 985917     | 0.00066743 |
| 10559389 | Mraprd        | NM 203490     | 0.0006677  |
| 10592493 | 4931429I11Rik | NM 001081121  | 0.00066783 |
| 10430871 | Tdq           | NM 011561     | 0.00066898 |
| 10495873 | Ptma          | NM 008972     | 0.00067196 |
| 10366705 | Gm9081        | XR 030920     | 0.00067465 |
| 10473022 | Pfip2         | NM 019755     | 0.00067467 |
| 10540472 | Bhlhe40       | NM 011498     | 0.00067764 |
| 10466837 |               | ---           | 0.00067959 |
| 10492558 | Smc4          | NM 133786     | 0.00068027 |
| 10507475 |               | ---           | 0.00068033 |
| 10560202 | Gltscr1       | NM 001081418  | 0.00068046 |
| 10471677 | Dab2ip        | NM 001114124  | 0.00068077 |
| 10422026 | 1700110M21Rik | NM 029680     | 0.00068184 |
| 10412394 | Nnt           | NR 003544     | 0.00068325 |
| 10451993 | D17Wsu104e    | NM 080837     | 0.00068343 |
| 10451004 | Cd3ap         | NM 009847     | 0.00068344 |
| 10419323 | Dgap5         | NM 144553     | 0.00068745 |
| 10456754 | Gm10532       | ENSMUST000000 | 0.00068778 |
| 10458195 | Cdc25c        | NM 009860     | 0.00069024 |
| 10505451 | Orm2          | NM 011016     | 0.00069113 |
| 10475487 | Sic28a2       | NM 172980     | 0.00069514 |
| 10436203 | Gm4416        | XM 001478876  | 0.00069517 |

|          |               |               |            |
|----------|---------------|---------------|------------|
| 10515884 | Pp1h          | NM_028677     | 0.0006956  |
| 10448186 | Zfp820        | NM_029281     | 0.00069586 |
| 10488584 | 4930556L07Rik | AK016149      | 0.00069611 |
| 10362454 | Trdn          | NM_029726     | 0.00069677 |
| 10408111 | Hist1h2ao     | NM_178185     | 0.00069767 |
| 10582719 | Sipa1l2       | NM_001081337  | 0.00069772 |
| 10573261 | Asf1b         | NM_024184     | 0.00069775 |
| 10376060 | Irf1          | NM_008390     | 0.0006989  |
| 10605315 | Lage3         | NM_025410     | 0.00069984 |
| 10500896 | H3f3b         | NM_008211     | 0.00069987 |
| 10403834 | Sfrp4         | NM_016687     | 0.00070169 |
| 10523231 | Art3          | NM_181728     | 0.0007017  |
| 10389143 | Sifn8         | NM_181545     | 0.00070217 |
| 10484894 | Ptprj         | NM_008982     | 0.00070438 |
| 10459844 | Haus1         | NM_146089     | 0.0007051  |
| 10589912 | Pctk1         | NM_011049     | 0.00070512 |
| 10472235 | Dapl1         | NM_029723     | 0.0007052  |
| 10348180 | Erf4e2        | NM_001039169  | 0.00070666 |
| 10398459 | Ppp2r5c       | NM_001135001  | 0.00070725 |
| 10408072 | Hist1h2ao     | NM_178185     | 0.00070854 |
| 10455299 | Sh3f2         | NM_001146299  | 0.00070865 |
| 10403955 | Hist1h2ao     | NM_178185     | 0.00070869 |
| 10439514 | Gap43         | NM_008083     | 0.00070909 |
| 10408070 | RP23-38E20.1  | NM_001097979  | 0.00071111 |
| 10568328 | Vkorc1        | NM_178600     | 0.00071284 |
| 10351873 | Pyhin1        | NM_175026     | 0.00071291 |
| 10417174 | Wrb           | NM_027301     | 0.00071303 |
| 10587892 | Atr           | NM_019864     | 0.00071391 |
| 10486858 | Mfap1a        | NM_026220     | 0.00071632 |
| 10508151 | Clsn          | NM_175554     | 0.00071719 |
| 10558450 | Gm10578       | ENSMUST000000 | 0.00071732 |
| 10479950 | Cugbp2        | NM_001110231  | 0.00071815 |
| 10566233 | Olfre23       | NM_147122     | 0.00071835 |
| 10456254 | Nedd4l        | NM_001114386  | 0.00072286 |
| 10398267 | Evl           | NM_007965     | 0.00072403 |
| 10460833 | Ehd1          | NM_010119     | 0.00072405 |
| 10341112 | ---           | ---           | 0.00072438 |
| 10559261 | Cd91          | NM_133655     | 0.0007246  |
| 10515590 | Kdm4a         | NM_001161823  | 0.00072694 |
| 10408450 | Sox4          | NM_009238     | 0.00072727 |
| 10449303 | Bak1          | NM_007523     | 0.00072729 |
| 10547015 | 1500001M20Rik | NM_026894     | 0.00072884 |
| 10511139 | Ssu72         | NM_026899     | 0.00073004 |
| 10524790 | Cit           | NM_007708     | 0.00073032 |
| 10450101 | ---           | ---           | 0.00073175 |
| 10472042 | Gm13498       | AF390105      | 0.00073176 |
| 10497931 | Cfar          | NM_009805     | 0.00073188 |
| 10414417 | Peit2         | NM_037602     | 0.00073255 |
| 10387180 | Ndel1         | NM_023668     | 0.00073277 |
| 10414271 | Pter2         | NM_008964     | 0.00073358 |
| 10504470 | Melk          | NM_010790     | 0.00073376 |
| 10508936 | Ubxn11        | NM_026257     | 0.00073499 |
| 10483246 | ---           | ---           | 0.00073576 |
| 10348277 | Atg16l1       | NM_029846     | 0.00073787 |
| 10405234 | Snrpd2        | NM_026943     | 0.00073858 |
| 10474541 | Nop10         | NM_025403     | 0.00074098 |
| 10595189 | Sic17a5       | NM_172773     | 0.00074118 |
| 10560117 | Gm6955        | ENSMUST000000 | 0.00074647 |
| 10408666 | Rap40         | NM_145938     | 0.00074717 |
| 10498595 | Snrpd2        | NM_026943     | 0.00075233 |
| 10358928 | Cacna1e       | NM_009782     | 0.00075332 |
| 10505643 | 4930473A06Rik | BC039810      | 0.00075376 |
| 10384522 | Actr2         | NM_146243     | 0.00075464 |
| 10583320 | BC017612      | NM_133214     | 0.00075574 |
| 10362456 | Trdn          | NM_029726     | 0.00075578 |
| 10429444 | Gm628         | ENSMUST000000 | 0.00075746 |
| 10339457 | ---           | ---           | 0.00075937 |
| 10375402 | Adam19        | NM_009616     | 0.00076055 |
| 10397450 | Vash1         | NM_177354     | 0.00076123 |
| 10473491 | Olfrl033      | NM_146578     | 0.00076493 |
| 10408156 | V1rh14        | NM_134239     | 0.00076589 |
| 10439312 | Cd86          | NM_019388     | 0.00076618 |
| 10495668 | 4930432M17Rik | ENSMUST000000 | 0.00076638 |
| 10372716 | Rap1b         | NM_024457     | 0.0007667  |
| 10425903 | Gapdh         | BC092294      | 0.0007682  |
| 10511290 | Tnfrsf18      | NM_009400     | 0.0007684  |
| 10428648 | Taf2          | NM_001081288  | 0.00076919 |
| 10465895 | Fads2         | NM_019699     | 0.00076962 |
| 10433088 | Cbx5          | NM_007626     | 0.00077092 |
| 10408210 | Hist1h2bc     | NM_023422     | 0.00077107 |
| 10480064 | Fbxo18        | NM_015792     | 0.00077137 |
| 10343809 | ---           | ---           | 0.00077195 |
| 10480601 | A830007P12Rik | BC013092      | 0.00077256 |
| 10557342 | Il21r         | NM_021887     | 0.0007728  |
| 10390640 | Irf3          | NM_011771     | 0.00077342 |
| 10580486 | Brd7          | NM_012047     | 0.00077369 |
| 10361869 | Nhs1          | NM_173390     | 0.00077402 |
| 10537078 | Mkin1         | NM_013791     | 0.00077687 |
| 10446253 | Vav1          | NM_011691     | 0.00077692 |
| 10392953 | Gaa3          | NM_1773048    | 0.00077723 |
| 10412650 | Rctd6         | NM_027782     | 0.00077966 |
| 10485989 | Aqr           | NM_009702     | 0.00078106 |
| 10587486 | Set           | NM_023871     | 0.00078132 |
| 10424804 | Exosc4        | NM_175399     | 0.0007823  |
| 10539813 | Ccdc48        | NM_001159697  | 0.00078251 |
| 10383198 | ---           | ---           | 0.00078267 |
| 10391963 | Nsf           | NM_008740     | 0.00078348 |
| 10344170 | ---           | ---           | 0.00078621 |
| 10542636 | Pyroxd1       | NM_183165     | 0.00078644 |
| 10566574 | Gvin1         | NM_029000     | 0.00078764 |
| 10408225 | Hist1h4c      | NM_178208     | 0.00078868 |
| 10343204 | ---           | ---           | 0.00078946 |
| 10587942 | Xrn1          | NM_011916     | 0.00079    |
| 10590623 | Cxcr6         | NM_030712     | 0.00079238 |
| 10554817 | Gapdh         | NM_008084     | 0.00079399 |
| 10409767 | Golm1         | NM_027307     | 0.00079578 |
| 10510061 | Pramef8       | BC056931      | 0.00079707 |
| 10532150 | Fam69a        | NM_026062     | 0.00079928 |
| 10607002 | Gm7091        | XR_031774     | 0.00080007 |
| 10504375 | Npr2          | NM_173788     | 0.00080055 |
| 10362310 | Ube2l3        | NM_009456     | 0.00080095 |
| 10524150 | Ankle2        | NM_027922     | 0.00080111 |
| 10565241 | 1700026D08Rik | BC061016      | 0.0008032  |
| 10366703 | Gm4801        | XM_137324     | 0.00080381 |
| 10532624 | Myo18b        | NM_028901     | 0.00080481 |
| 10387372 | Kdm6b         | NM_001017426  | 0.00080561 |
| 10444911 | Mdc1          | NM_001010833  | 0.00080642 |
| 10568050 | Aldoa         | NM_007438     | 0.00080819 |
| 10562059 | Cox6b1        | NM_025628     | 0.00080882 |
| 10364511 | 9130017N09Rik | BC013508      | 0.00080845 |
| 10360920 | Tgfb2         | NM_009367     | 0.00080885 |
| 10364950 | Gad45b        | NM_008655     | 0.00080887 |
| 10564573 | Chd2          | NM_001081345  | 0.00081083 |
| 10395702 | Akap6         | NM_198111     | 0.00081133 |
| 10338287 | ---           | ---           | 0.0008118  |
| 10554549 | Whamm         | NM_001004185  | 0.00081603 |
| 10563037 | Scaf1         | NM_001008422  | 0.0008165  |
| 10388591 | Cpd           | NM_007754     | 0.0008165  |

|          |               |               |            |
|----------|---------------|---------------|------------|
| 10592705 | Pou2f3        | NM_011139     | 0.00081788 |
| 10536220 | Col1a2        | NM_007743     | 0.00081978 |
| 10444780 | H2-D1         | NM_010380     | 0.00081992 |
| 10482432 | Gapdh         | NM_008084     | 0.00082018 |
| 10375019 | Nsg2          | NM_008741     | 0.00082124 |
| 10415645 | Hmrf3         | NM_026401     | 0.00082174 |
| 10345074 | Cetn4         | NM_145825     | 0.00082215 |
| 10357008 | Pign          | NM_013784     | 0.00082399 |
| 10344398 | ---           | ---           | 0.00082482 |
| 10432411 | Mcrs1         | NM_016766     | 0.00082596 |
| 10350159 | Lad1          | NM_133664     | 0.00082634 |
| 10561806 | Mif           | NM_010798     | 0.00082662 |
| 10412251 | Ndufs4        | NM_010887     | 0.00082841 |
| 10599348 | Gria3         | NM_016886     | 0.00082882 |
| 10499716 | Ubap2l        | NM_028475     | 0.00083004 |
| 10500928 | Capza1        | NM_009797     | 0.00083081 |
| 10506154 | Alig6         | NM_001081264  | 0.00083116 |
| 10555885 | ---           | ---           | 0.00083433 |
| 10561302 | Pgam1         | NM_023418     | 0.00083449 |
| 10382502 | Cdr2l         | NM_001080929  | 0.00083526 |
| 10559766 | Zfp583        | NM_001033249  | 0.00083835 |
| 10549282 | Itpr2         | NM_019923     | 0.0008397  |
| 10547943 | Ncapd2        | NM_146171     | 0.00084027 |
| 10369264 | Oit3          | NM_010959     | 0.00084114 |
| 10562685 | ---           | ---           | 0.00084134 |
| 10604597 | Rps17         | NM_009092     | 0.00084159 |
| 10496015 | Hist1h2af     | NM_175661     | 0.00084207 |
| 10573172 | Clgn          | NM_009904     | 0.00084606 |
| 10528702 | Prkag2        | NM_145401     | 0.00084606 |
| 10592816 | Hmbs          | NM_013551     | 0.00084667 |
| 10511382 | Nsmaf         | NM_010945     | 0.00084774 |
| 10352554 | ---           | ---           | 0.00084793 |
| 10443690 | Glpl1         | NM_021332     | 0.00084811 |
| 10338460 | ---           | ---           | 0.00085059 |
| 10566241 | Olfrr630      | NM_147098     | 0.00085195 |
| 10606355 | Cysltr1       | NM_021476     | 0.00085251 |
| 10365428 | Btbd11        | NM_028709     | 0.00085315 |
| 10468517 | Mxi1          | NM_010847     | 0.00085336 |
| 10488145 | ---           | ---           | 0.00085344 |
| 10550521 | Mypop         | NM_145579     | 0.00085559 |
| 10498345 | Gpr171        | NM_173398     | 0.00085782 |
| 10419611 | Supt16h       | NM_033618     | 0.00086206 |
| 10378697 | Myo1c         | NM_008659     | 0.00086208 |
| 10373740 | Pik3ip1       | NM_178149     | 0.00086466 |
| 10343617 | ---           | ---           | 0.00086477 |
| 10384102 | Npc1l1        | NM_207242     | 0.00086524 |
| 10462140 | Dock8         | NM_028785     | 0.00086635 |
| 10496015 | Pla2g12a      | NM_183423     | 0.00086671 |
| 10373651 | Olfrr14       | ENSMUST000000 | 0.00086781 |
| 10350343 | Atf6v1g3      | NM_177397     | 0.00086962 |
| 10514054 | Nfib          | NM_001113209  | 0.00086973 |
| 10518145 | Prdm2         | ENSMUST000000 | 0.00087039 |
| 10412064 | ---           | ---           | 0.00087228 |
| 10580219 | Calr          | NM_007591     | 0.00087223 |
| 10413987 | Gm626         | XM_985917     | 0.0008739  |
| 10586604 | Rps27l        | NM_026467     | 0.00087566 |
| 10486203 | Ino80         | NM_026574     | 0.00087851 |
| 10370573 | Theg          | NM_011583     | 0.00087946 |
| 10544768 | Hoxa5         | NM_010453     | 0.00087951 |
| 10355329 | Bard1         | NM_007525     | 0.00087998 |
| 10363161 | 6330442E10Rik | BC079613      | 0.00087998 |
| 10568464 | Ate1          | NM_013799     | 0.00088007 |
| 10485667 | Dnajc24       | NM_026992     | 0.00088092 |
| 10351658 | Cd48          | NM_007649     | 0.00088333 |
| 10607206 | Il13ra2       | NM_008356     | 0.00088555 |
| 10565775 | Dgat2         | NM_026384     | 0.00088623 |
| 10414984 | Gm13892       | ENSMUST000000 | 0.00088778 |
| 10582599 | Nup133        | NM_172288     | 0.00088883 |
| 10541307 | Usp18         | NM_011909     | 0.00088919 |
| 10429957 | Fbx6          | NM_013909     | 0.00088952 |
| 10367579 | LOC100045113  | XM_001473697  | 0.00088988 |
| 10420860 | Elp3          | NM_028811     | 0.00089128 |
| 10349376 | ---           | ---           | 0.00089211 |
| 10591369 | Dnmt1         | NM_010066     | 0.00089236 |
| 10431872 | Sic38a1       | ENSMUST000000 | 0.00089316 |
| 10366848 | B4galnt1      | NM_008080     | 0.00089327 |
| 10599317 | Rhox13        | ENSMUST000000 | 0.00089399 |
| 10467650 | Frat2         | NM_177603     | 0.00089742 |
| 10575976 | Crispld2      | NM_030209     | 0.00089795 |
| 10602590 | ---           | ---           | 0.00090147 |
| 10384183 | Nacad         | NM_001081652  | 0.00090277 |
| 10586130 | Aggab         | BC027311      | 0.00090461 |
| 10496295 | Ube2d3        | NM_025356     | 0.00090564 |
| 10489660 | Elmo2         | NM_207706     | 0.00090571 |
| 10569485 | Tnfrsf26      | NM_175649     | 0.00090664 |
| 10481678 | 6330409D20Rik | ENSMUST000000 | 0.00090665 |
| 10598207 | ---           | ---           | 0.00090854 |
| 10491136 | Tnik          | NM_026910     | 0.00091011 |
| 10591781 | Anln          | NM_028390     | 0.00091214 |
| 10484371 | Calcr1        | NM_018782     | 0.00091577 |
| 10344807 | Cspg1         | NM_026493     | 0.00091629 |
| 10373684 | Vmn2r86       | NM_001103365  | 0.00091631 |
| 10343552 | ---           | ---           | 0.00091815 |
| 10400504 | Foxa1         | NM_008259     | 0.00091848 |
| 10488322 | A230067G21Rik | NM_001033348  | 0.00092062 |
| 10562132 | Cd22          | NM_001043317  | 0.00092119 |
| 10499655 | Il6ra         | NM_010559     | 0.00092177 |
| 10409508 | Ddx41         | NM_134059     | 0.00092225 |
| 10492231 | Med12l        | NM_177855     | 0.00092274 |
| 10361807 | Hivep2        | NM_010437     | 0.00092416 |
| 10355152 | Fzd5          | NM_022721     | 0.00092499 |
| 10552210 | Ankrd27       | NM_145633     | 0.00092569 |
| 10501143 | Ahcy1         | NM_145542     | 0.00092594 |
| 10557213 | Rbbp6         | NM_011247     | 0.00092661 |
| 10608721 | ---           | ---           | 0.00092755 |
| 10492172 | ---           | ---           | 0.0009279  |
| 10429140 | Ndrp1         | NM_008681     | 0.00092811 |
| 10408085 | Hist1h2an     | NM_178184     | 0.00092936 |
| 10561799 | Zfp74         | NM_178384     | 0.00093231 |
| 10481835 | Lmx1b         | NM_010725     | 0.00093387 |
| 10360018 | Fcrla         | NM_001160215  | 0.00093399 |
| 10562847 | Nrlh2         | NM_009473     | 0.00093497 |
| 10603151 | Gpm6b         | NM_023122     | 0.00093537 |
| 10470186 | Lcn14         | NM_001099301  | 0.00093539 |
| 10382912 | 09-Sep        | NM_001113486  | 0.00093556 |
| 10398173 | Vrk1          | NM_011705     | 0.00093559 |
| 10409799 | Isca1         | NM_026921     | 0.00093813 |
| 10432101 | Senp1         | NM_144851     | 0.00093841 |
| 10457359 | Mpp7          | NM_001081287  | 0.00093841 |
| 10504817 | Tgfr1         | NM_009370     | 0.00093842 |
| 10597518 | Tgfr2         | NM_009371     | 0.00093883 |
| 10566097 | Nup98         | NM_022979     | 0.00093899 |
| 10383365 | Hgs           | NM_001159328  | 0.00094072 |
| 10428728 | 9330154K18Rik | ENSMUST000000 | 0.00094267 |
| 10530787 | Aasdh         | NM_173765     | 0.00094329 |
| 10559297 | Sic22a18      | NM_001042760  | 0.00094492 |
| 10515431 | Kif2c         | NM_134471     | 0.00094578 |
| 10538588 | Gm5569        | NM_001101533  | 0.00094622 |

|          |               |              |            |
|----------|---------------|--------------|------------|
| 10447395 | Msh2          | NM_008628    | 0.00094631 |
| 10423185 | Rnasen        | NM_001130149 | 0.00094667 |
| 10569569 | Cttn          | NM_007803    | 0.0009503  |
| 10463121 | Zfp518        | NM_028319    | 0.00095036 |
| 10480329 | Dnajc1        | NM_007869    | 0.00095048 |
| 10468691 | Abim1         | NM_178688    | 0.00095515 |
| 10427454 | Card6         | ENSMUST00000 | 0.00095706 |
| 10472501 | Lass6         | NM_172856    | 0.00095777 |
| 10521626 | Cc2d2a        | NM_172274    | 0.00095852 |
| 10389526 | Cltc          | NM_001003908 | 0.00095879 |
| 10521090 | Tacc3         | NM_001040435 | 0.00095915 |
| 10580033 | Cd97          | NM_011925    | 0.00096    |
| 10561247 | Shkbp1        | NM_138676    | 0.00096064 |
| 10361031 | Rps6kc1       | NM_178775    | 0.00096091 |
| 10398147 | Papola        | NM_011112    | 0.00096352 |
| 10572949 | Nr3c2         | NM_001083906 | 0.00096428 |
| 10458138 | Brd8          | NM_030147    | 0.00096517 |
| 10378802 | Blmh          | NM_178645    | 0.00096581 |
| 10428998 | Asap1         | NM_010026    | 0.00096616 |
| 10380732 | Mrpl10        | NM_026154    | 0.00096644 |
| 10441032 | Cldn14        | NM_019500    | 0.00096698 |
| 10503551 | Usp45         | NM_152825    | 0.00096707 |
| 10592725 | Gm10688       | ENSMUST00000 | 0.00096741 |
| 10372457 | Tbc1d15       | NM_025706    | 0.00097062 |
| 10522658 | C530008M17Rik | ENSMUST00000 | 0.0009712  |
| 10395672 | Ap4s1         | NM_021710    | 0.00097154 |
| 10545958 | Aha4          | NM_013471    | 0.00097256 |
| 10584941 | Bace1         | NM_011792    | 0.00097286 |
| 10524284 | Ttc28         | BC046779     | 0.00097288 |
| 10545154 | Il23r         | NM_144548    | 0.00097377 |
| 10494972 | Bcl2l15       | NM_001142959 | 0.00097486 |
| 10474064 | Trp53l11      | NM_001025246 | 0.00097638 |
| 10551252 | Nlrp9a        | NM_001048219 | 0.0009765  |
| 10428857 | Mtss1         | NM_001146180 | 0.00097701 |
| 10440543 | Rnf160        | NM_001081068 | 0.00097826 |
| 10340932 | ---           | ---          | 0.00097978 |
| 10392901 | Relggs2       | NM_001159965 | 0.00098046 |
| 10531193 | Adamts3       | NM_001081401 | 0.00098194 |
| 10563709 | Mrgpra1       | NM_153095    | 0.00098202 |
| 10342392 | ---           | ---          | 0.00098287 |
| 10340326 | ---           | ---          | 0.000984   |
| 10559498 | 9430041J12Rik | AK051461     | 0.00098446 |
| 10564813 | Mesp1         | NM_008588    | 0.00098503 |
| 10343572 | ---           | ---          | 0.00098582 |
| 10405994 | Med10         | NM_138596    | 0.00098725 |
| 10360373 | E030037K03Rik | ENSMUST00000 | 0.00098762 |
| 10390869 | Krt39         | NM_213730    | 0.00099154 |
| 1038947  | Gawdh         | NM_008084    | 0.00099245 |
| 10371321 | Slc11a2       | NM_177388    | 0.00099536 |
| 10535053 | Prkar1b       | NM_008923    | 0.00099556 |
| 10343937 | ---           | ---          | 0.00099795 |
| 10603180 | Chchd5        | BC027303     | 0.00099823 |
| 10569278 | 5530400B01Rik | ENSMUST00000 | 0.00100176 |
| 10454212 | Mep1b         | NM_008586    | 0.00100502 |
| 10554693 | Stard5        | NM_023377    | 0.00100553 |
| 10504132 | Ccl19         | NM_011888    | 0.00100646 |
| 10410259 | Uqcrb         | NM_026219    | 0.00100817 |
| 10404063 | Hist1h2ab     | NM_175660    | 0.00100914 |
| 10401238 | Zfp361        | NM_007564    | 0.00101155 |
| 10476252 | Cdc25b        | NM_023117    | 0.00101265 |
| 10390635 | 1810046J19Rik | NM_025559    | 0.00101295 |
| 10590628 | Ccr3          | NM_009914    | 0.00101564 |
| 10348301 | Sag           | NM_009118    | 0.00101639 |
| 10464504 | Lrp5          | NM_008513    | 0.00101972 |
| 10343477 | ---           | ---          | 0.00102044 |
| 10385236 | Akr1b3        | NM_009658    | 0.00102142 |
| 10531114 | Dhx57         | NM_198942    | 0.00102254 |
| 10571696 | Casp3         | NM_009810    | 0.00102335 |
| 10443561 | 1300018I05Rik | BC024691     | 0.00102388 |
| 10500685 | Atp1a1        | NM_144900    | 0.00102586 |
| 10500157 | Setdb1        | NM_018877    | 0.00102665 |
| 10414754 | Tcra          | BC147846     | 0.001027   |
| 10414860 | Tcra          | BC147846     | 0.001027   |
| 10338145 | ---           | ---          | 0.0010297  |
| 10447128 | Gm6594        | XM_890094    | 0.00103161 |
| 10354768 | Akr1b3        | NM_009658    | 0.00103332 |
| 10592217 | Stt3a         | NM_008408    | 0.00103437 |
| 10410264 | Mterfd1       | NM_025547    | 0.00103472 |
| 10598238 | ---           | ---          | 0.0010348  |
| 10447383 | Epcam         | NM_008532    | 0.00103532 |
| 10501971 | Ank2          | NM_178655    | 0.00103766 |
| 10484612 | Olfrl1079     | NM_146407    | 0.00104207 |
| 10442141 | V1re5         | NM_134194    | 0.00104297 |
| 10535883 | Katnal1       | NM_153572    | 0.00104622 |
| 10589938 | Gpd1l         | NM_175380    | 0.00104696 |
| 10601659 | Srpx2         | NM_026838    | 0.00104774 |
| 10424493 | Tg            | NM_009375    | 0.00104799 |
| 10344446 | ---           | ---          | 0.00104826 |
| 10513156 | Ptpn3         | NM_011207    | 0.00105025 |
| 10420198 | Ripk3         | NM_011995    | 0.00105254 |
| 10544660 | Osbpl3        | NM_027881    | 0.00105263 |
| 10381072 | Cdc6          | NM_011799    | 0.00105365 |
| 10466314 | Gm6545        | XM_889589    | 0.00105508 |
| 10582008 | 2310061C15Rik | NM_026844    | 0.0010551  |
| 10587262 | Kih131        | NM_172925    | 0.00105755 |
| 10341477 | ---           | ---          | 0.00105864 |
| 10385572 | Sqstm1        | NM_011018    | 0.00105878 |
| 10530692 | Kdr           | NM_010612    | 0.00105887 |
| 10597427 | Trim71        | NM_001042503 | 0.00105981 |
| 10363894 | Ipmk          | NM_027184    | 0.00106196 |
| 10438071 | Ppil2         | NM_144954    | 0.00106038 |
| 10549875 | Olfrl1350     | NM_146389    | 0.00106071 |
| 10397428 | 1700020O03Rik | BC048169     | 0.00106107 |
| 10520483 | D5Wsu178e     | NM_027652    | 0.00106163 |
| 10474335 | Immp1l        | NM_028260    | 0.00106602 |
| 10449839 | Akap8         | NM_019774    | 0.00106865 |
| 10415293 | Rnf31         | NM_194346    | 0.0010688  |
| 10441973 | Tbp           | NM_013684    | 0.00107127 |
| 10605113 | L1cam         | NM_008478    | 0.00107601 |
| 10392328 | Nol1          | NM_133702    | 0.00107828 |
| 10393408 | Tnfr6         | NM_145439    | 0.00107948 |
| 10498313 | Pgk1          | NM_008828    | 0.00107971 |
| 10399379 | Pgk1          | NM_008828    | 0.00107971 |
| 10555460 | Stard10       | NM_019990    | 0.001081   |
| 10523206 | Uso1          | NM_019490    | 0.00108133 |
| 10428908 | ---           | ---          | 0.00108155 |
| 10371811 | Scyl2         | NM_198021    | 0.00108175 |
| 10434523 | Poir2h        | NM_145632    | 0.00108228 |
| 10384223 | Igfbb3        | NM_008343    | 0.00108231 |
| 10446441 | Ddx11         | NM_001003919 | 0.00108439 |
| 10459944 | Nfatc1        | NM_198429    | 0.00108534 |
| 10530536 | Tec           | NM_001113460 | 0.0010857  |
| 10543522 | Gm5303        | XR_033050    | 0.00108594 |
| 10428936 | ---           | ---          | 0.00108847 |
| 10533003 | 1110006O24Rik | NR_027810    | 0.00109198 |
| 10346365 | Sgol2         | NM_199007    | 0.00109245 |
| 10455970 | BC023105      | BC023105     | 0.00109492 |
| 10524098 | Zfp605        | BC007165     | 0.00109514 |

|          |               |               |            |
|----------|---------------|---------------|------------|
| 10526113 | Crcp          | NM 007761     | 0.00109609 |
| 10370376 | Pfkl          | NM 008826     | 0.00109693 |
| 10489985 | Atp9a         | NM 015731     | 0.00110127 |
| 10443940 | Zfp422-rs1    | NM 029952     | 0.00110184 |
| 10522716 | Polr2b        | NM 153798     | 0.00110194 |
| 10568461 | Rfxnd3        | NM 146218     | 0.00110511 |
| 10525983 | Ran           | NM 009391     | 0.00110552 |
| 10423842 | Dcaf13        | NM 198606     | 0.00110578 |
| 10524515 | Myo1h         | BC144867      | 0.00110667 |
| 10367076 | Prim1         | NM 008921     | 0.00110754 |
| 10489440 | Wfdc15a       | NM 183271     | 0.00110802 |
| 10340098 |               | ---           | 0.00110937 |
| 10463930 | Mxi1          | NM 010847     | 0.00110965 |
| 10474545 | Slc12a6       | NM 133649     | 0.00111083 |
| 10569017 | Jfitm3        | NM 025378     | 0.00111112 |
| 10425522 | Rbx1          | NM 019712     | 0.00111756 |
| 10353878 | Ankrk23       | NM 152502     | 0.00111842 |
| 10514221 | Plin2         | NM 007408     | 0.00111848 |
| 10503182 | Chd7          | NM 001081417  | 0.00111879 |
| 10494662 | Ywhah         | NM 011738     | 0.00112338 |
| 10514340 | Cdkn2a        | NM 001040654  | 0.00112416 |
| 10449741 | Sik1          | NM 010831     | 0.00112616 |
| 10567739 | 4933440M02Rik | ENSMUST000000 | 0.00112639 |
| 10476759 | Rin2          | NM 028724     | 0.00112648 |
| 10341395 |               | ---           | 0.00112829 |
| 10348829 | Farp2         | NM 145519     | 0.00112922 |
| 10557201 | Cacng3        | NM 019430     | 0.00113256 |
| 10506500 | Usp24         | ENSMUST000000 | 0.00113359 |
| 10434281 | LOC635992     | ENSMUST000000 | 0.00113723 |
| 10538135 | Gimap7        | NM 146167     | 0.00113726 |
| 10436600 |               | ---           | 0.00113738 |
| 10410295 | Zfp595        | NM 177622     | 0.00113758 |
| 10552341 | Vmn2r60       | NM 001105057  | 0.00113776 |
| 10544114 | Hipk2         | NM 010433     | 0.00113888 |
| 10472050 | Tnfaip6       | NM 009398     | 0.00114114 |
| 10425834 | Samm50        | NM 178614     | 0.00114349 |
| 10373372 | Coo10a        | NM 001081040  | 0.00114514 |
| 10530224 | Cd3e          | NM 007648     | 0.00114572 |
| 10546152 | Podxl2        | NM 176973     | 0.00114683 |
| 10419977 | Ap1q2         | NM 007455     | 0.00115141 |
| 10351679 | Cd84          | NM 013489     | 0.00115156 |
| 10556067 | Syt9          | NM 021889     | 0.00115187 |
| 10434029 | Lztr1         | NM 025808     | 0.00115327 |
| 10360173 | Slamf7        | NM 144539     | 0.00115329 |
| 10476728 | Dtd1          | NM 025314     | 0.00115572 |
| 10457872 | Slc39a6       | NM 139143     | 0.00115625 |
| 10542477 | Pik3c2g       | NM 207683     | 0.00115688 |
| 10608664 |               | ---           | 0.00115682 |
| 10552566 | Klk1b9        | NM 010116     | 0.00115777 |
| 10524312 | Ttc28         | ENSMUST000000 | 0.00115781 |
| 10566229 | Olfrc624      | NM 001011865  | 0.00115817 |
| 10353679 | Gm5697        | XR 004787     | 0.00115825 |
| 10503123 | Ubxn2b        | NM 026534     | 0.00115945 |
| 10379953 | 4632419I22Rik | BC067002      | 0.00115993 |
| 10434384 | Ap2m1         | NM 009679     | 0.00116006 |
| 10579769 | Gapdh         | NM 008084     | 0.00116068 |
| 10404132 | Cmah          | NM 001111110  | 0.00116091 |
| 10457546 | Osbpl1a       | NM 207530     | 0.00116098 |
| 10427369 | Pde1b         | NM 008800     | 0.00116166 |
| 10346235 | Hibch         | NM 146108     | 0.00116286 |
| 10359762 | Rcsd1         | NM 178593     | 0.00116541 |
| 10359828 | Gm4847        | ENSMUST000000 | 0.00116778 |
| 10539486 | Zfml          | NM 008717     | 0.00117087 |
| 10414703 |               | ---           | 0.00117193 |
| 10482509 | Rbm43         | NM 001141981  | 0.00117242 |
| 10344624 | Lypla1        | NM 008866     | 0.00117245 |
| 10598996 | Gm5124        | NM 198633     | 0.00117246 |
| 10427402 | Ghr           | NM 010284     | 0.00117284 |
| 10341146 |               | ---           | 0.00117308 |
| 10577910 | Fnta          | NM 008033     | 0.00117445 |
| 10575775 | 4933407C03Rik | BC158118      | 0.00117491 |
| 10502638 | Ctca5         | NM 178697     | 0.00117498 |
| 10471929 | Arhqap15      | NM 153820     | 0.00117526 |
| 10352503 | Bpnt1         | NM 011794     | 0.00117658 |
| 10367154 | Gls2          | NM 001033264  | 0.00117766 |
| 10472128 | Arf6ip6       | NM 022989     | 0.00117859 |
| 10343835 |               | ---           | 0.00117874 |
| 10532103 | Glmn          | NM 133248     | 0.00117904 |
| 10383351 | Gm9981        | ENSMUST000000 | 0.00118194 |
| 10529953 | Gm10048       | AK036906      | 0.00118197 |
| 10566690 | Olfrc493      | NM 146310     | 0.00118732 |
| 10571325 | Mfhas1        | NM 001081279  | 0.00118798 |
| 10600169 | Bgn           | NM 007542     | 0.00118888 |
| 10344817 | Cspp1         | NM 026493     | 0.00118902 |
| 10351293 | Dpt           | NM 019759     | 0.00119635 |
| 10558001 | Inpp5f        | NM 178641     | 0.00119685 |
| 10484249 | Cwc22         | NM 030560     | 0.00119853 |
| 10373407 | Esvt1         | NM 011843     | 0.00119931 |
| 10376021 | 08-Sep        | NM 033144     | 0.00120111 |
| 10341450 |               | ---           | 0.00120171 |
| 10471655 | Gsn           | NM 146120     | 0.00120234 |
| 10369479 | Lrrc20        | ENSMUST000000 | 0.00120479 |
| 10373054 | Slc26a10      | BC089587      | 0.00120542 |
| 10527538 | Rasl11a       | NM 026864     | 0.00120577 |
| 10497487 |               | ---           | 0.00120815 |
| 10481349 | Ntnq2         | NM 133501     | 0.00121007 |
| 10499552 | Efna4         | NM 007910     | 0.00121196 |
| 10358717 | 1700025G04Rik | NM 197990     | 0.00121203 |
| 10471608 | Cep110        | NM 012018     | 0.00121278 |
| 10600082 | Nsdh1         | NM 010941     | 0.00121393 |
| 10338726 |               | ---           | 0.00121526 |
| 10548563 | Ptp4a1        | NM 011200     | 0.00121831 |
| 10412981 | Sec24c        | NM 172596     | 0.00121881 |
| 10403229 | Itqb8         | NM 177290     | 0.00121931 |
| 10419638 | Chd8          | NM 201637     | 0.00122263 |
| 10594613 | Usp3          | NM 144937     | 0.00122319 |
| 10530142 | Klf3          | NM 008453     | 0.00122358 |
| 10392207 | Tex2          | NM 198292     | 0.00122481 |
| 10547830 | Tpi1          | NM 009415     | 0.00122595 |
| 10411107 | Cmya5         | ENSMUST000000 | 0.00123031 |
| 10399965 | F730043M19Rik | ENSMUST000000 | 0.00123261 |
| 10490946 | Hsp90aa1      | NM 010480     | 0.00123344 |
| 10338915 |               | ---           | 0.00123568 |
| 10395201 | Slc26a3       | NM 021353     | 0.00123598 |
| 10441167 | Lca5l         | NM 001001492  | 0.00123632 |
| 10395976 | Dnajb6        | NM 011847     | 0.00123663 |
| 10552681 | Josd2         | NM 025368     | 0.00124377 |
| 10549813 | Zfp444        | NM 001146024  | 0.00124666 |
| 10343655 |               | ---           | 0.00124831 |
| 10593842 | Tspan3        | NM 019793     | 0.00124951 |
| 10417144 | Timm8a2       | NM 001037744  | 0.00124989 |
| 10382010 | Dca7          | NM 027946     | 0.00125212 |
| 10550723 | Nkpd1         | BC118925      | 0.00125246 |
| 10605792 | Spin4         | NM 178753     | 0.00125361 |
| 10605790 | Gm371         | XM 905158     | 0.00125477 |
| 10548455 | Klra1         | NM 016659     | 0.00125525 |
| 10360026 | Uqcrb         | NM 026219     | 0.00125605 |
| 10414156 | 4930474N05Rik | BC096580      | 0.00125728 |

|          |               |               |            |
|----------|---------------|---------------|------------|
| 10518837 | Camta1        | NM 001081557  | 0.0012573  |
| 10527024 | Gm10091       | ENSMUST000000 | 0.00125831 |
| 10568605 | Ctbp2         | NM 009980     | 0.00126044 |
| 10440258 | Epha3         | NM 010140     | 0.00126113 |
| 10384123 | Ddx56         | NM 026538     | 0.00126131 |
| 10546294 | Nup210        | NM 019815     | 0.00126167 |
| 10531794 | Wdfy3         | AB093277      | 0.00126267 |
| 10394560 | Smc6          | NM 025695     | 0.00126307 |
| 10523923 | Ccdc18        | NM 028481     | 0.00126317 |
| 10543360 | Gm5301        | XM 621704     | 0.00126423 |
| 10443550 | Rnf8          | NM 021419     | 0.0012643  |
| 10376986 | AU040829      | NM 001099288  | 0.00126555 |
| 10517165 | Gd52          | NM 013706     | 0.00126556 |
| 10382542 | Nup85         | NM 001002929  | 0.00127292 |
| 10391461 | Brc1          | NM 009764     | 0.00127335 |
| 10563722 | Mrgpra3       | NM 153067     | 0.001274   |
| 10461093 | Pla2g16       | NM 139269     | 0.00127412 |
| 10497689 | Gnb4          | NM 013531     | 0.00127433 |
| 10358299 | EG214403      | NM 001029977  | 0.00127584 |
| 10538148 | ---           | ---           | 0.00127758 |
| 10526693 | Zcwpw1        | NM 001005426  | 0.00128132 |
| 10462670 | Rpp30         | NM 019428     | 0.00128255 |
| 10603306 | ---           | ---           | 0.00128326 |
| 10569719 | A430078G23Rik | NM 001033378  | 0.00128543 |
| 10595169 | ---           | ---           | 0.00128719 |
| 10452867 | Dpy30         | NM 001146222  | 0.00129018 |
| 10445644 | 1700022C21Rik | BC027007      | 0.00129078 |
| 10463189 | Ankrd2        | NM 020033     | 0.00129274 |
| 10436873 | Son           | NM 178880     | 0.00129299 |
| 10507833 | Nt5c1a        | NM 001085502  | 0.00129318 |
| 10444312 | Btnl2         | NM 079835     | 0.00129813 |
| 10549447 | Ipo8          | NM 001081113  | 0.00129819 |
| 10361979 | Bclaf1        | NM 001025392  | 0.00129961 |
| 10566050 | Hl18bp        | NM 010531     | 0.00130265 |
| 10473281 | Itgav         | NM 008402     | 0.00130499 |
| 10463997 | Pdcd4         | NM 011050     | 0.00131121 |
| 10412559 | Slbp          | NM 009193     | 0.00131361 |
| 10509965 | Egr2          | NM 010139     | 0.00131445 |
| 10380381 | Tob1          | NM 009427     | 0.00131493 |
| 10449977 | 4921501E09Rik | NM 001009544  | 0.00131544 |
| 10546510 | Lrig1         | NM 008377     | 0.00131754 |
| 10349081 | Phlpp1        | BC059254      | 0.00131927 |
| 10511510 | Ints8         | NM 001159595  | 0.00131934 |
| 10498485 | Sic33a1       | NM 015728     | 0.00131996 |
| 10342513 | ---           | ---           | 0.00132165 |
| 10338256 | ---           | ---           | 0.00132268 |
| 10597461 | Cmtm7         | NM 133978     | 0.00132503 |
| 10477644 | Trp53imp2     | NM 178111     | 0.00132578 |
| 10344405 | ---           | ---           | 0.00132683 |
| 10525916 | Tmem132b      | ENSMUST000000 | 0.00132686 |
| 10531994 | Mpa2l         | NM 194336     | 0.0013285  |
| 10454441 | Syt4          | NM 009308     | 0.00132959 |
| 10339990 | ---           | ---           | 0.00133091 |
| 10606552 | Gm14920       | NM 001102665  | 0.00133328 |
| 10601553 | Gm14920       | NM 001102665  | 0.00133328 |
| 10402360 | Serpina10     | NM 144834     | 0.00133418 |
| 10529741 | Rab28         | NM 027295     | 0.00134304 |
| 10403899 | Olfra2        | NM 010984     | 0.00134614 |
| 10349453 | Rab3gap1      | NM 178600     | 0.00134636 |
| 10416037 | Pbk           | NM 023209     | 0.00134725 |
| 10340168 | ---           | ---           | 0.00134999 |
| 10339590 | ---           | ---           | 0.00135146 |
| 10343184 | ---           | ---           | 0.00135252 |
| 10576944 | Gm10067       | ENSMUST000000 | 0.00135398 |
| 10484777 | Olfrl1216     | NM 146893     | 0.00135409 |
| 10542875 | 3010003L21Rik | BC106181      | 0.00135606 |
| 10581378 | Psmb10        | NM 013640     | 0.00135616 |
| 10345200 | ---           | ---           | 0.00135733 |
| 10457745 | D030074E01Rik | NM 029491     | 0.00135828 |
| 10520698 | Dnajc5g       | NM 177677     | 0.0013585  |
| 10528480 | Gm6560        | XR 033533     | 0.00135891 |
| 10566452 | Gm4972        | XR 035686     | 0.00135904 |
| 10500329 | Hist2h2aa1    | NM 013549     | 0.00135933 |
| 10486616 | Ubr1          | NM 009461     | 0.00135979 |
| 10551614 | Ech1          | NM 016772     | 0.00136055 |
| 10404071 | Mrpl39        | NM 017404     | 0.00136389 |
| 10584582 | Gm10694       | ENSMUST000000 | 0.00136503 |
| 10437330 | Crebpb        | ENSMUST000000 | 0.00136692 |
| 10425321 | Apohec3       | NM 001160415  | 0.00136879 |
| 10466848 | D19Bwg1357e   | NM 177474     | 0.00136939 |
| 10368534 | Ncoar7        | NM 172495     | 0.00136971 |
| 10562905 | Atf5          | NM 030693     | 0.00137554 |
| 10460018 | Zfp236        | BC138187      | 0.00137715 |
| 10377681 | Dullard       | NM 026017     | 0.00137716 |
| 10409190 | Cenpp         | NM 025495     | 0.001378   |
| 10357155 | Inhbb         | NM 008381     | 0.00138028 |
| 10554839 | Picalm        | NM 146194     | 0.00138293 |
| 10537882 | Cul1          | NM 012042     | 0.00138408 |
| 10604879 | Gm6783        | XR 031567     | 0.0013842  |
| 10405662 | Mak10         | NM 030153     | 0.00138544 |
| 10424250 | Snrpd2        | NM 026943     | 0.00138684 |
| 10593471 | ---           | ---           | 0.00138839 |
| 10521085 | Gm9903        | ENSMUST000000 | 0.00139099 |
| 10338054 | ---           | ---           | 0.00139177 |
| 10404996 | Ninj1         | NM 013610     | 0.00139297 |
| 10560862 | 2310033E01Rik | BC139039      | 0.00139781 |
| 10401244 | Actn1         | NM 134156     | 0.00139954 |
| 10598062 | ---           | ---           | 0.00139983 |
| 10416419 | Gm10847       | ENSMUST000000 | 0.00140315 |
| 10400967 | Six1          | NM 009189     | 0.00140347 |
| 10463068 | Ptp4a1        | NM 011200     | 0.00140347 |
| 10565349 | Vmn2r66       | NM 001033878  | 0.00140434 |
| 10447564 | Zdhc14        | NM 146073     | 0.00140441 |
| 10389339 | Usp32         | NM 001029934  | 0.00140925 |
| 10387743 | Sic2a4        | NM 009204     | 0.00141069 |
| 10490731 | Sox18         | NM 009236     | 0.0014165  |
| 10365037 | Matk          | NM 010768     | 0.00141791 |
| 10377547 | Kdm6b         | NM 001017426  | 0.00141964 |
| 10341041 | ---           | ---           | 0.00142035 |
| 10453216 | Thumpd2       | BC065413      | 0.00142094 |
| 10360631 | Caccl1        | NM 023341     | 0.00142332 |
| 10569241 | H19           | NR 001592     | 0.00142562 |
| 10544499 | A930035D04Rik | AK080300      | 0.00142732 |
| 10423941 | Ttc35         | NM 025736     | 0.00142824 |
| 10452202 | Acer1         | NM 175731     | 0.00142903 |
| 10346943 | Creb1         | NM 133828     | 0.00143083 |
| 1059997  | Mtmr1         | NM 016985     | 0.00143116 |
| 10475437 | Sord          | NM 146126     | 0.00143334 |
| 10601888 | Plp1          | NM 011123     | 0.00143441 |
| 10486867 | Mfap1a        | NM 026220     | 0.00143684 |
| 10367073 | Snrpd2        | NM 026943     | 0.0014382  |
| 10545458 | Irf7          | NM 001079822  | 0.00143856 |
| 10453717 | Fabp5l2       | ENSMUST000000 | 0.00143978 |
| 10338340 | ---           | ---           | 0.00144385 |
| 10484710 | Olf73         | NM 054090     | 0.00144563 |
| 10550003 | Zfp606        | NM 026112     | 0.0014466  |
| 10511779 | Atp6v0d2      | NM 175406     | 0.0014474  |
| 10519659 | Gm3360        | XR 032742     | 0.00144793 |



|          |               |               |            |
|----------|---------------|---------------|------------|
| 10542257 | Tas2r125      | NM_207027     | 0.00144868 |
| 10445774 | B430306N03Rik | AY522648      | 0.00145023 |
| 10460359 | Coro1b        | NM_011778     | 0.00145059 |
| 10555681 | Stim1         | NM_009287     | 0.00145109 |
| 10458992 | C330018D20Rik | ENSMUST000000 | 0.00145402 |
| 10510991 | Mem1          | NM_001081100  | 0.00145546 |
| 10588538 | Iqcf1         | NM_028843     | 0.00145819 |
| 10455249 | 9630014M24Rik | ENSMUST000000 | 0.00145822 |
| 10459481 | Lman1         | NM_027400     | 0.00146231 |
| 10428018 | Ube2v2        | NM_023585     | 0.00146281 |
| 10574098 | Nlrc5         | FJ889356      | 0.00146507 |
| 10491197 | Gm1527        | NM_001033479  | 0.00146627 |
| 10340613 | ---           | ---           | 0.00146693 |
| 10462442 | Ii33          | NM_133775     | 0.00146774 |
| 10572870 | Hmgxb4        | NM_178017     | 0.00146787 |
| 10476058 | Tgm6          | NM_177726     | 0.00146813 |
| 10358459 | BC003331      | NM_145511     | 0.00146966 |
| 10408144 | V1rh9         | NM_134218     | 0.00147006 |
| 10521964 | Gm10440       | ENSMUST000000 | 0.00147165 |
| 10544608 | ---           | ---           | 0.00147206 |
| 10554789 | Ctsc          | NM_009982     | 0.00147299 |
| 10545409 | Vamp8         | NM_016794     | 0.00147353 |
| 10450957 | Cenpa         | NM_031863     | 0.00147474 |
| 10454326 | Z700062C07Rik | BC084681      | 0.00147442 |
| 10584481 | Gm8543        | XR_033953     | 0.00147474 |
| 10474984 | Nusap1        | NM_133851     | 0.00147623 |
| 10415267 | Ptpn9         | NM_008981     | 0.00148009 |
| 10563116 | Fit3l         | NM_013520     | 0.00148119 |
| 10598287 | LOC100270707  | NR_026741     | 0.00148749 |
| 10517559 | Cdc42         | NM_009861     | 0.00148848 |
| 10582466 | Sult5a1       | NM_020564     | 0.00149034 |
| 10552418 | Etfb          | NM_026695     | 0.00149148 |
| 10526459 | Rasa4         | NM_133914     | 0.00149306 |
| 10497399 | Pde7a         | NM_001122759  | 0.00149395 |
| 10510914 | B230396O12Rik | NM_172878     | 0.00149418 |
| 10514333 | 4930553M12Rik | ENSMUST000000 | 0.0014972  |
| 10417124 | B930095G15Rik | BC096543      | 0.00149848 |
| 10339750 | ---           | ---           | 0.00150107 |
| 10538115 | Gimap8        | NM_001077410  | 0.00150153 |
| 10461369 | Ahnak         | NM_009643     | 0.00150689 |
| 10575750 | Bcmo1         | NM_021486     | 0.00150797 |
| 10375903 | Cdkn2aipnl    | NM_029976     | 0.00151295 |
| 10575702 | Clec3a        | NM_001007223  | 0.00151557 |
| 10349102 | Bcl2          | NM_009741     | 0.00151646 |
| 10472846 | Pdk1          | NM_172665     | 0.00151842 |
| 10601598 | 3110007F17Rik | BC027572      | 0.00152131 |
| 10604019 | 1810037I17Rik | NM_024461     | 0.00152196 |
| 10435141 | Lmbird1       | NM_026719     | 0.00152238 |
| 10499121 | Rps3a         | NM_016959     | 0.00152401 |
| 10469250 | ---           | ---           | 0.00152443 |
| 10436239 | Z310061J03Rik | NR_027965     | 0.00152501 |
| 10581049 | Cmtm2a        | NM_027022     | 0.00152635 |
| 10395684 | Nubpl         | NM_029760     | 0.00153367 |
| 10351138 | Gm7549        | XR_031476     | 0.00153377 |
| 10438907 | Gp5           | NM_008148     | 0.00153544 |
| 10436708 | Usp16         | NM_024258     | 0.00153557 |
| 10608706 | ---           | ---           | 0.00153635 |
| 10414449 | Mudeng        | NM_144535     | 0.00153761 |
| 10419296 | Wdhd1         | NM_172598     | 0.00153769 |
| 10364262 | Irgb2         | NM_008404     | 0.00153771 |
| 10440572 | Rnf160        | NM_001081068  | 0.00153904 |
| 10607300 | Gm10437       | ENSMUST000000 | 0.00154409 |
| 10503617 | F730047E07Rik | NM_199467     | 0.00154422 |
| 10450161 | H2-Ea         | NM_010381     | 0.00154431 |
| 10398360 | ---           | ---           | 0.00154545 |
| 10495193 | Kcna2         | NM_008417     | 0.00154602 |
| 10476653 | Banf2         | NM_207275     | 0.00154604 |
| 10385391 | Cyflp2        | NM_133769     | 0.00154632 |
| 10488816 | Alcy          | NM_016661     | 0.00154813 |
| 10342777 | ---           | ---           | 0.00154836 |
| 10426507 | Arid2         | NM_175251     | 0.00154997 |
| 10549361 | Tm7sf3        | NM_026281     | 0.00155125 |
| 10520696 | Gm9924        | ENSMUST000000 | 0.00155118 |
| 10433445 | Abat          | NM_172961     | 0.00155246 |
| 10472738 | Dcaf17        | BC031546      | 0.00155564 |
| 10339358 | ---           | ---           | 0.00155652 |
| 10517328 | Tmem50a       | NM_027935     | 0.00155925 |
| 10517443 | Tceb3         | NM_013736     | 0.00156206 |
| 10543358 | Gm5301        | XM_621704     | 0.00156583 |
| 10601559 | ---           | ---           | 0.00156677 |
| 10591161 | Zfp558        | ENSMUST000000 | 0.00156825 |
| 10403394 | Gm5191        | XR_031052     | 0.00156958 |
| 10531887 | Slc10a6       | NM_029415     | 0.00157124 |
| 10562096 | Tmem147       | NM_027215     | 0.00157207 |
| 10574595 | ---           | ---           | 0.00157229 |
| 10540273 | Ube2v2        | NM_023585     | 0.00157692 |
| 10437594 | Usp7          | NM_001003918  | 0.00158027 |
| 10400630 | ---           | ---           | 0.00158113 |
| 10369748 | Gm7075        | ENSMUST000000 | 0.00158194 |
| 10379615 | Slim5         | NM_183201     | 0.00158252 |
| 10551736 | Rpp1f14a      | NM_026731     | 0.00158368 |
| 10504398 | Serf2         | NM_011354     | 0.00158683 |
| 10442493 | ---           | ---           | 0.00158773 |
| 10526838 | Got2          | NM_010325     | 0.00159114 |
| 10500876 | Lrig2         | NM_001025067  | 0.00159207 |
| 10474725 | Elf2ak4       | NM_013719     | 0.00159674 |
| 10572747 | Tpm4          | NM_001001491  | 0.00159994 |
| 10420823 | Hmbox1        | NM_177338     | 0.00160381 |
| 10597182 | Nbeal2        | BC157956      | 0.00160447 |
| 10379689 | Taf15         | NM_027427     | 0.00160718 |
| 10565381 | ---           | ---           | 0.00160759 |
| 10508382 | Ak2           | NM_016895     | 0.00161309 |
| 10583090 | Mmp10         | NM_019471     | 0.00161337 |
| 10574023 | Mt2           | NM_008630     | 0.00161994 |
| 10466423 | Cep78         | NM_198019     | 0.00162045 |
| 10372226 | Myf5          | NM_008656     | 0.00162071 |
| 10506301 | Lepr          | NM_001122899  | 0.00162193 |
| 10604620 | Fam122b       | NM_030167     | 0.00162243 |
| 10492078 | Alg5          | NM_025442     | 0.00162378 |
| 10441511 | ---           | ---           | 0.00162399 |
| 10436428 | Mina          | NM_025910     | 0.00162552 |
| 10339491 | ---           | ---           | 0.00162527 |
| 10590972 | Gm16379       | NM_001111330  | 0.00162538 |
| 10567216 | Rps15a        | NM_170669     | 0.00162756 |
| 10591739 | Acp5          | NM_001102404  | 0.00162781 |
| 10576816 | Cd209b        | NM_026972     | 0.00162909 |
| 10446693 | Wdr43         | NM_175639     | 0.00163016 |
| 10587733 | Ctsh          | NM_007801     | 0.00163114 |
| 10585444 | Ireb2         | NM_022655     | 0.00163165 |
| 10342709 | ---           | ---           | 0.00163267 |
| 10577641 | 1810011O10Rik | NM_026931     | 0.00163274 |
| 10587534 | Bckdhd        | NM_199195     | 0.00163415 |
| 10408616 | Slc22a23      | NM_001033167  | 0.00163459 |
| 10505299 | Bspry         | NM_138653     | 0.00163855 |
| 10513195 | Txn1          | NM_011660     | 0.00163909 |
| 10476880 | A530006G24Rik | XR_034866     | 0.00164168 |
| 10527441 | Arpc1b        | NM_023142     | 0.00164626 |
| 10485314 | Ttc17         | NM_183106     | 0.00164805 |

|          |               |                  |            |
|----------|---------------|------------------|------------|
| 10396141 |               | ---              | 0.0016481  |
| 10487267 | Poir2l        | NM 025593        | 0.00164827 |
| 10362904 | Rtn4lp1       | NM 130892        | 0.00164871 |
| 10558029 | Sec23lp       | NM 001029982     | 0.0016525  |
| 10357833 | Atp2b4        | NM 213616        | 0.00165292 |
| 10528972 | Ctof          | NM 031875        | 0.00165294 |
| 10596583 | Dock3         | NM 153413        | 0.00165591 |
| 10595046 | Gm3671        | XR 034893        | 0.00165643 |
| 10374983 | Ash3          | NM 023906        | 0.00165741 |
| 10372807 | Msr3          | NM 177092        | 0.00165746 |
| 10447038 | I110001A16Rik | ENSMUST000000    | 0.00166203 |
| 10397094 | Psen1         | NM 008943        | 0.00166312 |
| 10479335 | Osbpl2        | NM 144500        | 0.00166316 |
| 10563659 | Spty2d1       | NM 175318        | 0.00166362 |
| 10422280 | Abcc4         | NM 001033336     | 0.00166778 |
| 10380571 | Gngt2         | NM 023121        | 0.00166804 |
| 10501608 | Vcam1         | NM 011693        | 0.00166903 |
| 10458983 |               | 03-Mar NM 177115 | 0.00166925 |
| 10389190 | Gm11435       | NM 001045543     | 0.00167076 |
| 10516371 | Eif2c1        | NM 153403        | 0.00167317 |
| 10446376 | Man2a1        | NM 008549        | 0.00167332 |
| 10342526 | ---           | ---              | 0.00167508 |
| 10499996 | Snx27         | NM 029721        | 0.00167547 |
| 10571170 | Chrb3         | NM 173212        | 0.00167745 |
| 10352192 | Ahctf1        | NM 026375        | 0.00167798 |
| 10531987 | Gbp4          | NM 008620        | 0.00167856 |
| 10565083 | Rps17         | NM 009092        | 0.00167896 |
| 10338047 | ---           | ---              | 0.00168052 |
| 10446027 | Chaf1a        | NM 013733        | 0.00168156 |
| 10565437 | Tmem135       | NM 028343        | 0.00168352 |
| 10529226 | Rbks          | NM 153196        | 0.001684   |
| 10567355 | Gprc5b        | NM 022420        | 0.00168476 |
| 10406898 | Taf9          | NM 027592        | 0.00168839 |
| 10355176 | 4921521F21Rik | BC051128         | 0.00169226 |
| 10376324 | Gm12250       | NM 001135115     | 0.00169278 |
| 10399360 | Rhob          | NM 007483        | 0.0016929  |
| 10390748 | Tns4          | NM 172564        | 0.00169314 |
| 10368883 | Tde           | NM 011561        | 0.00169353 |
| 10378367 | Trpv3         | NM 145099        | 0.00169415 |
| 10385832 | Ii4           | NM 021283        | 0.00169466 |
| 10428619 | Enpp2         | NM 015744        | 0.00169896 |
| 10484739 | Olfrr1179     | NM 146917        | 0.0016999  |
| 10478077 | B230339M05Rik | NM 177658        | 0.00170037 |
| 10395855 | Gm5081        | NM 001037746     | 0.00170233 |
| 10483679 | Gpr155        | NM 001080707     | 0.00170411 |
| 10437399 | Coro7         | NM 030205        | 0.00170419 |
| 10492480 | Gfm1          | NM 138591        | 0.0017059  |
| 10596880 | Bsn           | NM 007567        | 0.00170639 |
| 10569200 | Poir2l        | NM 025593        | 0.0017067  |
| 10405783 | ---           | ---              | 0.00171238 |
| 10440300 | ---           | ---              | 0.00171316 |
| 10520506 | Kcnk3         | NM 010608        | 0.00171642 |
| 10411519 | Mtap1b        | NM 008634        | 0.00171717 |
| 10351966 | Olfrr414      | NM 146761        | 0.00171811 |
| 10444298 | H2-Eb1        | NM 010382        | 0.00172398 |
| 10576027 | Gm10614       | ENSMUST000000    | 0.00172889 |
| 10513824 | Cdk5rap2      | NM 145990        | 0.00172969 |
| 10405822 | Ccrk          | NM 053180        | 0.00173039 |
| 10410970 | Hnmpk         | NM 025279        | 0.00173057 |
| 10406205 | Erap1         | NM 030711        | 0.00173432 |
| 10340053 | ---           | ---              | 0.00174161 |
| 10548030 | Cd9           | NM 007657        | 0.00174381 |
| 10590648 | Top2a         | NM 011623        | 0.00174518 |
| 10358389 | Rgs2          | NM 009061        | 0.00174531 |
| 10558118 | Btdb16        | NM 001081038     | 0.00174626 |
| 10501222 | Gstm2         | NM 008183        | 0.00174692 |
| 10568417 | I110007A13Rik | BC038342         | 0.00174881 |
| 10418129 | ---           | ---              | 0.00175194 |
| 10593591 | Acat1         | NM 144784        | 0.00175291 |
| 10470893 | Set           | NM 023871        | 0.00175473 |
| 10370754 | Dos           | NM 015761        | 0.00175532 |
| 10372687 | Nup107        | NM 134010        | 0.00175941 |
| 10601539 | ---           | ---              | 0.00176012 |
| 10380087 | Mtmr4         | NM 133215        | 0.00176067 |
| 10378579 | Prpf8         | NM 138659        | 0.00176134 |
| 10476401 | Plcb1         | NM 019677        | 0.00176165 |
| 10571889 | ---           | ---              | 0.0017626  |
| 10412376 | Emb           | NM 010330        | 0.00176391 |
| 10458130 | 4933408B17Rik | NM 177773        | 0.00176598 |
| 10547704 | Hmcd2         | NM 023403        | 0.00176683 |
| 10437023 | Morc3         | NM 001045529     | 0.00177144 |
| 10497214 | Tpd52         | NM 001025261     | 0.00177261 |
| 10515737 | BC059842      | FJ998170         | 0.00177283 |
| 10340658 | ---           | ---              | 0.00177592 |
| 10475845 | Acx1          | NM 028765        | 0.00177647 |
| 10503966 | Aco1          | NM 007386        | 0.00177777 |
| 10409990 | 6720489N17Rik | BC053725         | 0.00177865 |
| 10454015 | Ttc39c        | NM 028341        | 0.00177906 |
| 10571653 | Actg1         | NM 009609        | 0.0017791  |
| 10382308 | ---           | ---              | 0.00178027 |
| 10557116 | Olfrr547      | NM 147079        | 0.00178165 |
| 10341666 | ---           | ---              | 0.0017818  |
| 10603323 | Ppp1r3f       | NM 138605        | 0.00178274 |
| 10523563 | Cds1          | NM 173370        | 0.001783   |
| 10392440 | Sic16a6       | NM 001029842     | 0.00178363 |
| 10606835 | Bex2          | NM 009749        | 0.00178553 |
| 10583905 |               | 07-Sep NM 009859 | 0.00178948 |
| 10450904 | Scoc          | NM 001039137     | 0.00179142 |
| 10541599 | Clec4b2       | NM 001004159     | 0.00179192 |
| 10388749 | Traf4         | NM 009423        | 0.00179257 |
| 10481577 | Uck1          | NM 011675        | 0.00179274 |
| 10543676 | 1700080G18Rik | ENSMUST000000    | 0.0017937  |
| 10571093 | Rnf170        | NM 029965        | 0.00179384 |
| 10392241 | Polq2         | NM 015810        | 0.0017951  |
| 10599416 | Gm10483       | ENSMUST000000    | 0.00179632 |
| 10439463 | 4930455C21Rik | NM 024273        | 0.00179633 |
| 10371907 | Nedd1         | NM 008682        | 0.00179701 |
| 10365792 | Ccdc38        | NM 175488        | 0.00179792 |
| 10591127 | Fat3          | NM 001080814     | 0.00180102 |
| 10397912 | Unc79         | NM 001081017     | 0.00180338 |
| 10512766 | Tnm14         | NM 029077        | 0.00180594 |
| 10450363 | Snerd52       | AF357375         | 0.00180677 |
| 10406108 | S430425J12Rik | ENSMUST000000    | 0.00180696 |
| 10506870 | Txndc12       | NM 025334        | 0.00180841 |
| 10580457 | N4bp1         | NM 030563        | 0.00181088 |
| 10601648 | Tnmd          | NM 022322        | 0.00181303 |
| 10584580 | ---           | ---              | 0.0018147  |
| 10513166 | Ptpn3         | NM 011207        | 0.00181709 |
| 10493516 | Gm15417       | ENSMUST000000    | 0.00181965 |
| 10467124 | Acta2         | NM 007392        | 0.00182342 |
| 10565547 | Pefr1         | NM 029078        | 0.00182356 |
| 10509992 | Hspib7        | NM 013868        | 0.00182527 |
| 10488048 | Mkks          | NM 021527        | 0.00182943 |
| 10455461 | Myot          | NM 001033621     | 0.0018299  |
| 10447483 | Nanp          | NM 026086        | 0.00183188 |
| 10563447 | Abcc6         | NM 018795        | 0.00183581 |
| 10434758 | Stgal1        | NM 145933        | 0.00183708 |
| 10352864 | ---           | ---              | 0.0018378  |

|          |               |               |            |
|----------|---------------|---------------|------------|
| 10374476 | Rps17         | NM_009092     | 0.00183938 |
| 10520467 | Hadhb         | NM_145558     | 0.00184029 |
| 10339856 |               | ---           | 0.00184084 |
| 10421046 | Dock5         | NM_177780     | 0.00184563 |
| 10458808 | Fem1c         | NM_173423     | 0.00184602 |
| 10394988 | Mapk6         | NM_015806     | 0.00184611 |
| 10453759 | Gm10554       | ENSMUST000000 | 0.00184637 |
| 10429460 | 7120482A17Rik | AK149087      | 0.00184644 |
| 10447742 | Map3k4        | NM_011948     | 0.00184842 |
| 10341502 |               | ---           | 0.00184954 |
| 10377534 | A030009H04Rik | NR_027827     | 0.00185122 |
| 10488108 | Esf1          | NM_001081090  | 0.00185129 |
| 10349378 | Dpp10         | NM_199021     | 0.00185341 |
| 10591618 | Dock6         | NM_177030     | 0.00185392 |
| 10567863 | Cd19          | NM_009844     | 0.00185407 |
| 10572776 | Ahrgap10      | NM_030113     | 0.00185509 |
| 10366956 | Stat6         | NM_009284     | 0.00185576 |
| 10573194 | Ndufb7        | NM_025843     | 0.00185757 |
| 10344278 |               | ---           | 0.00186064 |
| 10482866 | Tanc1         | NM_198294     | 0.00186172 |
| 10403453 | Dip2c         | NM_001081426  | 0.00186488 |
| 10412960 | Fam149b       | BC069846      | 0.00186647 |
| 10338442 |               | ---           | 0.00186774 |
| 10503184 | Chd7          | NM_001081417  | 0.0018736  |
| 10598839 | Rp2h          | NM_133669     | 0.00187478 |
| 10507699 | Scmh1         | NM_013883     | 0.00187517 |
| 10555401 |               | ---           | 0.00187975 |
| 10545623 | Dok1          | NM_010070     | 0.00188069 |
| 10606730 | Armcx6        | NM_001007578  | 0.00188101 |
| 10567442 | Dnahc3        | XM_355934     | 0.00188499 |
| 10566846 | Dennd5a       | NM_021494     | 0.00188536 |
| 10408810 |               | ---           | 0.00188568 |
| 10555055 | Ndufc2        | NM_024220     | 0.00188692 |
| 10596575 | Manf          | NM_029103     | 0.00189162 |
| 10510882 | Megf6         | NM_001162977  | 0.00189269 |
| 10387699 | Centb1        | NM_153788     | 0.00189361 |
| 10600892 | Pgr15l        | NM_001033361  | 0.00189505 |
| 10402460 | 4831426119Rik | NM_001042699  | 0.00189788 |
| 10528120 | Dmtf1         | NM_011806     | 0.00190241 |
| 10526261 | Stx1a         | NM_016801     | 0.00190668 |
| 10407598 | Ryr2          | NM_023868     | 0.00190813 |
| 10345077 | Khdc1a        | NM_183322     | 0.00191103 |
| 10411126 | Jmy           | NM_021310     | 0.00191296 |
| 10411711 | Cdk7          | NM_009874     | 0.00191378 |
| 10553413 | Prmt3         | NM_133740     | 0.00191525 |
| 10608645 |               | ---           | 0.00192032 |
| 10480477 | Pax8          | NM_011040     | 0.00192341 |
| 10499062 | Rhd1          | NM_001033301  | 0.00192703 |
| 10412773 | Slc4a7        | NM_001033270  | 0.00192998 |
| 10506883 | Rab3b         | NM_023537     | 0.00193    |
| 10584374 | Olfir888      | NM_146424     | 0.00193027 |
| 10549162 | Sts1a1        | NM_011374     | 0.00193208 |
| 10400609 | Mdga2         | NM_207010     | 0.00193431 |
| 10563149 | Ccdc155       | NM_201374     | 0.00193584 |
| 10556491 | Far1          | NM_026143     | 0.00193768 |
| 10380558 |               | ---           | 0.00193812 |
| 10342010 |               | ---           | 0.00193841 |
| 10502774 | Lphn2         | NM_001081298  | 0.00193968 |
| 10342160 |               | ---           | 0.00194173 |
| 10442231 |               | ---           | 0.00194235 |
| 10468413 | D19Ert652e    | BC107403      | 0.00194432 |
| 10587778 |               | ---           | 0.00195411 |
| 10341351 |               | ---           | 0.00195532 |
| 10566201 | Olfir589      | NM_147052     | 0.00195812 |
| 10402444 | Dicer1        | NM_148948     | 0.00196153 |
| 10355024 | Ica1l         | NM_027407     | 0.00196253 |
| 10557754 | Orai3         | NM_198424     | 0.0019627  |
| 10473650 | Nup160        | NM_021512     | 0.00196288 |
| 10394749 | Rhd10         | NM_001008421  | 0.00196416 |
| 10407782 | Edaradd       | NM_133643     | 0.00196987 |
| 10459837 | 8030462N17Rik | BC120889      | 0.00197043 |
| 10544732 | Skap2         | NM_018773     | 0.00197252 |
| 10480459 | Hnmt          | NM_080462     | 0.00197322 |
| 10344023 |               | ---           | 0.00197477 |
| 10536334 | Dync1i1       | NM_010063     | 0.00197797 |
| 10421100 | Nefm          | NM_008691     | 0.00197811 |
| 10580807 | Kifc3         | NM_010631     | 0.00197914 |
| 10338002 |               | ---           | 0.00197926 |
| 10421877 | Diap3         | NM_019670     | 0.00198125 |
| 10405147 |               | ---           | 0.00198204 |
| 10526514 | Cldn15        | NM_021719     | 0.00198369 |
| 10565589 | Hmqb1         | NM_010439     | 0.00198555 |
| 10400052 | 4930579E17Rik | NM_178629     | 0.00198757 |
| 10386582 | Top3a         | NM_009410     | 0.00198851 |
| 10598004 | Ccr1          | NM_009912     | 0.00198978 |
| 10416215 | Loxl2         | NM_033325     | 0.00199119 |
| 10408741 | Txndc5        | NM_145367     | 0.00199439 |
| 10518228 | Vps13d        | NM_001128198  | 0.00199475 |
| 10574682 | E2f4          | NM_148952     | 0.00200371 |
| 10390895 | Krtap3-1      | ENSMUST000000 | 0.00200502 |
| 10600453 | Rtkk9         | NM_001161421  | 0.00200858 |
| 10415413 | BC030046      | BC151043      | 0.00201059 |
| 10413280 |               | ---           | 0.00201157 |
| 10539080 | St3gal5       | NM_011375     | 0.0020174  |
| 10604248 | Thoc2         | NM_001033422  | 0.00201871 |
| 10389421 | Ints2         | NM_027421     | 0.00201987 |
| 10588479 | Tlr9          | NM_031178     | 0.00202002 |
| 10562927 | Ptov1         | NM_133949     | 0.00202014 |
| 10404049 | Hist1h3g      | NM_145073     | 0.0020236  |
| 10560043 | Zfp329        | NM_026046     | 0.00202575 |
| 10440570 | Rnf160        | NM_001081068  | 0.00203056 |
| 10340568 |               | ---           | 0.00203134 |
| 10395594 |               | ---           | 0.0020338  |
| 10522051 | Kif3          | NM_008453     | 0.00203592 |
| 10460177 | Mt15          | NM_001039657  | 0.00203629 |
| 10571680 | Mif1ip        | NM_027973     | 0.00203948 |
| 10503709 | D130062J21Rik | AK051661      | 0.00204156 |
| 10406817 | Enc1          | NM_007930     | 0.00204276 |
| 10404521 | Bph1          | NM_026512     | 0.00204588 |
| 10489784 | Prex1         | NM_177782     | 0.00204975 |
| 10356510 | Irfca         | ENSMUST000000 | 0.00205023 |
| 10442542 | Nthk1         | NM_008743     | 0.00205283 |
| 10359648 | Scyl3         | NM_028776     | 0.00205291 |
| 10579825 | Pou4f2        | NM_138944     | 0.00206225 |
| 10534202 | Ncf1          | NM_010876     | 0.00206332 |
| 10394682 | LOC633944     | XR_032386     | 0.00206477 |
| 10377982 | Kif1c         | NM_153103     | 0.00206597 |
| 10459075 | Myoz3         | NM_133363     | 0.00206917 |
| 10496169 | Ppa2          | NM_146141     | 0.00206965 |
| 10455942 | A730017C20Rik | BC075669      | 0.00207213 |
| 10355266 | Lanc1l        | NM_021295     | 0.0020744  |
| 10606439 |               | ---           | 0.00207535 |
| 10553450 | Nell1         | NM_001037906  | 0.00207603 |
| 10549420 | Tmtc1         | NM_198967     | 0.00207636 |
| 10372099 |               | ---           | 0.00208123 |
| 10577144 | Dcun1d2       | NM_001024504  | 0.00208153 |
| 10409978 | Gm7036        | NM_001039239  | 0.00208656 |
| 10540298 | Ch1           | NM_007697     | 0.00208751 |

|          |               |               |            |
|----------|---------------|---------------|------------|
| 10498871 | Tmem144       | NM_027495     | 0.00208847 |
| 10339713 |               | ---           | 0.00209029 |
| 10543065 |               | ---           | 0.00209609 |
| 10466935 | Rln1          | NM_011272     | 0.00209741 |
| 10547088 | Mbd4          | NM_010774     | 0.00210009 |
| 10502823 | Dnaib4        | NM_025926     | 0.00210116 |
| 10421723 | Dnalc15       | NM_025384     | 0.00210127 |
| 10428074 | Rpl30         | NM_009083     | 0.00210131 |
| 10568150 | Kif22         | NM_145588     | 0.00210213 |
| 10399461 | Gm4929        | XR_031578     | 0.00210309 |
| 10545502 | Dnahc6        | ENSMUST000000 | 0.00210555 |
| 10457040 | Zfp516        | NM_183033     | 0.00210664 |
| 10591884 | Glb1l2        | NM_153803     | 0.00210691 |
| 10427918 | Fam105a       | BC052328      | 0.00211519 |
| 10343560 |               | ---           | 0.00211985 |
| 10469720 | Slc1a1        | NM_009199     | 0.00212129 |
| 10412711 | Ucgb          | NM_026219     | 0.00212473 |
| 10421624 | Cog3          | NM_177381     | 0.00212601 |
| 10458090 | Reep5         | NM_007874     | 0.00212601 |
| 10339874 |               | ---           | 0.00212614 |
| 10375245 | Gabbr2        | NM_008070     | 0.00213035 |
| 10374746 | Fanc1         | NM_025923     | 0.00213061 |
| 10500103 | Gabpb2        | NM_029885     | 0.00213135 |
| 10512291 | Dctn3         | NM_016890     | 0.00213174 |
| 10605884 | Ophn1         | NM_052976     | 0.00213271 |
| 10342064 |               | ---           | 0.00213793 |
| 10603247 |               | ---           | 0.00214298 |
| 10439932 |               | ---           | 0.00214547 |
| 10397818 | Cpsf2         | NM_016856     | 0.00214658 |
| 10519211 | Tas1r3        | NM_031872     | 0.00214668 |
| 10340343 |               | ---           | 0.00214727 |
| 10338774 |               | ---           | 0.00214863 |
| 10465804 | Poir2q        | NM_026329     | 0.00214967 |
| 10362811 | Sesn1         | NM_001013370  | 0.00215032 |
| 10385599 | Canx          | NM_007597     | 0.00215222 |
| 10341934 |               | ---           | 0.00215593 |
| 10339360 |               | ---           | 0.00215801 |
| 10578902 |               | ---           | 0.00215931 |
| 10352292 | G370120E05Rik | ENSMUST000000 | 0.00216397 |
| 10354788 |               | ---           | 0.00216677 |
| 10408629 | I300014I06Rik | NM_025831     | 0.00216767 |
| 10507347 | Tesk2         | NM_146151     | 0.00216872 |
| 10497663 | Slc7a14       | NM_172861     | 0.00217116 |
| 10437817 | Pdxdc1        | NM_053181     | 0.00217285 |
| 10434643 | Psmb3         | NM_011971     | 0.00217326 |
| 10582337 | Fam38a        | ENSMUST000000 | 0.00217529 |
| 10419999 | Jph4          | NM_177049     | 0.00217529 |
| 10406795 | Gfm2          | NM_177266     | 0.00217531 |
| 10593605 | Cul5          | NM_027807     | 0.00217549 |
| 10358551 | Hmcn1         | NM_001024720  | 0.00217752 |
| 10514296 | Ifna9         | NM_010507     | 0.00217782 |
| 10468016 | Ndufb8        | NM_026061     | 0.00217899 |
| 10433433 | BC024814      | BC024814      | 0.00218051 |
| 10490826 | Zbtb10        | NM_177660     | 0.00218295 |
| 10468533 | Gpam          | NM_008149     | 0.00218518 |
| 10388869 | Tnfr1         | NM_009395     | 0.00218634 |
| 10431935 | Amigo2        | NM_178114     | 0.00218652 |
| 10338645 |               | ---           | 0.00218657 |
| 10484207 | 2610301F02Rik | NM_001025576  | 0.00218957 |
| 10601235 | Ogt           | NM_139144     | 0.00219118 |
| 10574765 | Lrrc36        | NM_001033371  | 0.00219372 |
| 10576829 | Cd209c        | NM_130903     | 0.00219481 |
| 10544150 | Jhdm1d        | NM_001033430  | 0.00219552 |
| 10503989 | 2010003O02Rik | ENSMUST000000 | 0.00219649 |
| 10430745 | Chadl         | ENSMUST000000 | 0.00220096 |
| 10576971 | Irs2          | NM_001081212  | 0.00220199 |
| 10603627 | Bcor          | NM_175045     | 0.00220327 |
| 10345091 | B3gat2        | NM_172124     | 0.00220383 |
| 10494407 | Hist2h2bb     | NM_175666     | 0.00220533 |
| 10423017 |               | ---           | 0.00221017 |
| 10376383 | Gm12253       | NM_001045542  | 0.00221935 |
| 10496580 | Gbp3          | NM_018734     | 0.00222069 |
| 10603440 | Was           | NM_009515     | 0.00222098 |
| 10600733 | Gm5072        | NM_001114678  | 0.00222112 |
| 10494390 | Hist2h2aa1    | NM_013549     | 0.00222374 |
| 10598055 | ND3           | ENSMUST000000 | 0.00222453 |
| 10407709 | Mtr           | NM_001081128  | 0.00222963 |
| 10468489 | Xpnp1         | NM_133216     | 0.00223354 |
| 10576439 | Cog2          | NM_029746     | 0.00223447 |
| 10548931 | Slc15a5       | NM_177787     | 0.00223737 |
| 10391013 | Krt13         | NM_010662     | 0.00223829 |
| 10577395 | 6820431F20Rik | BC058969      | 0.00223853 |
| 10432820 | Krt72         | NM_213728     | 0.00223913 |
| 10537026 | Cpa4          | NM_027926     | 0.00224108 |
| 10528723 | Mil3          | NM_001081383  | 0.00224228 |
| 10426180 | Saps2         | NM_026813     | 0.00224299 |
| 10338048 |               | ---           | 0.00224738 |
| 10353167 | Tram1         | NM_028173     | 0.00225155 |
| 10596982 | Ccdc72        | NM_183250     | 0.00225285 |
| 10485655 | Mlagohb       | NM_025564     | 0.00225313 |
| 10545346 | Ptcd3         | NM_027275     | 0.00225392 |
| 10339247 |               | ---           | 0.00225754 |
| 10540059 | Slc41a3       | NM_027868     | 0.00225808 |
| 10517924 | Cicnkb        | NM_019701     | 0.00225944 |
| 10461844 | Gnaq          | NM_008139     | 0.00226186 |
| 10467859 | Cox15         | NM_144874     | 0.00226513 |
| 10521222 | Add1          | NM_001102444  | 0.00226567 |
| 10408130 | V1rh15        | ENSMUST000000 | 0.00226988 |
| 10465411 | Slc22a12      | NM_009203     | 0.00227048 |
| 10399677 | Cox7a2l       | NM_001159529  | 0.00227544 |
| 10478145 | Ppp1r16b      | NM_153089     | 0.00227733 |
| 10595466 | Pgm3          | NM_028352     | 0.00228063 |
| 10376283 |               | ---           | 0.00229074 |
| 10462822 | Exoc6         | NM_175353     | 0.00229162 |
| 10499514 | Trim46        | NM_183037     | 0.00229201 |
| 10389507 | Tmem49        | NM_029478     | 0.00229359 |
| 10354868 | Fam126b       | NM_172513     | 0.00229805 |
| 10344270 |               | ---           | 0.00229871 |
| 10413419 | Arhgef3       | NM_027871     | 0.00230294 |
| 10434418 | Vwa5b2        | NM_182636     | 0.00230513 |
| 10449163 | Piga          | NM_011822     | 0.00230561 |
| 10535750 | Ntrf3         | NM_029581     | 0.00230584 |
| 10368647 | Dse           | NM_172508     | 0.00230689 |
| 10570483 | Arhgef10      | NM_172751     | 0.00230775 |
| 10494395 | Hist2h2aa1    | NM_013549     | 0.00231047 |
| 10343488 |               | ---           | 0.00231369 |
| 10483131 | Kcnh7         | NM_133207     | 0.00231533 |
| 10603328 | Ccdc22        | NM_138603     | 0.00232041 |
| 10516566 | C77080        | NM_001033189  | 0.00232193 |
| 10489127 | Rbl1          | NM_011249     | 0.00232244 |
| 10490872 | Lrrcc1        | NM_028915     | 0.00232747 |
| 10382228 | Axin2         | NM_015732     | 0.00232818 |
| 10500582 | Wdr3          | NM_175552     | 0.00233065 |
| 10503305 | 1110037F02Rik | BC028830      | 0.00233126 |
| 10545588 | Hk2           | NM_013820     | 0.00233219 |
| 10360506 | Akt3          | NM_011785     | 0.00233634 |
| 10558903 | Taldo1        | NM_011528     | 0.00233778 |
| 10496302 | Manba         | NM_027288     | 0.00234303 |

|          |               |               |            |
|----------|---------------|---------------|------------|
| 10511881 | Manea         | NM_172865     | 0.00234617 |
| 10561178 | Rab4b         | NM_029391     | 0.00234806 |
| 10593953 | Lman1l        | NM_199222     | 0.00234827 |
| 10338347 |               | ---           | 0.00234898 |
| 10349562 | AA986860      | NM_177604     | 0.00235082 |
| 10598049 | ND3           | ENSMUST000000 | 0.00235591 |
| 10436304 | Abi3bp        | NM_001014423  | 0.00235816 |
| 10373826 | Gal3st1       | NM_016922     | 0.00235922 |
| 10441231 | Bace2         | NM_019517     | 0.00236066 |
| 10493565 | Adar          | NM_001038587  | 0.00236099 |
| 10445894 | Erh           | NM_007951     | 0.00236123 |
| 10449979 | Morc2b        | NM_177719     | 0.00236291 |
| 10465303 | Slc22a20      | NM_198650     | 0.00236818 |
| 10393058 | H3f3b         | NM_008211     | 0.00237032 |
| 10569311 | Gm5054        | XR_034827     | 0.0023721  |
| 10492890 | Lrba          | NM_030695     | 0.00237242 |
| 10540650 | Arpc4         | NM_026592     | 0.00237368 |
| 10530096 |               | ---           | 0.00237394 |
| 10532905 | 4930519G04Rik | NM_026263     | 0.00237635 |
| 10341749 |               | ---           | 0.00237669 |
| 10597978 | Fyco1         | NM_148925     | 0.0023797  |
| 10343735 |               | ---           | 0.00238053 |
| 10445688 | Ccnd3         | NM_001081636  | 0.00238157 |
| 10506743 | 0610037L13Rik | BC019215      | 0.00238266 |
| 10463695 | 2010012005Rik | BC027506      | 0.00238347 |
| 10408202 | Hist1h3f      | NM_013548     | 0.00238393 |
| 10598057 |               | ---           | 0.00237943 |
| 10557308 | Hs3st4        | ENSMUST000000 | 0.00239943 |
| 10597758 | Csmp1         | NM_153287     | 0.00239984 |
| 10366517 | Kcnmb4        | NM_021452     | 0.00240078 |
| 10537817 | Olfra441      | NM_146655     | 0.00240212 |
| 10587688 |               | ---           | 0.00240357 |
| 10595620 |               | ---           | 0.00240357 |
| 10487787 | Gfra4         | NM_020014     | 0.00240393 |
| 10363195 | Hsf2          | NM_008297     | 0.00240635 |
| 10512915 | 2810432L12Rik | NM_025944     | 0.00241037 |
| 10451953 | Lrg1          | NM_029796     | 0.00241255 |
| 10579731 | Med26         | NM_027485     | 0.0024132  |
| 10503464 | Cnqb3         | NM_013927     | 0.00241483 |
| 10533246 | Oas1q         | NM_011852     | 0.00241778 |
| 10517646 | Pla2q2f       | NM_012045     | 0.00241836 |
| 10567446 | Dnahc3        | BC051401      | 0.00242001 |
| 10514561 | E130114P18Rik | ENSMUST000000 | 0.00242101 |
| 10482123 | Olfra351      | NM_146942     | 0.00242178 |
| 10340767 |               | ---           | 0.00243004 |
| 10420426 | F630043A04Rik | NM_198605     | 0.00243041 |
| 10385447 | Dppa1         | NM_178247     | 0.00243307 |
| 10604564 | Gpc4          | NM_008150     | 0.00243649 |
| 10346564 | Casp8         | NM_009812     | 0.00243862 |
| 10569291 | Krtap5-2      | NM_027844     | 0.00244224 |
| 10553833 | Ndn           | NM_010882     | 0.0024427  |
| 10593671 | Dmxl2         | NM_172771     | 0.0024432  |
| 10430993 | 1700001L05Rik | ENSMUST000000 | 0.00244363 |
| 10487380 | Gm10766       | ENSMUST000000 | 0.00245148 |
| 10445458 | Xpo5          | NM_028198     | 0.00245233 |
| 10449672 | Tmprss3       | NM_080727     | 0.00245544 |
| 10534990 | Taf6          | NM_009315     | 0.00245705 |
| 10342664 |               | ---           | 0.00245813 |
| 10583163 | Tirpc6        | NM_012838     | 0.00244499 |
| 10418455 | Ith1          | NM_008406     | 0.00246502 |
| 10438445 | Kilhl6        | NM_183390     | 0.00246614 |
| 10338403 |               | ---           | 0.00246878 |
| 10355532 | Tns1          | NM_027884     | 0.00246965 |
| 10357242 | Dbi           | NM_001037999  | 0.00246974 |
| 10408083 | Hist1h3g      | NM_145073     | 0.00247058 |
| 10554569 | Fam103a1      | BC096399      | 0.00247467 |
| 10344044 |               | ---           | 0.0024752  |
| 10378126 | Ankfy1        | NM_009671     | 0.00247793 |
| 10451077 |               | ---           | 0.00248157 |
| 10449207 | Rab11fip3     | NM_001162869  | 0.00248541 |
| 10489355 | Jph2          | ENSMUST000000 | 0.00248869 |
| 10430748 | Rangap1       | NM_011241     | 0.00249183 |
| 10338028 |               | ---           | 0.00249559 |
| 10413174 | Rps24         | NM_011297     | 0.00249716 |
| 10439218 | Pdia5         | NM_028295     | 0.00249938 |
| 10540639 | Ogg1          | NM_010957     | 0.00250056 |
| 10439780 | 6430553K19Rik | ENSMUST000000 | 0.00250095 |
| 10462603 | Fas           | NM_007987     | 0.00250202 |
| 10498620 | Trim59        | NM_025863     | 0.00250205 |
| 10406905 | Ccdc125       | NM_183115     | 0.00250361 |
| 10340605 |               | ---           | 0.00250369 |
| 10416437 | Lcp1          | NM_008879     | 0.00250387 |
| 10408613 | Tubb2b        | NM_023716     | 0.00250479 |
| 10434446 | Ece2          | NM_139293     | 0.00250742 |
| 10362350 | Themis        | NM_178666     | 0.00250925 |
| 10568225 | Zfp768        | NM_146202     | 0.00251282 |
| 10364728 | Mum1          | NM_023431     | 0.00251288 |
| 10406067 | Ciptm1l       | NM_146047     | 0.00251332 |
| 10468513 | 1700001K23Rik | ENSMUST000000 | 0.00251426 |
| 10447294 | Prkce         | NM_011104     | 0.00251487 |
| 10444258 | Psmb8         | NM_010724     | 0.0025217  |
| 10399924 | Pik3cg        | NM_020272     | 0.0025221  |
| 10549375 | Rps26         | NM_013765     | 0.00252213 |
| 10400479 | Nkx2-9        | NM_008701     | 0.00252412 |
| 10384737 | Papalg        | NM_172555     | 0.00252428 |
| 10490838 | Fabp5         | NM_010634     | 0.00252673 |
| 10374485 | Peli1         | NM_023324     | 0.00253128 |
| 10595626 |               | ---           | 0.00253271 |
| 10484425 | 2700094K13Rik | NM_001033166  | 0.0025332  |
| 10464642 | Atpgd1        | BC023699      | 0.00253374 |
| 10459329 | 2700046A07Rik | ENSMUST000000 | 0.00253504 |
| 10393591 |               | ---           | 0.00253642 |
| 10442719 | Ccdc154       | ENSMUST000000 | 0.00254167 |
| 10460591 | Fibp          | NM_021438     | 0.00254186 |
| 10444788 | H2-Q1         | NM_010390     | 0.00254584 |
| 10455531 | 1700018A14Rik | NM_001145259  | 0.00254701 |
| 10396712 | Fut8          | NM_016893     | 0.00255039 |
| 10499963 | Tdpoz1        | NM_148949     | 0.00255157 |
| 10557177 | Prkcb         | NM_008855     | 0.00255288 |
| 10492195 | Tsc2d2        | NM_001081229  | 0.002553   |
| 10411078 | Spz1          | NM_030237     | 0.00255363 |
| 10589940 | Osbpl10       | NM_148958     | 0.0025538  |
| 10546349 | Xpc           | NM_009531     | 0.00255387 |
| 10381474 | Arl4d         | NM_025404     | 0.00255915 |
| 10340059 |               | ---           | 0.0025623  |
| 10546180 | Gm839         | BC147090      | 0.00256291 |
| 10588035 | Gm8560        | XR_031229     | 0.00256677 |
| 10338065 |               | ---           | 0.00256774 |
| 10442258 | 4930432O21Rik | NM_001025373  | 0.00256995 |
| 10531583 | 1700010H22Rik | ENSMUST000000 | 0.00257134 |
| 10459066 | LOC100044195  | BC150900      | 0.00257213 |
| 10426767 | Aqp5          | NM_009701     | 0.00257508 |
| 10599342 | 6030498E09Rik | NM_183126     | 0.00257588 |
| 10593219 | Nnmt          | NM_010924     | 0.00257617 |
| 10503410 | Tmem64        | NM_181401     | 0.00258408 |
| 10475427 | 4933406J08Rik | NM_028914     | 0.00258631 |
| 10481135 | Surf1         | NM_013677     | 0.00259763 |
| 10606714 | Gla           | NM_013463     | 0.00260136 |

|          |               |               |            |
|----------|---------------|---------------|------------|
| 10599776 | Brs3          | NM_009766     | 0.00260678 |
| 10570556 | Mcp1          | NM_173189     | 0.00260724 |
| 10371082 | Itgb1bp3      | NM_027120     | 0.00260934 |
| 10339654 |               | ---           | 0.00261091 |
| 10419261 | Bmp4          | NM_007554     | 0.00261286 |
| 10454093 | Hmiz2         | NM_053161     | 0.00261436 |
| 10420497 | Gm6907        | EU155106      | 0.00261559 |
| 10432439 | Fmnl3         | NM_011711     | 0.00262151 |
| 10424404 | Pvt1          | NR_003368     | 0.00262362 |
| 10437885 | Myh11         | NM_013607     | 0.00263449 |
| 10434577 | Vps8          | NM_001081366  | 0.00263583 |
| 10412207 | Gpx8          | NM_027127     | 0.00263752 |
| 10576532 | Tsnax         | NM_016909     | 0.00264419 |
| 10341908 |               | ---           | 0.00264492 |
| 10443095 | Syngap1       | ENSMUST000000 | 0.00264674 |
| 10344895 | Gm7560        | XR_032183     | 0.00264858 |
| 10517677 | Nbl1          | NM_008675     | 0.00264867 |
| 10374793 | Pnpt1         | NM_027869     | 0.00264979 |
| 10466841 |               | ---           | 0.00266627 |
| 10453178 | Map4k3        | NM_001081357  | 0.00266651 |
| 10472469 | 4932414N04Rik | NM_183113     | 0.00266831 |
| 10514338 |               | ---           | 0.00267369 |
| 10374929 | 4931440F15Rik | BC139107      | 0.00267663 |
| 10469167 | Sfmbt2        | NM_177386     | 0.00267695 |
| 10341587 |               | ---           | 0.00268254 |
| 10450694 | H2-T22        | NM_010397     | 0.00268341 |
| 10454240 | Isg20         | NM_020583     | 0.00268483 |
| 10599498 | Utp14a        | NM_028276     | 0.00268515 |
| 10586184 | Tjpin         | NM_025372     | 0.00269079 |
| 10500990 | Atp5f1        | NM_009725     | 0.00269103 |
| 10546960 |               | ---           | 0.00269468 |
| 10496338 | Ppp3ca        | NM_008913     | 0.00269707 |
| 10422598 | Sepp1         | NM_009155     | 0.00269789 |
| 10539669 | Add2          | NM_013458     | 0.00270026 |
| 10593490 | Gm6981        | NR_023357     | 0.00270047 |
| 10556082 | Ppfbp2        | NM_008905     | 0.00270257 |
| 10504646 |               | ---           | 0.00270643 |
| 10353947 | Tmem131       | NM_018872     | 0.00270715 |
| 10339238 |               | ---           | 0.00270787 |
| 10397351 | Jdp2          | NM_030887     | 0.00270941 |
| 10340927 |               | ---           | 0.00271364 |
| 10574694 | Elmo3         | NM_172760     | 0.00271372 |
| 10388884 | Nlk           | NM_008702     | 0.00271374 |
| 10339504 |               | ---           | 0.00271799 |
| 10344010 |               | ---           | 0.00271803 |
| 10370007 | Gstt4         | NM_029472     | 0.00272352 |
| 10494170 | Lysmd1        | NM_153121     | 0.00272501 |
| 10427492 | Gm10050       | ENSMUST000000 | 0.00272538 |
| 10528951 | Gpr113        | NM_001014394  | 0.00272855 |
| 10338136 |               | ---           | 0.0027293  |
| 10402266 |               | ---           | 0.00273046 |
| 10544702 | Gm5301        | XM_621704     | 0.00273205 |
| 10397752 | Calm1         | NM_009790     | 0.00273218 |
| 10540241 | Arl6ip5       | NM_022992     | 0.00273269 |
| 10376868 | Trpv2         | NM_011706     | 0.00273328 |
| 10506594 | Acot11        | NM_025590     | 0.0027387  |
| 10369388 | Unc5b         | NM_029770     | 0.0027391  |
| 10528921 | Sncg          | NM_011430     | 0.00273911 |
| 10538503 | Ccdc129       | NM_001081665  | 0.00273985 |
| 10519655 | Gm8912        | XR_002114     | 0.00274091 |
| 10491945 | Rab33b        | NM_016858     | 0.00274117 |
| 10514466 | Jun           | NM_010591     | 0.00274206 |
| 10414720 |               | ---           | 0.00274653 |
| 10414917 |               | ---           | 0.00274653 |
| 10531201 | Adamts3       | NM_001081401  | 0.00274681 |
| 10440028 | 2310005G13Rik | NM_183281     | 0.00274847 |
| 10466669 | Gda           | NM_010266     | 0.00274865 |
| 10338325 |               | ---           | 0.00274895 |
| 10561085 | Hnmpul1       | NM_144922     | 0.00274944 |
| 10513943 | Rasef         | ENSMUST000000 | 0.00275141 |
| 10378523 | Smg6          | NM_001002764  | 0.00275587 |
| 10581073 | Dync1li2      | NM_001013380  | 0.0027576  |
| 10362102 | Gm10825       | ENSMUST000000 | 0.00275863 |
| 10385155 | Fbll1         | NM_001004147  | 0.00276272 |
| 10373912 | Osm           | NM_001013365  | 0.0027628  |
| 10489261 | Emilin3       | NM_182840     | 0.002764   |
| 10572596 | 5430437P03Rik | BC005692      | 0.00276405 |
| 10372082 | Nudt4         | NM_027722     | 0.00276655 |
| 10525885 | Ubc           | BC025894      | 0.00276714 |
| 10376803 | Fam83g        | NM_178618     | 0.00276895 |
| 10457929 | Rit2          | NM_009065     | 0.00277017 |
| 10410134 | Gm7712        | XR_033575     | 0.00277068 |
| 10429407 |               | ---           | 0.00277105 |
| 10366344 | Gm5176        | BC054110      | 0.00277134 |
| 10565072 | Sec11a        | NM_019951     | 0.00277418 |
| 10389719 | Scpep1        | NM_029023     | 0.00277639 |
| 10485955 | Scg5          | NM_009162     | 0.00277689 |
| 10351843 | Vsiq8         | NM_177723     | 0.00278107 |
| 10387651 | 4933402P03Rik | BC137961      | 0.00279096 |
| 10420390 | Xpo4          | NM_020506     | 0.00279151 |
| 10582922 |               | ---           | 0.00279575 |
| 10397148 | Acot1         | NM_012006     | 0.00279629 |
| 10584162 | Tmed2         | NM_019770     | 0.00279668 |
| 10338823 |               | ---           | 0.00279792 |
| 10355836 | Resp18        | NM_009049     | 0.00279993 |
| 10342437 |               | ---           | 0.00280083 |
| 10488785 | E2f1          | NM_007891     | 0.00280603 |
| 10358648 | Hmcn1         | NM_001024720  | 0.00280626 |
| 10596277 | Dnajc13       | NM_001163026  | 0.00280628 |
| 10421709 | Gm6994        | NM_001037935  | 0.00280809 |
| 10463630 |               | ---           | 0.00281182 |
| 10379153 | Aldoc         | NM_009657     | 0.00281568 |
| 10489422 | Kcns1         | NM_008435     | 0.00281579 |
| 10440977 | Atp5o         | NM_138597     | 0.00281778 |
| 10514926 | B230314M03Rik | ENSMUST000000 | 0.00281792 |
| 10531415 | Cxcl10        | NM_021274     | 0.00282012 |
| 10416099 | Adra1a        | NM_013461     | 0.00282029 |
| 10353450 | Gm4956        | NR_002858     | 0.0028203  |
| 10576328 | Mc1r          | NM_008559     | 0.00282281 |
| 10422259 | Tgds          | NM_029578     | 0.00282343 |
| 10521415 | Abllm2        | NM_177678     | 0.00282346 |
| 10340591 |               | ---           | 0.00282582 |
| 10356999 | Prdx2         | NM_011563     | 0.00282683 |
| 10519105 | Ski           | NM_011385     | 0.00282842 |
| 10473576 | Olfrl1152     | NM_001011834  | 0.00282925 |
| 10384577 |               | ---           | 0.00283029 |
| 10484811 | Olfrl1232     | NM_146323     | 0.00283186 |
| 10431637 | Cpne8         | NM_025815     | 0.00283315 |
| 10403941 | Hist1h3g      | NM_145073     | 0.00283737 |
| 10383993 | Ccdc117       | NM_134033     | 0.00283904 |
| 10472930 | Sp9           | NM_001005343  | 0.00284232 |
| 10343067 |               | ---           | 0.00284297 |
| 10416940 | Tpm3          | ENSMUST000000 | 0.00284983 |
| 10412443 | Cts3          | NM_026906     | 0.0028507  |
| 10409955 | Cts3          | NM_026906     | 0.00285074 |
| 10552752 | Akt1s1        | NM_026270     | 0.00285314 |
| 10554419 | Vps33b        | NM_178070     | 0.00285391 |
| 10557148 | Dctn5         | NM_021608     | 0.00285447 |

|          |               |              |            |
|----------|---------------|--------------|------------|
| 10529711 | Clnk          | NM 013748    | 0.00286007 |
| 10344165 |               | ---          | 0.00286325 |
| 10538842 | Gng12         | NM 025278    | 0.00286383 |
| 10594277 | Paqr5         | NM 028748    | 0.00286519 |
| 10598178 | Disp1         | NM 026866    | 0.00286572 |
| 10381870 | Gm10842       | ENSMUST00000 | 0.00286641 |
| 10449971 | Zfp763        | NM 028543    | 0.00286826 |
| 10534102 | Gusb          | NM 010368    | 0.00287112 |
| 10395910 | Pnn           | NM 008891    | 0.00287135 |
| 10476941 |               | ---          | 0.00287256 |
| 10494405 | Hist2h3b      | NM 178215    | 0.00287626 |
| 10405211 | Gadd45g       | NM 011817    | 0.00287819 |
| 10445434 | Mrps18a       | NM 026768    | 0.0028813  |
| 10544932 | Inmt          | NM 009349    | 0.0028833  |
| 10580986 | Rbmxrt        | NM 009033    | 0.00288538 |
| 10571310 | Rpl29         | NM 009082    | 0.00288891 |
| 10587554 | Tpbq          | NM 011627    | 0.00289337 |
| 10576854 | Cbx1          | NM 183315    | 0.00289402 |
| 10559486 | Lair1         | NM 001113474 | 0.00289749 |
| 10581813 | Mkl           | NM 029005    | 0.00289997 |
| 10343049 |               | ---          | 0.00290065 |
| 10527646 | BC028471      | ENSMUST00000 | 0.00290607 |
| 10492091 | Smad9         | NM 019483    | 0.0029077  |
| 10515220 | Faah          | NM 010173    | 0.00290987 |
| 10343669 |               | ---          | 0.00290989 |
| 10594490 | Sic24a1       | NM 144813    | 0.00291524 |
| 10338845 |               | ---          | 0.00291735 |
| 10593634 | Elmod1        | NM 177769    | 0.00292181 |
| 10529758 | Bod1l         | NM 001081422 | 0.00292486 |
| 10547758 | Emg1          | NM 013536    | 0.0029249  |
| 10601595 | 3110007F17Rik | BC027572     | 0.00293245 |
| 10354504 | Gm5976        | XR 031113    | 0.00293591 |
| 10350297 | Kif14         | NM 001081258 | 0.0029383  |
| 10449377 | Spdef         | NM 013891    | 0.00294082 |
| 10417013 | Dnajc3        | NM 008929    | 0.00294222 |
| 10417034 | Dnajc3        | NM 008929    | 0.00294222 |
| 10342484 |               | ---          | 0.00294247 |
| 10455566 | Hsd17b4       | NM 008292    | 0.00294784 |
| 10438060 | Igll1         | ENSMUST00000 | 0.0029501  |
| 10502655 | Cyr61         | NM 010516    | 0.00295148 |
| 10585599 | Imp3          | NM 133976    | 0.00295249 |
| 10386110 | Hand1         | NM 008213    | 0.00295273 |
| 10394627 | Nbas          | BC057020     | 0.00295372 |
| 10409557 | H2afy         | NM 012015    | 0.00295467 |
| 10556938 | E130201H02Rik | NR 024324    | 0.00295865 |
| 10409579 | Cxcl14        | NM 019568    | 0.00295873 |
| 10394366 | Atad2b        | NM 001099628 | 0.00295913 |
| 10378440 |               | ---          | 0.00296075 |
| 10340580 |               | ---          | 0.00296281 |
| 10548086 | Rad51ap1      | NM 009013    | 0.00296464 |
| 10471171 | Fubp3         | NM 001033389 | 0.00296494 |
| 10436788 | Hunk          | NM 015755    | 0.00297037 |
| 10498599 | Ift80         | NM 026641    | 0.00297106 |
| 10389151 | Sifn10        | NM 181542    | 0.00297296 |
| 10449225 | Decr2         | NM 011933    | 0.0029731  |
| 10502240 | Npnt          | NM 033525    | 0.00297578 |
| 10532616 | Myo18b        | NM 028901    | 0.00297753 |
| 10372265 | Pik3r5        | NM 177320    | 0.00297931 |
| 10356020 | Dock10        | NM 175291    | 0.00297936 |
| 10393341 | Rhbdf2        | NM 172572    | 0.00298042 |
| 10567297 | Itripl2       | NM 001033380 | 0.00298219 |
| 10568355 | Pycard        | NM 023258    | 0.00298317 |
| 10397002 | Sipa11l       | NM 172579    | 0.00298331 |
| 10574985 | Sic7a6        | NM 178798    | 0.00298509 |
| 10404575 |               | ---          | 0.00298669 |
| 10394288 | Itsn2         | NM 011365    | 0.00299142 |
| 10341039 |               | ---          | 0.00299634 |
| 10574184 | Rspry1        | NM 026274    | 0.00299827 |
| 10339824 |               | ---          | 0.00299844 |
| 10586168 | Snord16a      | AF357363     | 0.00300056 |
| 10435226 | Snx4          | NM 080557    | 0.0030011  |
| 10483604 | Sic25a12      | NM 172436    | 0.00300214 |
| 10352143 | Kif26b        | NM 001161665 | 0.0030045  |
| 10488804 | Gm14214       | XR 031617    | 0.003005   |
| 10358709 | Cox7b         | NM 025379    | 0.00300568 |
| 10421184 | Loxl2         | ENSMUST00000 | 0.0030077  |
| 10339205 |               | ---          | 0.00301018 |
| 10470349 | Adamts13      | NM 001001322 | 0.00301411 |
| 10502405 | Metap1        | NM 175224    | 0.0030149  |
| 10421581 | Lrch1         | NM 001033439 | 0.00301891 |
| 10607169 | Trpc5         | NM 009428    | 0.00301892 |
| 10365290 | Chet11        | NM 021439    | 0.00301927 |
| 10523168 | Epan          | NM 053087    | 0.00302051 |
| 10338367 |               | ---          | 0.0030227  |
| 10496555 | Gbp1          | NM 010259    | 0.0030245  |
| 10505779 | Acer2         | NM 139306    | 0.003025   |
| 10488459 | Zfp442        | BC023805     | 0.00302882 |
| 10450814 | Ppp1r1        | NM 029632    | 0.00303046 |
| 10468891 | Gm7102        | AK163227     | 0.00303077 |
| 10525381 | Vps29         | NM 019780    | 0.00303396 |
| 10499095 | Fam160a1      | NM 172682    | 0.00304277 |
| 10385665 | Zfp354b       | NM 013744    | 0.00304589 |
| 10344922 | Gm16393       | XR 031240    | 0.0030488  |
| 10507218 | Mknk1         | NM 021461    | 0.00305063 |
| 10422707 | Prkaa1        | NM 001013367 | 0.00305141 |
| 10405464 | Grk6          | NM 001038018 | 0.00305155 |
| 10357886 |               | ---          | 0.00305187 |
| 10401343 | Map3k9        | NM 177395    | 0.00305197 |
| 10344713 | Ahcy          | NM 016661    | 0.00305618 |
| 10343032 | I117a         | NM 010552    | 0.00305839 |
| 10394593 | Fam49a        | NM 029758    | 0.0030597  |
| 10441864 | Mlt4          | NM 010806    | 0.00305872 |
| 10451142 | Gm7325        | DQ190000     | 0.00306301 |
| 10394892 | Cpsf3         | NM 018813    | 0.0030632  |
| 10378739 | Ywhae         | NM 009536    | 0.00306725 |
| 10494551 | Acp6          | NM 019800    | 0.00306777 |
| 10448089 | Oaz1          | NM 008753    | 0.0030689  |
| 10566333 | 9230105E10Rik | NM 001146007 | 0.00307055 |
| 10400544 | Rpl21         | NM 019647    | 0.00307296 |
| 10433963 | Ydjc          | NM 026940    | 0.00307551 |
| 10478922 |               | ---          | 0.00307579 |
| 10451465 | Ptcr          | NM 011195    | 0.00307946 |
| 10602501 | Huwe1         | NM 021523    | 0.00308236 |
| 10338463 |               | ---          | 0.0030853  |
| 10548207 | Pzp           | NM 007376    | 0.00308555 |
| 10498827 | Fnlp2         | NM 001162999 | 0.00308592 |
| 10385518 | Tatp          | NM 011579    | 0.00309066 |
| 10473507 | Olf1093       | NM 146366    | 0.00309409 |
| 10352150 |               | ---          | 0.00309598 |
| 10419742 | Olf49         | NM 010991    | 0.00309904 |
| 10339894 |               | ---          | 0.00310157 |
| 10515028 | Zfyve9        | NM 183300    | 0.00311086 |
| 10466938 | S033414D02Rik | BC024953     | 0.00311132 |
| 10386949 | Hmgbl         | NM 010439    | 0.0031141  |
| 10454077 | Taf4b         | NM 001100449 | 0.00311434 |
| 10565759 | Uvrag         | NM 178635    | 0.00311482 |
| 10344813 | Cspp1         | NM 026493    | 0.00311517 |
| 10576639 | Nrp1          | NM 008737    | 0.00311609 |

|          |               |               |            |
|----------|---------------|---------------|------------|
| 10577065 | Gm7606        | XR_032000     | 0.00311909 |
| 10367919 | Stx11         | BC118516      | 0.00312979 |
| 10555262 | Xrra1         | BC151014      | 0.00313123 |
| 10482249 | Nr6a1         | NM_010264     | 0.00313167 |
| 10407707 | Gm10336       | ENSMUST000000 | 0.00313321 |
| 10341429 |               | ---           | 0.00313394 |
| 10403604 | Lyst          | NM_010748     | 0.00313841 |
| 10581996 | Cdyl2         | NM_029441     | 0.00314952 |
| 10385966 | Anxa6         | NM_013472     | 0.00314996 |
| 10410687 |               | ---           | 0.0031537  |
| 10456727 | Dym           | NM_027727     | 0.00315486 |
| 10566597 | Olfre98       | NM_146602     | 0.00315687 |
| 10343419 |               | ---           | 0.00316009 |
| 10467529 | Opalin        | NM_153520     | 0.00316016 |
| 10443527 | Pim1          | NM_008842     | 0.00316058 |
| 10422509 |               | ---           | 0.00316165 |
| 10517301 | Ldirap1       | NM_145554     | 0.00316563 |
| 10383819 | Sec14l2       | NM_144520     | 0.00316565 |
| 10454606 | Wdr36         | NM_001110015  | 0.00316608 |
| 10376461 | Trim11        | NM_053168     | 0.00316832 |
| 10552656 | Syt3          | NM_016663     | 0.00316848 |
| 10414537 | Ang           | NM_001161731  | 0.00317137 |
| 10392261 | Smurf2        | NM_025481     | 0.00317464 |
| 10390519 | Pkxdc1        | NM_028199     | 0.00318405 |
| 10366048 | B530045E10Rik | ENSMUST000000 | 0.00318513 |
| 10340528 |               | ---           | 0.00318555 |
| 10384219 | Gm11977       | XR_033922     | 0.00318594 |
| 10376033 | Kif3a         | NM_008443     | 0.00318732 |
| 10435769 | Zbtb20        | NM_019778     | 0.00318824 |
| 10499045 | Trim2         | NM_030706     | 0.00319481 |
| 10404065 | Hist1h3f      | NM_013548     | 0.00319594 |
| 10544417 | Epha1         | NM_023580     | 0.00319695 |
| 10545974 | Antxr1        | NM_054041     | 0.00319847 |
| 10392098 | Ftsj3         | NM_025310     | 0.00320542 |
| 10538584 |               | ---           | 0.00320667 |
| 10408490 | Exoc2         | NM_025588     | 0.00320816 |
| 10379228 | Nos2          | NM_010927     | 0.00320944 |
| 10559652 | Clec4e2       | NM_011324     | 0.00321401 |
| 10536973 | 1700023L04Rik | ENSMUST000000 | 0.00321526 |
| 10515452 | Gm1661        | NM_001145637  | 0.00321559 |
| 10383212 |               | ---           | 0.00321945 |
| 10405918 | Rsl1          | NM_001013769  | 0.00322216 |
| 10585990 | Myo9a         | NM_173018     | 0.00322313 |
| 10341411 |               | ---           | 0.00322589 |
| 10473240 | Eno1          | NM_023119     | 0.0032262  |
| 10415678 | Cab39l        | NM_026908     | 0.00322706 |
| 10372094 |               | ---           | 0.00322774 |
| 10458461 | Hdac3         | NM_010411     | 0.0032294  |
| 10424363 | Nsmce2        | NM_026746     | 0.00323392 |
| 10436426 | Oral2         | NM_178751     | 0.00323692 |
| 10380622 | Hoxb9         | NM_008270     | 0.00323782 |
| 10422312 | Cldn10        | NM_023878     | 0.00323962 |
| 10499639 | Cks1b         | NM_016904     | 0.00324051 |
| 10539433 | Mobk1b        | ENSMUST000000 | 0.00324141 |
| 10605172 | Ard1a         | NM_019870     | 0.00324332 |
| 10542911 | Samd9l        | NM_010156     | 0.00324461 |
| 10474793 | Pak6          | NM_001033254  | 0.00324644 |
| 10340250 |               | ---           | 0.00325069 |
| 10338040 |               | ---           | 0.00325323 |
| 10561942 | Kirrel2       | NM_172898     | 0.0032543  |
| 10486026 | Zfp770        | NM_175466     | 0.00325593 |
| 10544588 | Gimap3        | NM_031247     | 0.00325627 |
| 10403511 | Heatr1        | NM_144835     | 0.00326334 |
| 10550102 | Lig1          | NM_001083188  | 0.00326362 |
| 10344126 |               | ---           | 0.00326397 |
| 10542395 | Atf7ip        | ENSMUST000000 | 0.0032673  |
| 10552708 | Kcnc3         | NM_008422     | 0.00326909 |
| 10346348 | Spats2l       | BC021879      | 0.00327204 |
| 1048589  | Fam110a       | NM_028666     | 0.00327464 |
| 10488929 | Efrf6         | NM_010579     | 0.00327473 |
| 10475502 | Slc28a2       | AF079853      | 0.00327665 |
| 10344466 |               | ---           | 0.00327751 |
| 10584122 | Rpl21         | BC094410      | 0.00327942 |
| 10413212 | Zmiz1         | NM_183208     | 0.0032908  |
| 10487969 | Trmt6         | NM_175113     | 0.00329084 |
| 10371959 | Elk3          | NM_013508     | 0.00329272 |
| 10402195 | Tc2n          | NM_028924     | 0.0032933  |
| 10432972 | Rarg          | NM_011244     | 0.00329704 |
| 10451195 | 1600014C23Rik | ENSMUST000000 | 0.00329768 |
| 10388234 | Gsc2          | NM_010352     | 0.00330076 |
| 10557405 | Rabep2        | NM_030566     | 0.00330552 |
| 10490903 | Car13         | NM_024495     | 0.00330717 |
| 10558150 | Htra1         | NM_019564     | 0.00330972 |
| 10519691 | Gm3360        | XR_032742     | 0.00331098 |
| 10496854 | Ttl7          | NM_027594     | 0.00331397 |
| 10486059 |               | ---           | 0.00331401 |
| 10425905 | Nup50         | NM_016714     | 0.00331625 |
| 10404014 | V1ri10        | NM_134245     | 0.00331635 |
| 10542596 | Slco1c1       | NM_021471     | 0.00331991 |
| 10502575 | Clec4e        | NM_139148     | 0.00332628 |
| 10590597 | Sacm1l        | NM_030692     | 0.00333042 |
| 10397557 |               | ---           | 0.00333082 |
| 10375793 | Olfre51       | NM_146909     | 0.00333433 |
| 10338160 |               | ---           | 0.00333444 |
| 10504373 | Gm12472       | ENSMUST000000 | 0.00333523 |
| 10409709 |               | ---           | 0.0033374  |
| 10595622 |               | ---           | 0.00333961 |
| 10595636 |               | ---           | 0.00333961 |
| 10439411 | Nr1i2         | NM_010936     | 0.00334406 |
| 10332983 |               | ---           | 0.00334448 |
| 10344134 |               | ---           | 0.00334769 |
| 10496322 | Gm9799        | ENSMUST000000 | 0.00334806 |
| 10561337 | 1700049G17Rik | NM_028538     | 0.00334904 |
| 10554963 | Gm5899        | XM_620527     | 0.00335066 |
| 10399696 | Rnf144a       | NM_001081977  | 0.00335179 |
| 10377725 | Dlg4          | NM_007864     | 0.00335276 |
| 10533945 | Ubc           | NM_019639     | 0.00335636 |
| 10369290 | Ddit4         | NM_029083     | 0.00335686 |
| 10351603 | Arhgap30      | NM_001005508  | 0.00335864 |
| 10586064 | Anp32a        | NM_009672     | 0.00336182 |
| 10425421 | Fam83f        | NM_145986     | 0.00336204 |
| 10455959 |               | ---           | 0.00336368 |
| 10481827 | Zbtb34        | NM_001085507  | 0.00336632 |
| 10473612 | Olfre1202     | NM_146462     | 0.00336651 |
| 10578277 |               | ---           | 0.00336675 |
| 10338969 |               | ---           | 0.00336706 |
| 10442147 | V1re6         | NM_134195     | 0.00336912 |
| 10575095 | Has3          | NM_008217     | 0.00337004 |
| 10499420 | Robld3        | NM_031248     | 0.00337179 |
| 10381109 | Gm11565       | NM_001126323  | 0.00337375 |
| 10557313 | 4930533L02Rik | ENSMUST000000 | 0.00337578 |
| 10486681 | Tim5          | NM_028799     | 0.00337596 |
| 10438069 | Ypel1         | NM_023249     | 0.00337991 |
| 10429944 | Scrt1         | NM_130893     | 0.00338306 |
| 10354404 | Dnajb6        | NM_001037940  | 0.00338439 |
| 10376897 |               | ---           | 0.00338565 |
| 10354203 |               | ---           | 0.0033895  |
| 10524227 | 2410025L10Rik | NM_001142642  | 0.00339045 |



|          |               |               |            |
|----------|---------------|---------------|------------|
| 10562399 | Kctd15        | NM_146188     | 0.00339776 |
| 10355668 |               | ---           | 0.00339879 |
| 10491014 | Hltf          | NM_009210     | 0.00340675 |
| 10355931 | Farsb         | NM_011811     | 0.00341071 |
| 10605566 |               | ---           | 0.00341565 |
| 10472197 | Rpl29         | L08651        | 0.00341579 |
| 10387797 | Bcl6b         | NM_007528     | 0.00341594 |
| 10603000 | Rai2          | NM_198409     | 0.00341811 |
| 10371591 | 4930547N16Rik | NM_029249     | 0.00342743 |
| 10555846 |               | ---           | 0.00342746 |
| 10570437 | Fbxo25        | NM_025785     | 0.003428   |
| 10552258 |               | ---           | 0.00343113 |
| 10489004 | Nfs1          | NM_010911     | 0.00343258 |
| 10526038 | Mmp17         | NM_011846     | 0.00343574 |
| 10380109 | Hsf5          | NM_001045527  | 0.00343577 |
| 10352971 | Rblccc1       | NM_009826     | 0.00343766 |
| 10503856 | Cabrr2        | NM_008076     | 0.00344038 |
| 10488642 | Defb19        | NM_145157     | 0.00344373 |
| 10588893 | Rhoa          | NM_016802     | 0.00344649 |
| 10489878 | Ptgis         | NM_008968     | 0.0034474  |
| 10357133 |               | ---           | 0.00344944 |
| 10396421 | Hif1a         | NM_010431     | 0.00344957 |
| 10522749 | Lphn3         | NM_198702     | 0.00345623 |
| 10367122 | Baz2a         | NM_054078     | 0.00345647 |
| 10567564 | Cdr2          | NM_007672     | 0.00346217 |
| 10497944 | Mfsd8         | NM_028140     | 0.00346485 |
| 10464905 | Nras4         | NM_153553     | 0.00346696 |
| 10420483 | Phf11         | NM_172603     | 0.00346847 |
| 10543409 | Tas2r118      | NM_207022     | 0.00346888 |
| 10417065 | Rap2a         | NM_029519     | 0.00347059 |
| 10506668 | Yipf1         | NM_145550     | 0.00347498 |
| 10396795 | Eif2s1        | NM_026114     | 0.00347618 |
| 10585992 | Myo9a         | NM_173018     | 0.00348326 |
| 10383502 | Slc16a3       | NM_030696     | 0.00348387 |
| 10435237 | Zfp148        | NM_011749     | 0.00348605 |
| 10344127 |               | ---           | 0.00349026 |
| 10605455 |               | ---           | 0.00349055 |
| 10383756 | Ifitm2        | NM_030694     | 0.00349077 |
| 10492325 | Ube2v1        | NM_023230     | 0.0034912  |
| 10541729 | Cdca3         | NM_013538     | 0.00349295 |
| 10379998 | Trim37        | NM_197987     | 0.00349344 |
| 10377439 | Per1          | NM_001159367  | 0.00349649 |
| 10598107 | Taf1a         | NM_021466     | 0.00349938 |
| 10348739 | Sned1         | NM_172463     | 0.00350138 |
| 10513112 | Epb4.14b      | NM_019427     | 0.00350531 |
| 10533844 | Rilpl2        | NM_030259     | 0.00350884 |
| 10518132 | Prdm2         | NM_001081355  | 0.00350938 |
| 10343036 |               | ---           | 0.00351041 |
| 10371877 | Slc25a3       | NM_133668     | 0.00351125 |
| 10444291 | H2-Ab1        | NM_207105     | 0.00351514 |
| 10546661 | Foxp1         | NM_053202     | 0.00351776 |
| 10585706 | Cox5a         | NM_007747     | 0.00351934 |
| 10497203 | Hey1          | NM_010423     | 0.00352077 |
| 10445741 |               | ---           | 0.00352086 |
| 10568282 | Bcl7c         | NM_009746     | 0.00352165 |
| 10387525 | Mpdu1         | NM_011900     | 0.00352184 |
| 10461715 | Olfir1441     | NM_146683     | 0.00352187 |
| 10386005 | Atpf5f1       | NM_009725     | 0.0035224  |
| 10484756 | Olfir1197     | NM_001005225  | 0.0035224  |
| 10569429 | Cdkn1c        | NM_001161624  | 0.00352903 |
| 10478718 | Ncoa3         | NM_008679     | 0.003531   |
| 10421029 | Cdca2         | NM_175384     | 0.00353299 |
| 10511258 | Fam132a       | NM_026125     | 0.00353376 |
| 10532741 | Tmem119       | NM_146162     | 0.00353507 |
| 10554586 | 4833418N17Rik | AK080712      | 0.00353527 |
| 10583382 | Olfir834      | NM_001011823  | 0.00353832 |
| 10355511 | Tnp1          | NM_009407     | 0.00353859 |
| 10520950 | Pdlim1        | NM_016861     | 0.00353927 |
| 10521690 | Pplh          | NM_028677     | 0.00354261 |
| 10340497 |               | ---           | 0.00354267 |
| 10383214 | Rnf213        | AK173199      | 0.0035462  |
| 10553092 | Dbp           | NM_016974     | 0.00354663 |
| 10497321 | Pgam1         | NM_023418     | 0.0035509  |
| 10503695 | Bach2         | NM_007521     | 0.00355455 |
| 10581902 | Cfdp1         | NM_011801     | 0.00356032 |
| 10384622 | Ehbp1         | NM_153078     | 0.00356623 |
| 10522786 |               | ---           | 0.00356659 |
| 10371846 | Apaf1         | NM_001042558  | 0.00356705 |
| 10428763 | Atad2         | NM_027435     | 0.00357101 |
| 10487021 | Slc30a4       | NM_011774     | 0.00357287 |
| 10441394 |               | ---           | 0.00357446 |
| 10341998 |               | ---           | 0.00357803 |
| 10580169 | Ccdc130       | NM_026350     | 0.00358058 |
| 10580191 | Nfix          | NM_001081981  | 0.00358133 |
| 10550400 | Pnmal2        | NM_001099636  | 0.00358418 |
| 10583386 | Olfir835      | NM_001012266  | 0.00358668 |
| 10447634 | Gm9992        | NM_001142539  | 0.00358861 |
| 10379482 | Cdk5r1        | NM_009871     | 0.00358888 |
| 10544089 | Zc3hav1       | NM_028421     | 0.00358902 |
| 10489429 | Wif4c5        | NM_145369     | 0.00359363 |
| 10368654 | Nf5dc1        | NM_176968     | 0.00359687 |
| 10407892 | Cdc215        | NM_001081058  | 0.00359864 |
| 10491486 | Atp11b        | NM_029570     | 0.00359908 |
| 10403750 | 2810021B07Rik | NM_025479     | 0.00359961 |
| 10386789 | Ulk2          | NM_013881     | 0.00360036 |
| 10463263 | Lztf1         | NM_033322     | 0.00360172 |
| 10358563 | Hmcn1         | NM_001024720  | 0.00360379 |
| 10341046 |               | ---           | 0.00360665 |
| 10341813 |               | ---           | 0.00360834 |
| 10564888 | Unc45a        | NM_133952     | 0.00360906 |
| 10490986 | 4632415L05Rik | BC023403      | 0.00361094 |
| 10455595 | Eno1          | NM_023119     | 0.00361155 |
| 10431229 | Celsr1        | NM_009886     | 0.00361477 |
| 10599839 | Gm14661       | ENSMUST000000 | 0.00361664 |
| 10572241 | Pbx4          | NM_001024954  | 0.00361667 |
| 10518113 | 9030409G11Rik | NM_144531     | 0.00361716 |
| 10596231 | Dnajc13       | NM_001163026  | 0.00361948 |
| 10341540 |               | ---           | 0.00362486 |
| 10498720 | Zbbx          | NM_172515     | 0.00362675 |
| 10355246 | Acadl         | NM_007381     | 0.00362743 |
| 10472694 | 4923404M02Rik | NM_023744     | 0.00363017 |
| 10509023 | Syfr2         | NM_026780     | 0.0036318  |
| 10361104 | Ppp2r5a       | NM_144880     | 0.00363784 |
| 10570957 | Sfrp1         | NM_013834     | 0.00363876 |
| 10338209 |               | ---           | 0.00364221 |
| 10503188 | Chd7          | NM_001081417  | 0.00364529 |
| 10471385 |               | ---           | 0.00364713 |
| 10363430 | Psap          | NM_001146120  | 0.00364743 |
| 10578547 | Helt          | NM_173789     | 0.00365487 |
| 10364468 | Bsq           | NM_009768     | 0.00365557 |
| 10398297 |               | ---           | 0.00365572 |
| 10450868 | Olfir98       | NM_146510     | 0.00365898 |
| 10392983 | Slc25a19      | NM_026071     | 0.00366279 |
| 10338051 |               | ---           | 0.00366669 |
| 10469559 | Msrb2         | NM_029619     | 0.00367206 |
| 10565817 |               | ---           | 0.00367279 |
| 10473475 | Olfir1023     | NM_146587     | 0.00367484 |
| 10601854 | Wbp5          | NM_011712     | 0.00367689 |

|          |                 |               |            |
|----------|-----------------|---------------|------------|
| 10523541 | Mrps18c         | NM_026826     | 0.00367733 |
| 10404402 | Foxq1           | NM_008239     | 0.00368705 |
| 10350136 | Csrp1           | NM_007791     | 0.00369045 |
| 10340812 |                 | ---           | 0.00369184 |
| 10539741 | Aak1            | NM_001040106  | 0.00369254 |
| 10604599 |                 | ---           | 0.00369549 |
| 10493076 | Sh2d2a          | NM_021309     | 0.00369721 |
| 10573112 |                 | ---           | 0.00369781 |
| 10411532 | Mccc2           | NM_030026     | 0.00369822 |
| 10562360 | Gpi1            | NM_008155     | 0.00371002 |
| 10557738 | Ctf1            | NM_007795     | 0.00371771 |
| 10417273 | Esd             | NM_016903     | 0.0037194  |
| 10454483 | Wdr33           | NM_028866     | 0.00372088 |
| 10400357 | Baz1a           | NM_013815     | 0.00372101 |
| 10603228 |                 | ---           | 0.00372159 |
| 10473051 | Mga             | NM_013720     | 0.00372948 |
| 10369586 | Supv3l1         | NM_181423     | 0.00373404 |
| 10584368 | Olfrr884        | NM_001011798  | 0.00373837 |
| 10469353 | Fam23a          | NM_001081310  | 0.00373926 |
| 10474006 | Phf21a          | NM_001109691  | 0.00374096 |
| 10504458 | Ctla            | NM_001080385  | 0.00374366 |
| 10400319 | Gm10465         | ENSMUST000001 | 0.00374891 |
| 10568434 |                 | ---           | 0.00375056 |
| 10535095 | Zfand2a         | NM_133349     | 0.00375322 |
| 10430593 | Josd1           | NM_028792     | 0.00375411 |
| 10544501 | Ezh2            | NM_007971     | 0.00375714 |
| 10467508 | Bimk            | NM_008528     | 0.00375775 |
| 10589886 | 4930520004Rik   | ENSMUST000000 | 0.00376704 |
| 10517383 | Nipal3          | NM_028995     | 0.00376922 |
| 10548246 | Rpl21           | BC094410      | 0.00376994 |
| 10385903 | Pdlim4          | NM_019417     | 0.00377155 |
| 10542691 | Lrmp            | NM_008511     | 0.00377318 |
| 10458731 | Mcc             | NM_001085373  | 0.00377424 |
| 10498064 | Setd7           | NM_080793     | 0.00377545 |
| 10442037 | Zfp97           | NM_011765     | 0.00377559 |
| 10340478 |                 | ---           | 0.00377591 |
| 10438109 | Ube2l3          | NM_009456     | 0.00378142 |
| 10561104 | Axl             | NM_009465     | 0.00378594 |
| 10554367 | Mesp2           | NM_008589     | 0.00378593 |
| 10411332 | Hmgcr           | NM_008255     | 0.00379133 |
| 10452445 | 4930583109Rik   | ENSMUST000000 | 0.0037914  |
| 10563718 | Gm9717          | XM_001474409  | 0.00379187 |
| 10570963 | Zmat4           | NM_177086     | 0.00379454 |
| 10550601 | Snrpd2          | NM_026943     | 0.00379499 |
| 10403959 | RP23-38E20.1    | NM_001097979  | 0.00379541 |
| 10408087 | RP23-38E20.1    | NM_001097979  | 0.00379542 |
| 10554969 | Odz4            | NM_011858     | 0.00379629 |
| 10531790 | Nkx6-1          | NM_144985     | 0.00379912 |
| 10573998 | Ogfod1          | NM_177767     | 0.00380044 |
| 10592455 | Olfrr975        | NM_146828     | 0.00380277 |
| 10413697 | Pbrm1           | NM_001081251  | 0.00380384 |
| 10605711 | Pdk3            | NM_145630     | 0.00380453 |
| 10352798 | Kcnn1           | NM_010600     | 0.00380541 |
| 10344750 | Sgk3            | NM_133220     | 0.00380662 |
| 10503194 | Chd7            | NM_001081417  | 0.00380662 |
| 10574145 | Nlrc5           | FJ889356      | 0.00380762 |
| 10401365 | Zfyve1          | NM_183154     | 0.00381017 |
| 10344232 |                 | ---           | 0.00381306 |
| 10472408 | Csrmp3          | NM_153409     | 0.00381534 |
| 10420071 | Tm9sf1          | NM_028780     | 0.00381666 |
| 10571860 | Hand2           | NM_010402     | 0.00381913 |
| 10349404 | Mgat5           | NM_145128     | 0.00382016 |
| 10339714 |                 | ---           | 0.00382117 |
| 10338810 |                 | ---           | 0.00382259 |
| 10353574 | Col19a1         | NM_007733     | 0.00382287 |
| 10378754 | Fam57a          | NM_027773     | 0.00382458 |
| 10378649 | Slc43a2         | NM_173388     | 0.00382591 |
| 10554249 | Acan            | NM_007424     | 0.00382978 |
| 10486112 | Bmf             | NM_138313     | 0.00383274 |
| 10383200 |                 | ---           | 0.00383308 |
| 10453766 | Thoc1           | NM_153552     | 0.00383638 |
| 10512774 | Coro2a          | NM_178893     | 0.00383777 |
| 10416266 | Ppp3cc          | NM_008915     | 0.00384222 |
| 10366131 | 1700017N19Rik   | NM_001081246  | 0.00384252 |
| 10575034 | Cdh3            | NM_001037809  | 0.00384443 |
| 10554574 | Tm6sf1          | NM_145375     | 0.00384666 |
| 10467182 | Htr7            | NM_008315     | 0.00384847 |
| 10507160 | Cyp4a12b        | BC060945      | 0.00385639 |
| 10477970 | Src             | NM_009271     | 0.00385823 |
| 10394862 | Ddef2           | NM_001135192  | 0.00385983 |
| 10499917 | Lce1a2          | NM_028625     | 0.00386027 |
| 10594418 | Smad6           | NM_008542     | 0.00386449 |
| 10455533 | Eif1a           | NM_010120     | 0.00386672 |
| 10365729 | Pctk2           | NM_146239     | 0.00386675 |
| 10596904 | Ccdc36          | NM_001135198  | 0.00386695 |
| 10416371 | Lpar6           | NM_175116     | 0.00387652 |
| 10388861 | Tmem199         | NM_199199     | 0.00387743 |
| 10524889 | Ksr2            | NM_001114545  | 0.00388101 |
| 10598064 |                 | ---           | 0.0038821  |
| 10345616 | Lipt1           | NM_001037918  | 0.0038851  |
| 10382846 | BC018473        | NR_003364     | 0.00388531 |
| 10600545 | Hmqb1           | NM_010439     | 0.00388571 |
| 10461391 | Pcna            | NM_011045     | 0.00388644 |
| 10554061 | Adamts17        | NM_001033877  | 0.00388902 |
| 10378114 | Ube2g1          | NM_025985     | 0.00389042 |
| 10355806 | Tuba4a          | NM_009447     | 0.00389789 |
| 10389482 |                 | ---           | 0.00389804 |
| 10439424 | 4932425124Rik   | NM_001081025  | 0.00389817 |
| 10498998 | D930015E06Rik   | BC062940      | 0.00390074 |
| 10408081 | Hist1h1b        | NM_020034     | 0.00390204 |
| 10457489 | 6030446N20Rik   | BC094382      | 0.00390349 |
| 10339249 |                 | ---           | 0.00390437 |
| 10514473 |                 | ---           | 0.00390604 |
| 10607557 |                 | ---           | 0.00390724 |
| 10434869 | Ccdc50          | NM_026202     | 0.00391069 |
| 10596747 | Sema3f          | NM_011349     | 0.00391074 |
| 10502419 | Rap1gds1        | NM_001040690  | 0.00391079 |
| 10497752 | Carhsp1         | NM_025821     | 0.00391255 |
| 10511099 | A530082C11Rik   | NM_177186     | 0.00391322 |
| 10529311 | ENSMUSG00000073 | AK144327      | 0.00391885 |
| 10340821 |                 | ---           | 0.00391942 |
| 10342705 |                 | ---           | 0.00392352 |
| 10567663 | Palb2           | NM_001081238  | 0.00392992 |
| 10466288 | Olfrr1428       | NM_146678     | 0.00393166 |
| 10396867 | Exd2            | NM_133798     | 0.00393167 |
| 10343757 |                 | ---           | 0.00393199 |
| 10438478 | Abcc5           | NM_013790     | 0.00393347 |
| 10407509 |                 | ---           | 0.00393743 |
| 10405870 | Vmn2r121        | NM_001100616  | 0.00394277 |
| 10388263 |                 | ---           | 0.00394501 |
| 10608719 |                 | ---           | 0.00394859 |
| 10598771 | Maoa            | NM_173740     | 0.00394941 |
| 10460621 | 1810058N15Rik   | ENSMUST000000 | 0.00395447 |
| 10485607 | Qser1           | NM_001123327  | 0.00395663 |
| 10398117 | Bdkrb2          | NM_009747     | 0.00396669 |
| 10343297 |                 | ---           | 0.00396723 |
| 10580082 | C330011M18Rik   | ENSMUST000000 | 0.00396909 |
| 10412665 | Rpl21           | BC138299      | 0.00397019 |

|          |               |               |            |
|----------|---------------|---------------|------------|
| 10574139 | Nirc5         | FJ889356      | 0.00397678 |
| 10538892 | LOC641050     | M11024        | 0.00398034 |
| 10338202 |               | ---           | 0.00398041 |
| 10566926 | Rnf141        | NM 025999     | 0.00398132 |
| 10352454 |               | ---           | 0.00398217 |
| 10414731 | LOC100045878  | ENSMUST000000 | 0.00398323 |
| 10496519 | Unc5c         | NM 009472     | 0.00398453 |
| 10504047 | Ube2r2        | NM 026275     | 0.00398729 |
| 10471563 | C130021120Rik | ENSMUST000000 | 0.00399196 |
| 10343151 |               | ---           | 0.00399246 |
| 10395604 | Gm9804        | ENSMUST000000 | 0.00399508 |
| 10391625 | Ubtf          | NM 011551     | 0.00400086 |
| 10575844 | Gdh13         | NM 019707     | 0.00400333 |
| 10339154 |               | ---           | 0.00400341 |
| 10384778 |               | ---           | 0.00400786 |
| 10600980 | Dgat2l6       | NM 001114084  | 0.00401333 |
| 10567086 | Cyp2r1        | NM 177282     | 0.00401418 |
| 10473024 | Agps          | NM 172666     | 0.00401697 |
| 10347873 | Agfg1         | NM 010472     | 0.00401953 |
| 10338150 |               | ---           | 0.00402585 |
| 10468180 | Psd           | NM 028627     | 0.00402777 |
| 10565292 | Arnt2         | NM 007488     | 0.00403325 |
| 10414493 | Olfr748       | NM 001011837  | 0.00403352 |
| 10513770 |               | ---           | 0.00403394 |
| 10503828 | Lyrm2         | NM 175364     | 0.00404326 |
| 10379633 | Slfn1         | NM 011407     | 0.00404505 |
| 10422013 | Klf12         | NM 010636     | 0.00405011 |
| 10539990 | Uroc1         | NM 144940     | 0.00405259 |
| 10458873 |               | ---           | 0.00406042 |
| 10354111 | Aff3          | NM 010678     | 0.00406231 |
| 10364841 | 9030607L17Rik | NM 027829     | 0.00406283 |
| 10379215 | Ift20         | NM 018854     | 0.00406508 |
| 10471424 | Fam102a       | NM 153560     | 0.00406653 |
| 10357698 | Tmcc2         | NM 178874     | 0.00406726 |
| 10466676 | I110059E24Rik | BC023385      | 0.00406774 |
| 10596093 | Gm5161        | XM 356179     | 0.00406993 |
| 10402347 | Ifi2712a      | NM 029803     | 0.00406995 |
| 10376956 | Hs1st2a1      | NM 178870     | 0.00407532 |
| 10499652 | 4632404H12Rik | ENSMUST000000 | 0.00407687 |
| 10493519 | Shc1          | NM 001113331  | 0.00407687 |
| 10590791 | Birc2         | NM 007465     | 0.0040828  |
| 10577412 | 6820431F20Rik | BC025151      | 0.00408748 |
| 10585986 | Myo9a         | NM 173018     | 0.00408794 |
| 10375679 | Tbc1d9b       | NM 029745     | 0.00408883 |
| 10383615 | Metrl         | NM 144797     | 0.00409051 |
| 10483624 | Dlx1as        | NR 002854     | 0.00409139 |
| 10410173 | Hlat1         | NM 133680     | 0.00409432 |
| 10604687 | Hmgt1         | NM 146234     | 0.00409442 |
| 10432243 | Fkbp11        | NM 024169     | 0.00409725 |
| 10369661 | Ccar1         | NM 026201     | 0.0040984  |
| 10479159 | Zfp831        | NM 001099328  | 0.0041002  |
| 10450418 | Ly6g6d        | NM 033478     | 0.00410272 |
| 10456599 | Gm9925        | ENSMUST000000 | 0.0041031  |
| 10593384 | Dixdc1        | NM 178118     | 0.00410571 |
| 10489451 | Semg1         | NM 017390     | 0.00410625 |
| 10568553 | Chst15        | NM 029935     | 0.00410686 |
| 10581558 | Rps26         | NM 013765     | 0.00410747 |
| 10341968 |               | ---           | 0.00411448 |
| 10343507 |               | ---           | 0.00411629 |
| 10364888 | Dot1l         | ENSMUST000000 | 0.00411657 |
| 10343365 |               | ---           | 0.00412551 |
| 10451860 | Pot1b         | NM 028370     | 0.00412719 |
| 10380341 | Spag9         | NM 027569     | 0.00412822 |
| 10341873 |               | ---           | 0.00413061 |
| 10416393 | Gm6986        | XR 034309     | 0.00413302 |
| 10457948 | Slc25a46      | NM 026165     | 0.00413348 |
| 10430140 | Mb            | NM 013593     | 0.00413819 |
| 10571321 | Ppp1r3b       | NM 177741     | 0.00413849 |
| 10477737 | Gdf5          | NM 008109     | 0.00414272 |
| 10339074 |               | ---           | 0.00414518 |
| 10470816 | Gle1          | NM 028923     | 0.00414614 |
| 10529299 | Slbp          | NM 009193     | 0.00415098 |
| 10347210 | Gm15456       | ENSMUST000000 | 0.00415419 |
| 10597960 | Slc6a20a      | NM 139142     | 0.00415876 |
| 10575861 | Hsbp1         | NM 024219     | 0.0041602  |
| 10342175 |               | ---           | 0.00416085 |
| 10413434 | D14Abb1e      | NM 001114879  | 0.00416252 |
| 10551791 | Zfp420        | BC055817      | 0.00416415 |
| 10554723 |               | ---           | 0.00416594 |
| 10578193 | Er1           | NM 026067     | 0.00416731 |
| 10342411 |               | ---           | 0.004168   |
| 10467941 | Cwfl9l1       | NM 001081077  | 0.00416959 |
| 10364417 | Olfr8         | NM 207201     | 0.00417158 |
| 10380672 | Skap1         | NM 001033186  | 0.00417318 |
| 10345930 | Tpp2          | NM 009418     | 0.00417771 |
| 10439471 | Ktelc1        | NM 172380     | 0.00417835 |
| 10444587 |               | ---           | 0.0041799  |
| 10384154 | Myo1g         | NM 178440     | 0.00418502 |
| 10536635 | A430107O13Rik | BC151018      | 0.00418565 |
| 10529082 | Mpv17         | NM 008622     | 0.00419051 |
| 10398424 |               | ---           | 0.00419527 |
| 10486697 | Tgm7          | NM 001160424  | 0.00419947 |
| 10580282 | Jumb          | NM 008416     | 0.00420044 |
| 10343468 |               | ---           | 0.00420694 |
| 10418903 | Gprin2        | NM 183209     | 0.00420922 |
| 10511069 | Gnb1          | NM 008142     | 0.0042099  |
| 10557470 | Gdpp3         | NM 024228     | 0.00421116 |
| 10373498 | Rps26         | NM 013765     | 0.00421166 |
| 10353341 | Hmgb1         | NM 010439     | 0.00421662 |
| 10521811 |               | ---           | 0.00421805 |
| 10462217 | Dmrt1         | NM 015826     | 0.00421829 |
| 10544939 |               | ---           | 0.00422014 |
| 10412562 | Flnb          | NM 134080     | 0.00422196 |
| 10342840 |               | ---           | 0.00422259 |
| 10601473 | Apool         | NM 026565     | 0.00422957 |
| 10349316 | Tmem185b      | NM 146103     | 0.00423074 |
| 10409689 | Hnmpk         | NM 025279     | 0.00423336 |
| 10342137 |               | ---           | 0.00423382 |
| 10342021 |               | ---           | 0.00423962 |
| 10343073 |               | ---           | 0.00423991 |
| 10513587 | Rnf183        | NM 153504     | 0.00424131 |
| 10439881 | S330426P16Rik | ENSMUST000000 | 0.00424285 |
| 10559361 | Fgf3          | NM 008007     | 0.00424331 |
| 10561369 | BC089491      | NM 175033     | 0.00424332 |
| 10565255 | 9930013L23Rik | NM 030728     | 0.00424346 |
| 10555007 |               | ---           | 0.00424517 |
| 10449596 |               | ---           | 0.00424527 |
| 10448748 | Nubp2         | NM 011956     | 0.00424683 |
| 10560103 | Rps8          | NM 009098     | 0.00424956 |
| 10495596 | Frts1         | NM 001113478  | 0.0042502  |
| 10588243 | Ryk           | NM 013649     | 0.00425036 |
| 10600765 | Pcyt1b        | NM 211138     | 0.00425088 |
| 10364824 | Csnk1q2       | NM 134002     | 0.00425838 |
| 10495405 | Slc25a24      | NM 172685     | 0.00426266 |
| 10590962 | I700012B09Rik | BC092535      | 0.00426332 |
| 10538394 | Plekha8       | NM 001001335  | 0.00426412 |
| 10489266 | Chd6          | NM 173368     | 0.00426419 |
| 10425109 | Elfn2         | NM 183141     | 0.00426576 |

|          |               |               |            |
|----------|---------------|---------------|------------|
| 10426656 | Prph          | NM_013639     | 0.00426691 |
| 10481868 | Dnajb6        | NM_011847     | 0.00426734 |
| 10481114 | Abo           | NM_030718     | 0.00427119 |
| 10374354 |               | ---           | 0.00427673 |
| 10397359 | Batf          | NM_016767     | 0.00427887 |
| 10336667 | Ptprz1        | NM_001081306  | 0.00427971 |
| 10441956 | Fam120b       | NM_024203     | 0.00428441 |
| 10383235 | A730011L01Rik | NM_177394     | 0.00428836 |
| 10362245 | Epb4_112      | NM_013511     | 0.00428998 |
| 10423577 | Mtdh          | NM_026002     | 0.00429231 |
| 10607433 | Magea3        | NM_020017     | 0.00429234 |
| 10515242 | Nsun4         | NM_028142     | 0.00429711 |
| 10591706 | Elavl3        | NM_010487     | 0.00429885 |
| 10506298 | Leprot        | NM_175036     | 0.00429888 |
| 10380699 | Copz2         | NM_019877     | 0.00430111 |
| 10608715 |               | ---           | 0.00430426 |
| 10449893 | A430107D22Rik | NM_178785     | 0.00430565 |
| 10518329 | Rpl28         | NM_009081     | 0.00430852 |
| 10399290 | 4930417G10Rik | BC138846      | 0.00431154 |
| 10538590 | Herc5         | ENSMUST000000 | 0.00431551 |
| 10427148 | Zfp740        | NM_153194     | 0.00431597 |
| 10457967 | Myo7b         | NM_032394     | 0.00431652 |
| 10444717 | D17H65S3E     | NM_033477     | 0.00431688 |
| 10342472 |               | ---           | 0.00431925 |
| 10416242 | Pebp4         | NM_028560     | 0.00431931 |
| 10475080 | Mapkbp1       | NM_011941     | 0.00432339 |
| 10469567 | Ptf1a         | NM_018809     | 0.00432907 |
| 10344371 |               | ---           | 0.00432977 |
| 10509620 | Capzb         | NM_001037761  | 0.00433384 |
| 10522668 | Paics         | NM_025939     | 0.00433466 |
| 10340849 |               | ---           | 0.00433642 |
| 10344244 |               | ---           | 0.00433704 |
| 10501744 | 1700061117Rik | ENSMUST000000 | 0.00433813 |
| 10489065 | Ndrp3         | NM_013865     | 0.00433904 |
| 10481592 | Dnm1          | NM_010065     | 0.00434038 |
| 10434932 | Fam43a        | NM_177632     | 0.00434145 |
| 10525961 | Pwml1         | NM_021311     | 0.00434206 |
| 10392904 | Uchl1p        | NM_176847     | 0.00434379 |
| 10468300 | Callhm1       | NM_001081271  | 0.00434503 |
| 10397281 | Yipm1         | NM_178363     | 0.00434821 |
| 10565422 | Tyr           | NM_011661     | 0.00434909 |
| 10435271 | Heg1          | NM_175256     | 0.00435022 |
| 10421970 |               | ---           | 0.00435232 |
| 10514388 |               | ---           | 0.004359   |
| 10410560 | Trip13        | NM_027182     | 0.00435964 |
| 10578477 | Fam149a       | NM_153535     | 0.00437227 |
| 10370334 | Lrrc3         | NM_145152     | 0.00437471 |
| 10539008 | Vps24         | NM_025783     | 0.00437607 |
| 10480087 | LOC675534     | XR_032234     | 0.00437712 |
| 10340007 |               | ---           | 0.00437844 |
| 10512024 | Mobk12b       | NM_178061     | 0.00438131 |
| 10602975 |               | ---           | 0.00438773 |
| 10457203 |               | ---           | 0.00438994 |
| 10454720 | Stambp        | NM_024239     | 0.00439253 |
| 10406466 | Tmem161b      | NM_175187     | 0.00439404 |
| 10425335 | Syngn1        | NM_207708     | 0.00439958 |
| 10461594 | Ms4a4c        | NM_029499     | 0.00440003 |
| 10446771 | Lclat1        | NM_001081071  | 0.00440268 |
| 10338077 |               | ---           | 0.00440591 |
| 10385893 | Slc22a4       | NM_019687     | 0.00440772 |
| 10598626 | Tspan7        | NM_019634     | 0.00440787 |
| 10366043 | Dusp6         | NM_026268     | 0.00440927 |
| 10460466 | Ccdc87        | NM_207268     | 0.00441336 |
| 10545771 | Cyp26b1       | NM_175475     | 0.00441476 |
| 10542120 | Clec2l        | NM_020257     | 0.00441599 |
| 10495964 | Neurog2       | NM_009718     | 0.00441881 |
| 10412844 | Top2b         | NM_009409     | 0.00442435 |
| 10527516 | Wasf3         | NM_145155     | 0.00442555 |
| 10514193 |               | ---           | 0.00442711 |
| 10542365 |               | ---           | 0.00442779 |
| 10408239 | Hist1h3f      | NM_013548     | 0.00442891 |
| 10391066 | Krt17         | NM_010663     | 0.00443177 |
| 10358124 | Pkp1          | NM_019645     | 0.00443451 |
| 10570236 | Mcf2l         | NM_178076     | 0.00443482 |
| 10409044 | 4931429P17Rik | ENSMUST000000 | 0.00443484 |
| 10388065 | Nlrp1b        | NM_001162414  | 0.00443508 |
| 10402063 | Foxn3         | BC029185      | 0.00443565 |
| 10466200 | Ms4a7         | NM_027836     | 0.00443821 |
| 10568651 | Dhx32         | NM_133941     | 0.00443945 |
| 10583436 | Olfir869      | NM_146557     | 0.00444324 |
| 10338581 |               | ---           | 0.00444801 |
| 10360334 | Olfir1408     | NM_146764     | 0.00445108 |
| 10338295 |               | ---           | 0.00445196 |
| 10394798 | Gm9229        | XR_034692     | 0.00445571 |
| 10605429 | Gm8666        | XR_034103     | 0.00445682 |
| 10420631 | Ebpl          | NM_026598     | 0.00445749 |
| 10342936 |               | ---           | 0.00445959 |
| 10471443 | Pip5k1l       | NM_198191     | 0.00446087 |
| 10436471 | Cggbp1        | NM_178647     | 0.00446465 |
| 10424236 | Doc2k9        | NM_001081039  | 0.00446504 |
| 10546217 | Chchd6        | NM_025351     | 0.0044653  |
| 10565689 | Capn5         | NM_007602     | 0.00447009 |
| 10477551 | 1700003F12Rik | DQ080431      | 0.00447086 |
| 10603302 |               | ---           | 0.00447273 |
| 10563641 | Rap1a         | NM_145541     | 0.0044728  |
| 10347790 |               | ---           | 0.00447421 |
| 10521469 |               | ---           | 0.00447823 |
| 10468885 | Zfp826        | ENSMUST000000 | 0.0044822  |
| 10343307 |               | ---           | 0.00448321 |
| 10553430 | Slc6a5        | NM_001146013  | 0.00448617 |
| 10565815 | Gm4980        | ENSMUST000000 | 0.0044957  |
| 10436253 | Semp7         | NM_025483     | 0.00449602 |
| 10504755 |               | ---           | 0.00449608 |
| 10424064 | 4930548G14Rik | ENSMUST000000 | 0.00449743 |
| 10379654 | Ap2b1         | NM_001035854  | 0.00449785 |
| 10458569 | Nr3c1         | NM_008173     | 0.00449894 |
| 10434835 | Leprel1       | NM_173379     | 0.00449968 |
| 10430660 | Pdgfrb        | NM_011057     | 0.00449969 |
| 10346250 | Mstn          | NM_010834     | 0.00450635 |
| 10467319 | Rbp4          | NM_001159487  | 0.00450684 |
| 10594246 | Gm10655       | ENSMUST000000 | 0.00452095 |
| 10338976 |               | ---           | 0.00452126 |
| 10468762 | 4930506M07Rik | NM_001114312  | 0.00452273 |
| 10357476 |               | ---           | 0.00452681 |
| 10588482 | Wdr51a        | NM_027354     | 0.00452881 |
| 10357381 | Ysk4          | XM_914055     | 0.00453216 |
| 10479752 | Olah          | NM_145921     | 0.00453429 |
| 10381860 | Mettl2        | NM_172567     | 0.00454046 |
| 10607111 | Gm4995        | XM_908302     | 0.00454079 |
| 10510053 | Lrrc38        | NM_001162983  | 0.00454516 |
| 10407346 |               | ---           | 0.00454687 |
| 10394929 | Gm9292        | AK132630      | 0.00454697 |
| 10492552 | Gm7270        | XR_030809     | 0.00454712 |
| 10383767 | Osbp2         | NM_152818     | 0.00455527 |
| 10578262 |               | ---           | 0.00455974 |
| 10379363 | Atad5         | NM_001029856  | 0.00456407 |
| 10492516 | Iqgj          | NM_177585     | 0.00456512 |
| 10395259 | Nampt         | NM_021524     | 0.00456693 |

|          |                  |               |            |
|----------|------------------|---------------|------------|
| 10366350 | Krr1             | NM_178610     | 0.00456748 |
| 10530283 |                  | ---           | 0.00456885 |
| 10526564 | Ufsp1            | NM_027356     | 0.00457032 |
| 10598089 |                  | ---           | 0.00457335 |
| 10376579 | Lrrc48           | NM_029044     | 0.00457961 |
| 10487645 | Cxcm1            | NM_019696     | 0.00458086 |
| 10479869 | Cdc123           | NM_133837     | 0.00458421 |
| 10521031 | Ywhah            | NM_011738     | 0.00458969 |
| 10520080 | Rint1            | NM_177323     | 0.00459449 |
| 10469816 | Il1r1            | NM_031167     | 0.00459589 |
| 10413282 | Fam116a          | NM_001134465  | 0.00459703 |
| 10343383 |                  | ---           | 0.00459738 |
| 10459925 | Pqlc1            | NM_025861     | 0.00460119 |
| 10497912 | Gm5148           | NM_198657     | 0.0046051  |
| 10365574 | Pmch             | NM_029971     | 0.00460544 |
| 10359375 | Gpr52            | NM_001146330  | 0.00460951 |
| 10593887 | Neil1            | NM_028347     | 0.00461238 |
| 10491678 | Adad1            | NM_009350     | 0.00461275 |
| 10404127 | Hist1h2aa        | NM_175658     | 0.00461323 |
| 10340493 |                  | ---           | 0.00461351 |
| 10344508 |                  | ---           | 0.00461367 |
| 10413989 | Gm626            | XM_985917     | 0.00461373 |
| 10463643 |                  | ---           | 0.00461401 |
| 10539795 | Gkn2             | NM_025467     | 0.00461617 |
| 10401511 | Tmem90a          | NM_001033334  | 0.00462067 |
| 10372230 | Myf6             | NM_008657     | 0.0046237  |
| 10407782 | Mgl1             | NM_010796     | 0.00463401 |
| 10339949 |                  | ---           | 0.00463472 |
| 10504611 | E230008N13Rik    | ENSMUST000000 | 0.00463524 |
| 10546884 | Lhfp14           | NM_177763     | 0.00463721 |
| 10353288 | Ube2w            | NM_025773     | 0.00463884 |
| 10386157 |                  | ---           | 0.00464234 |
| 10392484 | Abca8b           | NM_013851     | 0.00464429 |
| 10342761 |                  | ---           | 0.00464431 |
| 10543725 | Tsqa14           | NM_031998     | 0.00464477 |
| 10344173 |                  | ---           | 0.00464788 |
| 10385500 | Irgm1            | NM_008326     | 0.00465064 |
| 10491056 | Tbl1xr1          | NM_030732     | 0.00465275 |
| 10358434 | Pla2g4a          | NM_008869     | 0.00465399 |
| 10396030 | Fancm            | NM_178912     | 0.0046551  |
| 10472794 | Metap1           | NM_025633     | 0.00465702 |
| 10601705 | Cenpi            | NM_145924     | 0.00466271 |
| 10533323 | Adam1a           | NM_172126     | 0.00466348 |
| 10578989 | Psd3             | NM_177698     | 0.00466648 |
| 10551435 | Fcgbp            | NM_001122603  | 0.00466752 |
| 10425623 | Csdc2            | NM_145473     | 0.00466757 |
| 10548614 | Tas2r114         | NM_207019     | 0.00467034 |
| 10407370 | 4833420G17Rik    | NM_001113550  | 0.00467073 |
| 10555009 |                  | ---           | 0.00467344 |
| 10478698 | Eya2             | NM_010165     | 0.00467855 |
| 10420413 | Lats2            | NM_015771     | 0.00467886 |
| 10399575 |                  | ---           | 0.00467926 |
| 10414784 | Gm26             | ENSMUST000001 | 0.0046919  |
| 10414894 | Gm26             | ENSMUST000001 | 0.0046919  |
| 10380289 | Mmd              | NM_026178     | 0.00469757 |
| 10476633 | Pcsk2            | NM_008792     | 0.0046976  |
| 10471770 | Olfrc357         | NM_146623     | 0.00469879 |
| 10340873 |                  | ---           | 0.00469935 |
| 10458534 | Pcdh1            | NM_029357     | 0.00470178 |
| 10534654 | Znhit1           | NM_027318     | 0.00470515 |
| 10415092 | 4930579G18Rik    | ENSMUST000000 | 0.00470628 |
| 10567645 | Ears2            | NM_026140     | 0.00470875 |
| 10431546 | Tymp             | NM_138302     | 0.00471335 |
| 10461553 | A430093F15Rik    | NR_027805     | 0.0047141  |
| 10378154 | Zzef1            | NM_001045536  | 0.00471731 |
| 10409915 | Cts6             | NM_021445     | 0.00471734 |
| 10410929 | Agk              | NM_023538     | 0.00471811 |
| 10583610 | Ilf3             | NM_010561     | 0.00471988 |
| 10466404 |                  | ---           | 0.00472072 |
| 10419850 | Cebpe            | NM_207131     | 0.00472765 |
| 10369086 | Gopc             | NM_053187     | 0.00472801 |
| 10373223 | Lrp1             | NM_008512     | 0.00472927 |
| 10554325 | 5730590G19Rik    | NM_029835     | 0.00473453 |
| 10509253 | 4930549C01Rik    | BC048442      | 0.00473728 |
| 10385507 | OTTMUSG000000055 | NM_001045540  | 0.00473839 |
| 10395739 | Srp54b           | NM_001100109  | 0.00473934 |
| 10425814 | Mpped1           | NM_172610     | 0.00474174 |
| 10394699 | Rock2            | NM_009072     | 0.0047427  |
| 10507286 | Ipp              | NM_008389     | 0.00475203 |
| 10414265 | BC061237         | BC061237      | 0.00475286 |
| 10548810 | E330021D16Rik    | BC099944      | 0.00475572 |
| 10344346 |                  | ---           | 0.00475685 |
| 10542857 | Far2             | NM_178797     | 0.00475855 |
| 10338923 |                  | ---           | 0.00476336 |
| 10555087 |                  | ---           | 0.00476411 |
| 10599812 | Zic3             | NM_009575     | 0.00476556 |
| 10502284 | Tet2             | NM_001040400  | 0.00477349 |
| 10479402 | I600027N09Rik    | NM_028479     | 0.00477813 |
| 10495549 | Dbt              | NM_010022     | 0.00477911 |
| 10348070 | Nel              | NM_010880     | 0.00477988 |
| 10368508 | 2610036L11Rik    | NM_001109747  | 0.00479183 |
| 10597969 | Gm10052          | NR_002885     | 0.00479193 |
| 10405191 | Secisbp2         | NM_029279     | 0.00479289 |
| 10569994 | Hmqb1            | NM_010439     | 0.00479604 |
| 10340717 |                  | ---           | 0.00479605 |
| 10445214 | Mut              | NM_008650     | 0.00479738 |
| 10451198 | Vegfa            | NM_001025250  | 0.00480535 |
| 10525179 | Oas1d            | NM_133893     | 0.00480975 |
| 10566644 | Ovch2            | NM_172908     | 0.00481534 |
| 10403220 | Abcb5            | NM_029961     | 0.00481545 |
| 10342263 |                  | ---           | 0.00482063 |
| 10523376 | Fras1            | NM_175473     | 0.00482144 |
| 10344717 |                  | ---           | 0.00482448 |
| 10391755 | Ccdc43           | NM_025918     | 0.00482459 |
| 10497169 | Gm6140           | XR_030720     | 0.00482627 |
| 10340118 |                  | ---           | 0.00482633 |
| 10380944 | Zbbp2            | NM_027061     | 0.00483067 |
| 10385747 | Phf15            | NM_199299     | 0.00483137 |
| 10522908 | 4931407G18Rik    | NM_027631     | 0.00483491 |
| 10508800 | LOC433762        | AY140896      | 0.00483719 |
| 10530652 | Scaf2            | NM_001114660  | 0.00484219 |
| 10520869 | Pib1             | NM_001081407  | 0.00485082 |
| 10540118 | Lsm3             | NM_026309     | 0.00485237 |
| 10585390 | Sln              | NM_025540     | 0.00485374 |
| 10562670 | Zfp715           | NM_027264     | 0.00485778 |
| 10360412 | Olfrc419         | NM_146715     | 0.00485814 |
| 10424126 | Depdc6           | NM_001037937  | 0.00486274 |
| 10413185 | Zmiz1            | NM_183208     | 0.00486412 |
| 10591608 | Dock6            | NM_177030     | 0.00487055 |
| 10528457 | Orc5l            | NM_011959     | 0.00487396 |
| 10435693 | Cox17            | NM_001017429  | 0.00487732 |
| 10443089 | Syngap1          | XM_985548     | 0.00487926 |
| 10338018 |                  | ---           | 0.00488153 |
| 10536118 |                  | ---           | 0.0048839  |
| 10432278 | Ddn              | NM_001013741  | 0.00488469 |
| 10496715 | Znhit6           | NM_001081094  | 0.00488584 |
| 10376196 | Hint1            | NM_008248     | 0.004886   |
| 10517090 | Arid1a           | NM_001080819  | 0.00489507 |

|          |               |               |            |
|----------|---------------|---------------|------------|
| 10554800 | Rab38         | NM_028238     | 0.00489529 |
| 10595211 | Col12a1       | NM_007730     | 0.00489532 |
| 10519490 | 4921511H03Rik | BC049718      | 0.00489589 |
| 10584067 | Zbtb44        | NM_001115130  | 0.00489608 |
| 10525365 | Hvcm1         | NM_001042489  | 0.00489925 |
| 10482712 | Slamf2        | NM_019667     | 0.00490099 |
| 10344950 | LOC675046     | XM_001473720  | 0.00490297 |
| 10381383 |               | ---           | 0.00490305 |
| 10351525 | Mpz           | NM_008623     | 0.00490945 |
| 10398795 | Aspg          | NM_001081169  | 0.00491185 |
| 10356267 | A530032D15Rik | BC094285      | 0.00491225 |
| 10440206 | Arl6          | NM_019665     | 0.00491864 |
| 10584288 | Robo4         | NM_028783     | 0.00492115 |
| 10579703 | Cherp         | NM_138585     | 0.00492194 |
| 10529567 | D5Erttd579e   | NM_001081232  | 0.00493154 |
| 10568115 | Mtz           | NM_080638     | 0.00493154 |
| 10558773 | B4galnt4      | NM_177897     | 0.0049321  |
| 10607116 | Ammecr1       | NM_019496     | 0.00493212 |
| 10577312 |               | ---           | 0.00493388 |
| 10339559 |               | ---           | 0.00493473 |
| 10543067 | Asns          | NM_012055     | 0.0049354  |
| 10390954 | Gm11556       | XM_894864     | 0.00493603 |
| 10339640 |               | ---           | 0.00493734 |
| 10543772 | Klf14         | NM_001135093  | 0.00493917 |
| 10395293 | Atxn711       | NM_001033436  | 0.00494882 |
| 10592248 | Gm6779        | XR_032917     | 0.00495769 |
| 10573152 | Ucp1          | NM_009463     | 0.00495831 |
| 10597309 | Stac          | NM_016853     | 0.00495857 |
| 10572975 | Ttc29         | NM_183096     | 0.0049593  |
| 10514924 | Tomm22        | NM_172609     | 0.00496278 |
| 10591110 | Fat3          | NM_001080814  | 0.00496373 |
| 10383192 |               | ---           | 0.00496383 |
| 10354845 | Orc2l         | NM_008765     | 0.0049661  |
| 10445232 | 3110082D06Rik | BC145294      | 0.00496873 |
| 10416090 | Stmn4         | NM_019675     | 0.00497065 |
| 10493995 | S100a10       | NM_009112     | 0.00497603 |
| 10430647 |               | ---           | 0.00498642 |
| 10586880 | Suhw4         | NM_146224     | 0.00498657 |
| 10569057 | Rnh1          | NM_145135     | 0.00498832 |
| 10496919 | Usp33         | NM_133247     | 0.00499046 |
| 10555873 | Olf652        | NM_147048     | 0.00499341 |
| 10372583 | Rab3ip        | NM_001003950  | 0.00499427 |
| 10341304 |               | ---           | 0.00499796 |
| 10501591 | A930005H10Rik | NR_015487     | 0.00499925 |
| 10593508 | Ddx10         | NM_029936     | 0.00500755 |
| 10505848 | Ifnz          | NM_197889     | 0.00500756 |
| 10505852 | Ifnz          | NM_197889     | 0.00500756 |
| 10580061 | Il27ra        | NM_016671     | 0.00500792 |
| 10342365 |               | ---           | 0.00500884 |
| 10340668 |               | ---           | 0.00501141 |
| 10604763 | Arpc1b        | NM_023142     | 0.00501203 |
| 10479112 | Gnas          | NM_022000     | 0.00501462 |
| 10478938 | Hax1          | NM_011826     | 0.00501622 |
| 10385870 | Irf1          | NM_008390     | 0.00501705 |
| 10400089 | Gm889         | BC147387      | 0.00501724 |
| 10553993 | Snrpa1        | NM_021336     | 0.00501744 |
| 10445879 | Kcnn8         | NM_001031811  | 0.00501909 |
| 10504450 | Glipr2        | NM_027450     | 0.00501981 |
| 10453544 | Mett14        | NM_176917     | 0.00502151 |
| 10354803 |               | ---           | 0.00502263 |
| 10338008 |               | ---           | 0.00502657 |
| 10553646 | Herc2         | NM_010418     | 0.00502848 |
| 10526098 | Scand3        | NM_183088     | 0.00503122 |
| 10372177 | Tmtc2         | NM_177368     | 0.00503242 |
| 10367734 | Ust           | NM_177387     | 0.00503425 |
| 10403312 | Akr1c19       | NM_001013785  | 0.00503483 |
| 10473517 |               | ---           | 0.00503572 |
| 10511755 | Wwp1          | NM_177327     | 0.00503841 |
| 10586284 | Dpp8          | NM_028906     | 0.00504955 |
| 10364051 | Snrpd3        | NM_026095     | 0.00504958 |
| 10340148 |               | ---           | 0.00505592 |
| 10344296 |               | ---           | 0.00505631 |
| 10339950 |               | ---           | 0.00505898 |
| 10598041 |               | ---           | 0.00506068 |
| 10356345 | Nppc          | NM_010933     | 0.00506335 |
| 10439651 | Cd200         | NM_010818     | 0.00506369 |
| 10507190 | 4732418C07Rik | BC059213      | 0.00506644 |
| 10343718 |               | ---           | 0.00506662 |
| 10460738 | Cdca5         | NM_026410     | 0.00506668 |
| 10378059 | Txnrc17       | NM_026559     | 0.00507331 |
| 10554005 | H47           | NM_024439     | 0.00507438 |
| 10488797 | Pxmp4         | NM_021534     | 0.00507497 |
| 10338011 |               | ---           | 0.00507645 |
| 10340879 |               | ---           | 0.00508112 |
| 10584370 | Olf885        | NM_001011739  | 0.00508582 |
| 10496822 | Gng5          | NM_010318     | 0.005091   |
| 10345065 | Gsta3         | NM_001077353  | 0.00509207 |
| 10433340 | 4930451G09Rik | ENSMUST000000 | 0.00509466 |
| 10436828 | Olig1         | NM_016968     | 0.00509731 |
| 10356968 | Pam           | NM_010226     | 0.00509936 |
| 10495657 | Alq14         | ENSMUST000000 | 0.00510353 |
| 10361139 | Traf5         | NM_011633     | 0.00510494 |
| 10338597 |               | ---           | 0.00511215 |
| 10342770 |               | ---           | 0.00511229 |
| 10343540 |               | ---           | 0.00512324 |
| 10338061 |               | ---           | 0.00512622 |
| 10541301 | Tuba8         | NM_017379     | 0.00512704 |
| 10446833 | Birc6         | NM_007566     | 0.00512804 |
| 10401473 | Aldh6a1       | NM_134042     | 0.00512916 |
| 10349138 | Serp1nb11     | NM_028587     | 0.00512936 |
| 10504905 | E130309F12Rik | NM_178756     | 0.0051372  |
| 10415363 | Gmpr2         | NM_177992     | 0.00513834 |
| 10567316 | Tmc7          | NM_172476     | 0.00514114 |
| 10407392 | BC016423      | NM_134063     | 0.00514125 |
| 10511935 | Pnrc1         | NM_001033225  | 0.00515009 |
| 10344462 |               | ---           | 0.00515312 |
| 10562181 | Lsr           | NM_017405     | 0.00515488 |
| 10484646 |               | ---           | 0.00515588 |
| 10385114 | Foxi1         | NM_023907     | 0.00515935 |
| 10572533 | Myo9b         | NM_001142322  | 0.00516039 |
| 10462361 | Hmgbl1        | NM_010439     | 0.00516148 |
| 10382152 | Helz          | NM_198298     | 0.00516496 |
| 10499888 | 2310007A19Rik | NM_025506     | 0.00516898 |
| 10596652 | Hemk1         | NM_133984     | 0.00516924 |
| 10373530 | Cdk2          | NM_183417     | 0.00517203 |
| 10540544 | Thumpd3       | NM_008188     | 0.00517358 |
| 10437210 | Bace2         | NM_019517     | 0.00517622 |
| 10441588 | Tcp10b        | NM_011553     | 0.00517631 |
| 10448441 | Amdhd2        | NM_172935     | 0.00518414 |
| 10552118 | LOC100044517  | XM_001472266  | 0.00519347 |
| 10365578 | Nup37         | NM_028334     | 0.00519399 |
| 10513592 | Wdr31         | NM_023597     | 0.00519639 |
| 10455738 | Snx2          | NM_026386     | 0.00519855 |
| 10532330 | Ankle2        | NM_027922     | 0.0052001  |
| 10352234 | Itpkb         | NM_001081175  | 0.00521421 |
| 10381738 | Wnt3          | NM_009521     | 0.00521513 |
| 10526675 | Tsc22d4       | NM_023910     | 0.00521555 |
| 10424213 | Zhx2          | NM_199449     | 0.00521693 |

|          |               |               |            |
|----------|---------------|---------------|------------|
| 10429400 |               | ---           | 0.00522001 |
| 10560111 | Gm5584        | NM 001101534  | 0.00522041 |
| 10352166 | 9630058J23Rik | BC054802      | 0.00522226 |
| 10395005 | Kidins220     | NM 001081378  | 0.00522529 |
| 10570344 | Lamp1         | NM 010684     | 0.00522622 |
| 10516466 | Zmym1         | NM 026670     | 0.00523026 |
| 10540012 | Zxc           | NM 173002     | 0.00523177 |
| 10396108 | Arf6          | NM 007481     | 0.00523542 |
| 10546086 |               | ---           | 0.00523698 |
| 10586458 | Csnk1g1       | NM 173185     | 0.00523775 |
| 10344425 |               | ---           | 0.00524055 |
| 10428809 | Kih138        | NM 177755     | 0.00524257 |
| 10341253 |               | ---           | 0.00524384 |
| 10534570 | Orai2         | NM 178751     | 0.00524424 |
| 10350684 | Arpc5         | NM 026369     | 0.00524863 |
| 10403821 | Tcrq-V3       | ENSMUST000000 | 0.00525255 |
| 10467599 | Slt1          | NM 015748     | 0.00525737 |
| 10424965 | Ppp1r16a      | NM 033371     | 0.00525811 |
| 10598586 | Xk            | NM 023500     | 0.00526565 |
| 10580484 | Heatr3        | NM 172757     | 0.00526862 |
| 10421810 | 1190002H23Rik | NM 025427     | 0.00527314 |
| 10413171 |               | ---           | 0.00527946 |
| 10501649 | Rtd1          | NM 025517     | 0.00527966 |
| 10495332 | 1700013F07Rik | BC116223      | 0.00528506 |
| 10505858 | Ifnz          | NM 197889     | 0.00529061 |
| 10516103 | Macf1         | NM 009600     | 0.00529266 |
| 10399421 | Mycn          | NM 008709     | 0.00529309 |
| 10343153 |               | ---           | 0.00529506 |
| 10557009 | Eef2k         | NM 007908     | 0.00529732 |
| 10567108 | Sox6          | NM 011445     | 0.00529767 |
| 10412921 | Nid2          | NM 008695     | 0.00530402 |
| 10371583 | Gm10055       | ENSMUST000000 | 0.00530564 |
| 10443830 | Cryaa         | NM 013501     | 0.00531112 |
| 10605067 | Pnck          | NM 012040     | 0.00531829 |
| 10402808 | Jag2          | NM 010588     | 0.00532078 |
| 10601456 | Gm6377        | NM 001037917  | 0.00532295 |
| 10523897 | Mttr10        | NM 172742     | 0.00532378 |
| 10362924 |               | ---           | 0.00532385 |
| 10479649 | Prpf6         | NM 133701     | 0.00532404 |
| 10515744 | Cdc20         | NM 023223     | 0.00532955 |
| 10606263 | Atrx          | NM 009530     | 0.00533598 |
| 10365658 | Uhrf1bp1l     | NM 029166     | 0.00533647 |
| 10442779 | Prss29        | NM 053260     | 0.00533784 |
| 10340722 |               | ---           | 0.00533994 |
| 10521481 | Jakmp1        | NM 178394     | 0.00534238 |
| 10464363 | 4930442E04Rik | ENSMUST000000 | 0.00534298 |
| 10505705 | Sh3gl2        | NM 019535     | 0.00534319 |
| 10549962 | Gm5130        | XR 033395     | 0.00535198 |
| 10552412 | Cldnd2        | NM 028849     | 0.00535362 |
| 10602081 | Vsig1         | NM 030181     | 0.00536068 |
| 10343844 |               | ---           | 0.00536073 |
| 10405804 | 0610007P08Rik | NM 001013608  | 0.00536325 |
| 10497421 | Hps3          | NM 080634     | 0.00536387 |
| 10495830 | Sec24d        | NM 027135     | 0.00536483 |
| 10508974 | Pafah2        | NM 133880     | 0.00536686 |
| 10386058 | Sparc         | NM 009242     | 0.00536916 |
| 10347117 | Cps1          | NM 001080809  | 0.00537687 |
| 10566225 | Olfm16        | NM 147099     | 0.00537759 |
| 10411274 | Sv2c          | NM 029210     | 0.00537866 |
| 10531952 | Abcg3         | NM 030239     | 0.00538133 |
| 10459534 | Afg3l2        | NM 027130     | 0.00538546 |
| 10488860 |               | ---           | 0.00538717 |
| 10468527 | 5830416P10Rik | ENSMUST000000 | 0.00539753 |
| 10490246 | 3100002L24Rik | ENSMUST000000 | 0.00539866 |
| 10436958 | Clic6         | NM 172469     | 0.00540072 |
| 10487577 | Ckap2l        | NM 181589     | 0.00540643 |
| 10341016 |               | ---           | 0.00540889 |
| 10541075 | Cxcl12        | NM 001012477  | 0.00541143 |
| 10398422 |               | ---           | 0.00541311 |
| 10426891 | Metti7a1      | NM 027334     | 0.00541567 |
| 10398426 |               | ---           | 0.00541929 |
| 10515164 | Cmpk1         | NM 025647     | 0.00542131 |
| 10460693 | Frmd8         | NM 026169     | 0.00542276 |
| 10523880 | Rpap2         | NM 144911     | 0.00542336 |
| 10474093 | 2810002D19Rik | NR 027831     | 0.00542908 |
| 10389775 | Pctp          | NM 008796     | 0.00542961 |
| 10387170 | Ntn1          | NM 008744     | 0.00543456 |
| 10338670 |               | ---           | 0.00543862 |
| 10570178 | A230072106Rik | ENSMUST000000 | 0.00543907 |
| 10605104 | Pdzd4         | NM 001029868  | 0.00543996 |
| 10561679 | Psmd8         | NM 026545     | 0.00544144 |
| 10404566 | 4933417A18Rik | NM 025750     | 0.00544611 |
| 10465553 | Fkbp2         | NM 008020     | 0.00544791 |
| 10543319 | Fam3c         | NM 138587     | 0.00544803 |
| 10449935 | Zfp870        | NM 207245     | 0.00544859 |
| 10492757 | Pirg1         | NM 016784     | 0.00545197 |
| 10392347 | Pitpnc1       | NM 145823     | 0.00546091 |
| 10338588 |               | ---           | 0.00546158 |
| 10601086 |               | ---           | 0.00546448 |
| 10554162 |               | ---           | 0.00546499 |
| 10608716 |               | ---           | 0.00546504 |
| 10436519 | Robo1         | NM 019413     | 0.00546536 |
| 10410364 | 6720487G11Rik | ENSMUST000000 | 0.00547104 |
| 10359518 | Eif4e1b       | NM 001033269  | 0.00547176 |
| 10467578 | Pik3ap1       | NM 031376     | 0.00547559 |
| 10458906 | Ppic          | NM 008908     | 0.00548758 |
| 10559784 | Olf1347       | NM 146385     | 0.00548838 |
| 10546454 | Adamts9       | NM 175314     | 0.00549198 |
| 10552097 | Gm6669        | XM 890946     | 0.00549552 |
| 10451884 | Rpl21         | U93863        | 0.00549599 |
| 10411227 | Smx18         | NM 130796     | 0.00549612 |
| 10506433 | Dab1          | NM 177259     | 0.00550074 |
| 10355454 | Gm5256        | XR 032730     | 0.00550121 |
| 10548829 | Gucy2c        | NM 001127318  | 0.00550355 |
| 10496539 | Gbp5          | NM 153564     | 0.00550877 |
| 10442396 | Abca3         | NM 013855     | 0.00551477 |
| 10344679 | St18          | NM 173868     | 0.00551549 |
| 10370422 | Pwp2          | NM 029546     | 0.00551844 |
| 10564375 |               | ---           | 0.00551943 |
| 10453082 | Hnrp1l        | NM 144802     | 0.00552215 |
| 10440467 | Rpl21         | BC084410      | 0.00553092 |
| 10438899 | Cpn2          | NM 027904     | 0.00553494 |
| 10414175 | Gm10713       | XM 001474680  | 0.00554222 |
| 10439788 |               | ---           | 0.00554321 |
| 10342267 |               | ---           | 0.00554365 |
| 10350838 | 2810417H13Rik | NM 026515     | 0.00554399 |
| 10515481 | Dmap1         | NM 023178     | 0.00554421 |
