# Supplementary material for: miR-182 and miR-10a Are Key Regulators of Treg Specialisation and Stability during Schistosome and Leishmania-associated Inflammation
Source: PubMed Central journal article supplement (PMC3695057; doi:10.1371/journal.ppat.1003451), 2013-06-27
Supplement: ppat.1003451.s011.pdf [file ppat.1003451.s011.pdf]

| <b><i>S. mansoni</i>-derived Foxp3<sup>+</sup></b> |                  |                    |                          |                |
|----------------------------------------------------|------------------|--------------------|--------------------------|----------------|
| <b>ID given by TargetScanS</b>                     | <b>miRNA</b>     | <b>Fold-change</b> | <b>-log(fold-change)</b> | <b>p-value</b> |
| <i>miR-210</i>                                     | ID=mmu-mir-210   | 13.75              | 3.78                     | 0.0145         |
| <i>miR-183</i>                                     | ID=mmu-mir-183   | 6.62               | 2.73                     | 0.0004         |
| <i>miR-182</i>                                     | ID=mmu-mir-182   | 4.09               | 2.03                     | 0.0013         |
| <i>miR-125/351</i>                                 | ID=mmu-mir-351   | 3.71               | 1.89                     | 0.0003         |
| <i>miR-188</i>                                     | ID=mmu-mir-188   | 3.52               | 1.82                     | 0.0422         |
| <i>miR-532</i>                                     | ID=mmu-mir-532   | 2.83               | 1.50                     | 0.0014         |
| <i>miR-501</i>                                     | ID=mmu-mir-501   | 2.67               | 1.42                     | 0.0122         |
| <i>miR-22</i>                                      | ID=mmu-mir-22    | 2.41               | 1.27                     | 0.0351         |
| <i>miR-330</i>                                     | ID=mmu-mir-330   | 2.12               | 1.08                     | 0.0111         |
| <i>miR-132/212</i>                                 | ID=mmu-mir-132   | 2.09               | 1.07                     | 0.0005         |
| <i>miR-21</i>                                      | ID=mmu-mir-21    | 2.05               | 1.04                     | 0.0338         |
| <i>miR-149</i>                                     | ID=mmu-mir-149   | 1.78               | 0.83                     | 0.0348         |
| <i>miR-744</i>                                     | ID=mmu-mir-744   | 1.62               | 0.70                     | 0.0147         |
| <i>miR-324-5p</i>                                  | ID=mmu-mir-324   | 1.48               | 0.57                     | 0.0349         |
| <i>miR-10</i>                                      | ID=mmu-mir-10a   | 0.62               | -0.68                    | 0.0307         |
| <i>miR-192/215</i>                                 | ID=mmu-mir-192   | 0.59               | -0.75                    | 0.016          |
| <i>miR-128</i>                                     | ID=mmu-mir-128-1 | 0.54               | -0.90                    | 0.0212         |
| <i>miR-350</i>                                     | ID=mmu-mir-350   | 0.48               | -1.06                    | 0.0468         |
| <i>miR-339</i>                                     | ID=mmu-mir-339   | 0.45               | -1.16                    | 0.0161         |
| <i>miR-30-5p</i>                                   | ID=mmu-mir-30e   | 0.42               | -1.26                    | 0.0334         |
| <i>miR-203.1</i>                                   | ID=mmu-mir-203   | 0.38               | -1.41                    | 0.0425         |
| <i>miR-455</i>                                     | ID=mmu-mir-455   | 0.36               | -1.46                    | 0.0416         |
| <i>miR-19</i>                                      | ID=mmu-mir-19b-1 | 0.36               | -1.48                    | 0.0015         |
| <i>miR-467</i>                                     | ID=mmu-mir-467e  | 0.33               | -1.62                    | 0.0394         |
| <i>miR-15/16/195/424/497</i>                       | ID=mmu-mir-15b   | 0.28               | -1.83                    | 0.0425         |
| <i>miR-204/211</i>                                 | ID=mmu-mir-211   | 0.24               | -2.05                    | 0.001          |
| <i>miR-25/32/92/363/367</i>                        | ID=mmu-mir-32    | 0.22               | -2.20                    | 0.0465         |
| <i>miR-151</i>                                     | ID=mmu-mir-151   | 0.19               | -2.37                    | 0.0077         |
| <i>miR-466</i>                                     | ID=mmu-mir-466d  | 0.17               | -2.59                    | 0.0012         |
| <i>miR-99a</i>                                     | ID=mmu-mir-99a   | 0.16               | -2.62                    | 0.0337         |
| <i>miR-342</i>                                     | ID=mmu-mir-342   | 0.16               | -2.63                    | 0.001          |

| <b><i>L. major</i>-derived Foxp3<sup>+</sup></b> |                 |                    |                          |                |
|--------------------------------------------------|-----------------|--------------------|--------------------------|----------------|
| <b>ID given by TargetScanS</b>                   | <b>miRNA</b>    | <b>Fold-change</b> | <b>-log(fold-change)</b> | <b>p-value</b> |
| <i>miR-99/100</i>                                | ID=mmu-mir-100  | 3.52               | 1.81                     | 0.006          |
| <i>miR-674</i>                                   | ID=mmu-mir-674  | 0.56               | -0.85                    | 0.022          |
| <i>miR-151</i>                                   | ID=mmu-mir-151  | 0.41               | -1.27                    | 0.015          |
| <i>miR-17-5p/20/93.mr/106/519.d</i>              | ID=mmu-mir-93   | 0.37               | -1.42                    | 0.004          |
| <i>miR-423</i>                                   | ID=mmu-mir-423  | 0.36               | -1.48                    | 0.029          |
| <i>miR-140</i>                                   | ID=mmu-mir-140  | 0.34               | -1.57                    | 0.034          |
| <i>miR-30-5p</i>                                 | ID=mmu-mir-30e  | 0.32               | -1.64                    | 0.026          |
| <i>let-7/98</i>                                  | ID=mmu-let-7g   | 0.25               | -2.02                    | 0.038          |
| <i>miR-15/16/195/424/497</i>                     | ID=mmu-mir-15b  | 0.19               | -2.43                    | 0.025          |
| <i>miR-155</i>                                   | ID=mmu-mir-155  | 0.18               | -2.46                    | 0.035          |
| <i>miR-132/212</i>                               | ID=mmu-mir-132  | 0.17               | -2.56                    | 0.006          |
| <i>miR-805</i>                                   | ID=mmu-mir-805  | 0.16               | -2.65                    | 0.014          |
| <i>miR-466</i>                                   | ID=mmu-mir-466g | 0.13               | -2.92                    | 0.007          |
| <i>miR-342</i>                                   | ID=mmu-mir-342  | 0.11               | -3.18                    | 0.004          |
| <i>miR-467</i>                                   | ID=mmu-mir-467c | 0.11               | -3.20                    | 0.027          |
| <i>miR-10</i>                                    | ID=mmu-mir-10a  | 0.08               | -3.65                    | 0.009          |
| <i>miR-25/32/92/363/367</i>                      | ID=mmu-mir-32   | 0.07               | -3.75                    | 0.029          |
