# Supplementary material for: miR-182 and miR-10a Are Key Regulators of Treg Specialisation and Stability during Schistosome and Leishmania-associated Inflammation
Source: PubMed Central journal article supplement (PMC3695057; doi:10.1371/journal.ppat.1003451), 2013-06-27
Supplement: ppat.1003451.s012.pdf [file ppat.1003451.s012.pdf]

**Supplementary Table 4**

| <b>L. major-derived Foxp3+</b> |               |                        |         |
|--------------------------------|---------------|------------------------|---------|
| miRNA down-regulated           | -LOG(p-value) | Significance threshold | p-value |
| miR-10                         | 2.431798276   | 1.30103                | 0.0037  |
| miR-30-5p                      | 2.086186148   | 1.30103                | 0.0082  |
| let-7/98                       | 1.643974143   | 1.30103                | 0.0227  |
| miR-674                        | 1.218244625   | 1.30103                | 0.0605  |
| miR-466                        | 0.513569521   | 1.30103                | 0.3065  |
| miR-342                        | 0.327902142   | 1.30103                | 0.47    |
| miR-25/32/92/363/367           | 0.218891164   | 1.30103                | 0.6041  |
| miR-155                        | 0.171533453   | 1.30103                | 0.6737  |
| miR-15/16/195/424/497          | 0.163422725   | 1.30103                | 0.6864  |
| miR-132/212                    | 0.149231273   | 1.30103                | 0.7092  |
| miR-17-5p/20/93.mr/106/519.d   | 0.126795691   | 1.30103                | 0.7468  |
| miR-423                        | 0             | 1.30103                | 1       |
| miR-805                        | 0             | 1.30103                | 1       |
| miR-467                        | 0             | 1.30103                | 1       |
| miR-151                        | 0             | 1.30103                | 1       |
| miR-140                        | 0             | 1.30103                | 1       |

| <b>S. mansoni-derived Foxp3+</b> |               |                        |         |                       |               |                        |         |
|----------------------------------|---------------|------------------------|---------|-----------------------|---------------|------------------------|---------|
| miRNA up-regulated               | -LOG(p-value) | Significance threshold | p-value | miRNA down-regulated  | -LOG(p-value) | Significance threshold | p-value |
| miR-182                          | 1.43651891    | 1.30103                | 0.0366  | miR-192/215           | 0.57642648    | 1.30103                | 0.2652  |
| miR-21                           | 1.2823295     | 1.30103                | 0.0522  | miR-350               | 0.54836705    | 1.30103                | 0.2829  |
| miR-132/212                      | 1.01772877    | 1.30103                | 0.096   | miR-204/211           | 0.50640255    | 1.30103                | 0.3116  |
| miR-324-5p                       | 0.77754366    | 1.30103                | 0.1669  | miR-15/16/195/424/497 | 0.33582829    | 1.30103                | 0.4615  |
| miR-183                          | 0.77676373    | 1.30103                | 0.1672  | miR-203.1             | 0.32294082    | 1.30103                | 0.4754  |
| miR-22                           | 0.46813805    | 1.30103                | 0.3403  | miR-30-5p             | 0.31939257    | 1.30103                | 0.4793  |
| miR-330                          | 0.32312357    | 1.30103                | 0.4752  | miR-342               | 0.28083451    | 1.30103                | 0.5238  |
| miR-125/351                      | 0             | 1.30103                | 1       | miR-10                | 0.21896306    | 1.30103                | 0.604   |
| miR-532                          | 0             | 1.30103                | 1       | miR-19                | 0.18104869    | 1.30103                | 0.6591  |
| miR-501                          | 0             | 1.30103                | 1       | miR-128               | 0.17153345    | 1.30103                | 0.6737  |
| miR-744                          | 0             | 1.30103                | 1       | miR-466               | 0.14599777    | 1.30103                | 0.7145  |
| miR-149                          | 0             | 1.30103                | 1       | miR-25/32/92/363/367  | 0.09366496    | 1.30103                | 0.806   |
| miR-188                          | 0             | 1.30103                | 1       | miR-467               | 0.06308432    | 1.30103                | 0.8648  |
|                                  |               |                        |         | miR-151               | 0             | 1.30103                | 1       |
|                                  |               |                        |         | miR-339               | 0             | 1.30103                | 1       |
|                                  |               |                        |         | miR-99a               | 0             | 1.30103                | 1       |
|                                  |               |                        |         | miR-455               | 0             | 1.30103                | 1       |
