# Supplementary material for: miR-182 and miR-10a Are Key Regulators of Treg Specialisation and Stability during Schistosome and Leishmania-associated Inflammation
Source: PubMed Central journal article supplement (PMC3695057; doi:10.1371/journal.ppat.1003451), 2013-06-27
Supplement: ppat.1003451.s013.pdf [file ppat.1003451.s013.pdf]

**Supplementary Table 5**

| <b>Gene<br/>(Positionally-conserved<br/>in at least one* or two<br/>other species)</b> | <b><i>L. major</i>-derived<br/>Foxp3<sup>+</sup></b> | <b><i>S. mansoni</i>-derived<br/>Foxp3<sup>+</sup></b> |
|----------------------------------------------------------------------------------------|------------------------------------------------------|--------------------------------------------------------|
| <b>Mmu-miR-10a</b>                                                                     | - 12.53                                              | - 0.68                                                 |
| <b>ARRDC3</b>                                                                          | 1.72                                                 | -                                                      |
| <b>BCL6</b>                                                                            | 1.79                                                 | -                                                      |
| <b>FBXO30</b>                                                                          | 1.68                                                 | -                                                      |
| <b>H3F3B</b>                                                                           | 1.6                                                  | -                                                      |
| <b>NR4A3</b>                                                                           | 2.27                                                 | 1.96                                                   |
| <b>RAP2A</b>                                                                           | 1.54                                                 | -                                                      |
| <b>SPTY2D1</b>                                                                         | 1.95                                                 | -                                                      |
| <b>TFAP2A (Tcfap2a)</b>                                                                | 1.53                                                 | -                                                      |
| <b>TFRC</b>                                                                            | 1.71                                                 | -                                                      |
| <b>*CLCN5</b>                                                                          | 1.84                                                 | 2.22                                                   |
| <b>*FOSL2</b>                                                                          | 2.77                                                 | -                                                      |
| <b> </b>                                                                               |                                                      |                                                        |
| <b>Mmu-miR-182</b>                                                                     | -                                                    | 4.09                                                   |
| <b>ARHGEF3</b>                                                                         | -                                                    | - 1.61                                                 |
| <b>BACH2</b>                                                                           | -                                                    | - 1.68                                                 |
| <b>BCL2</b>                                                                            | - 2.13                                               | - 1.61                                                 |
| <b>CD2AP</b>                                                                           | -                                                    | - 1.84                                                 |
| <b>CEBPA</b>                                                                           | -                                                    | - 1.61                                                 |
| <b>DSCAM</b>                                                                           | -                                                    | - 1.70                                                 |
| <b>HDAC9</b>                                                                           | -                                                    | - 2.00                                                 |
| <b>KIF1B</b>                                                                           | -                                                    | - 1.59                                                 |
| <b>NRN1</b>                                                                            | -                                                    | - 2.17                                                 |
| <b>PGAP1</b>                                                                           | -                                                    | - 1.71                                                 |
| <b>QSER1</b>                                                                           | -                                                    | - 1.94                                                 |
| <b>RAPGEF4</b>                                                                         | - 1.56                                               | - 1.68                                                 |
| <b>*CD96</b>                                                                           | - 2.31                                               | - 2.33                                                 |
| <b>*KLF3</b>                                                                           | - 2.15                                               | - 1.77                                                 |
| <b>*SGK3</b>                                                                           | -                                                    | - 2.07                                                 |
| <b>*ST6GAL1</b>                                                                        | -                                                    | - 1.80                                                 |
